# Supplementary material for: Systematic QSAR and iQCCR modelling of fused/non-fused aromatic hydrocarbons (FNFAHs) carcinogenicity to rodents: reducing unnecessary chemical synthesis and animal testing
Source: Royal Society of Chemistry journal article supplement (doi:10.1039/d2gc00986b), 2022-01-01
Supplement: d2gc00986b1.pdf [file d2gc00986b1.pdf]

## **Electronic Supplementary Information 1**

### **Systematic QSAR and iQCCR Modelling of Fused/Non-Fused Aromatic Hydrocarbons (FNFAHs) Carcinogenicity to Rodents: Reduce Unnecessary Chemical Synthesis and Animal Testing**

Feifan Li<sup>a</sup>, Tengjiao Fan<sup>a,b</sup>, Guohui Sun<sup>a,\*</sup>, Lijiao Zhao<sup>a</sup>, Rugang Zhong<sup>a</sup>, Yongzhen Peng<sup>c</sup>

<sup>a</sup>*Beijing Key Laboratory of Environmental and Viral Oncology, Faculty of Environment and Life, Beijing University of Technology, Beijing 100124, P. R. China*

<sup>b</sup>*Department of Medical Technology, Beijing Pharmaceutical University of Staff and Workers, Beijing 100079, China*

<sup>c</sup>*National Engineering Laboratory for Advanced Municipal Wastewater Treatment and Reuse Technology, Faculty of Environment and Life, Beijing University of Technology, Beijing 100124, China*

\*Corresponding author: Guohui Sun

Tel.: +86-10-67391917

E-mail address: [sunguohui@bjut.edu.cn](mailto:sunguohui@bjut.edu.cn) (G. S.)

Fig. S1

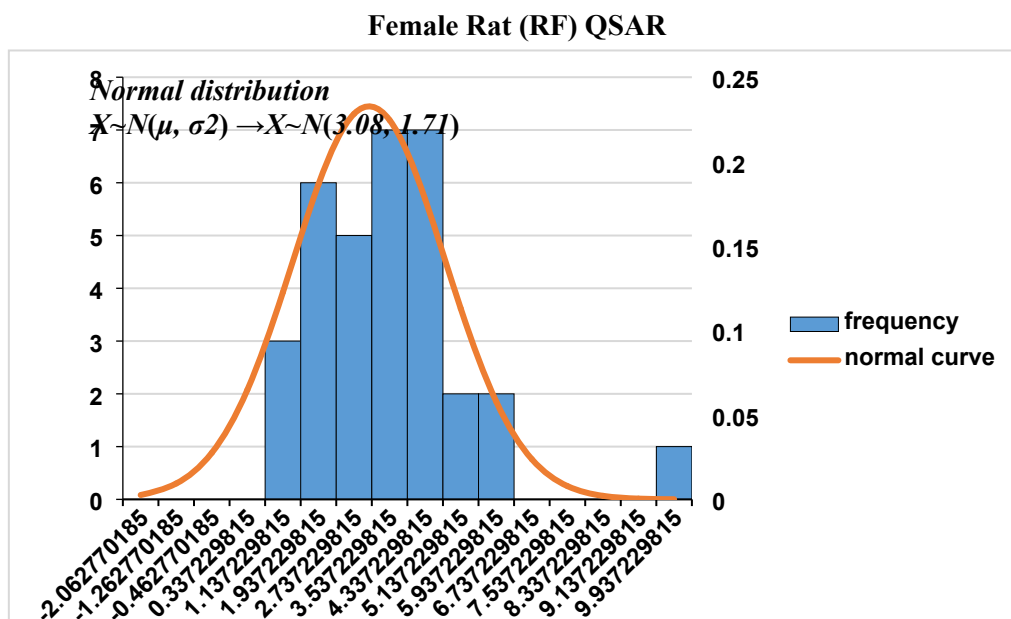

Fig. S1. Carcinogenicity data distribution of FNFAHs used in the female rat dataset.

Fig. S2

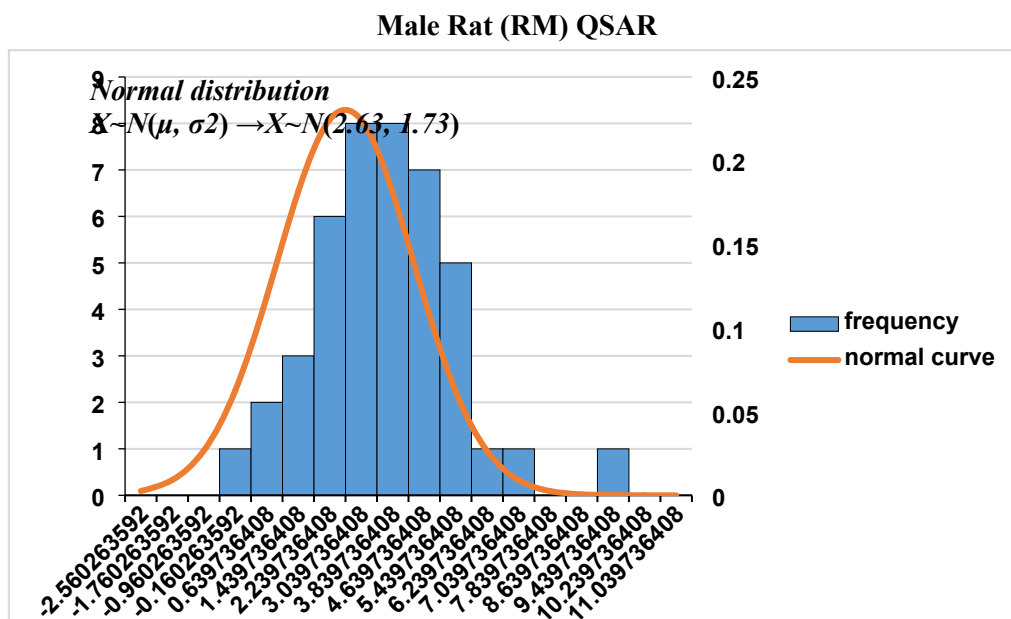

Fig. S2. Carcinogenicity data distribution of FNFAHs used in the male rat dataset.

Fig. S3

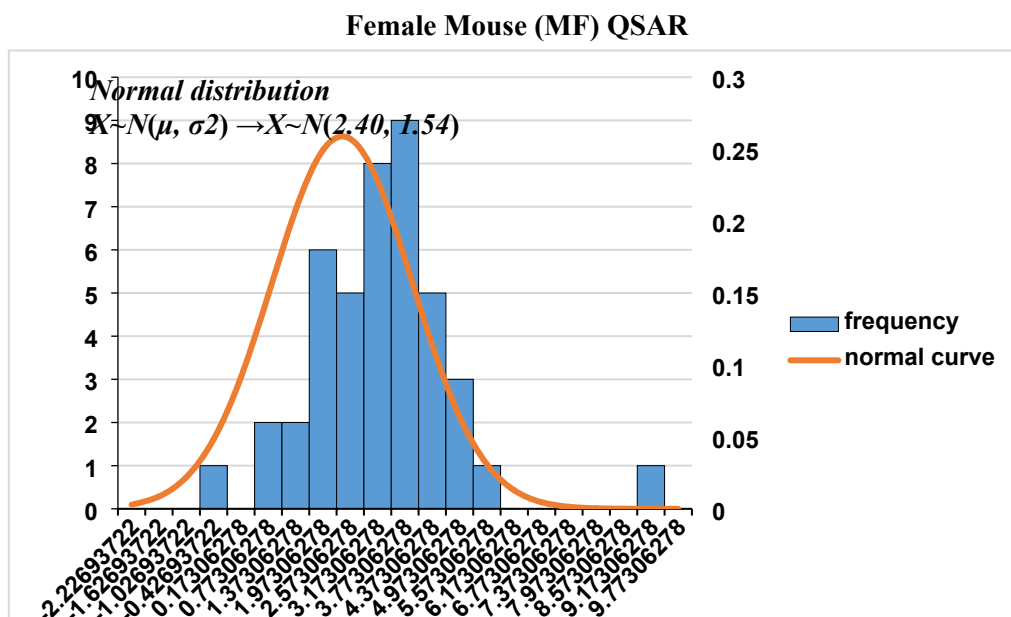

Fig. S3. Carcinogenicity data distribution of FNFAHs used in the female mouse dataset.

Fig. S4

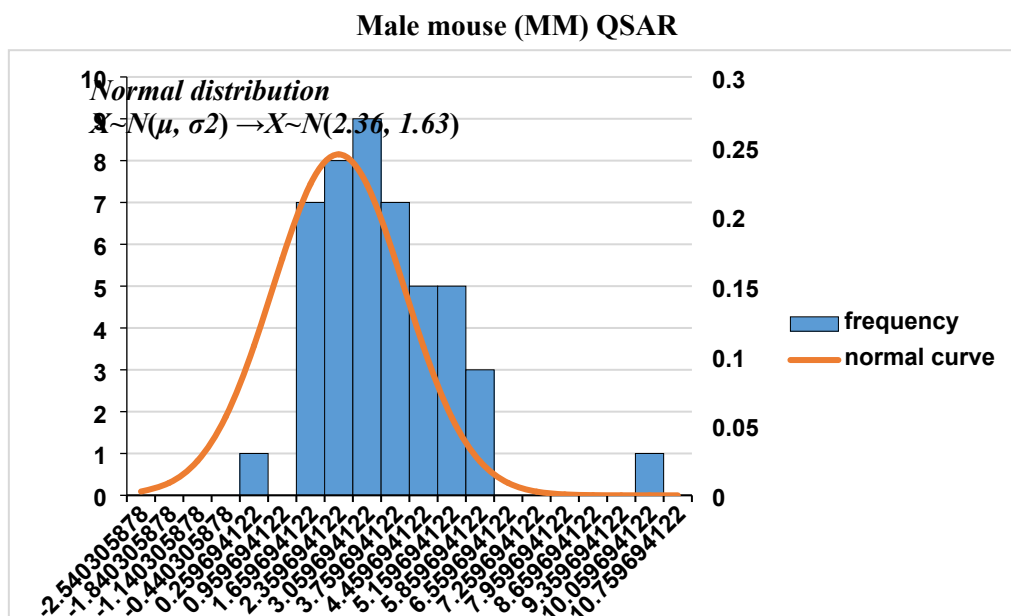

Fig. S4. Carcinogenicity data distribution of FNFAHs used in the male mouse dataset.

Fig. S5

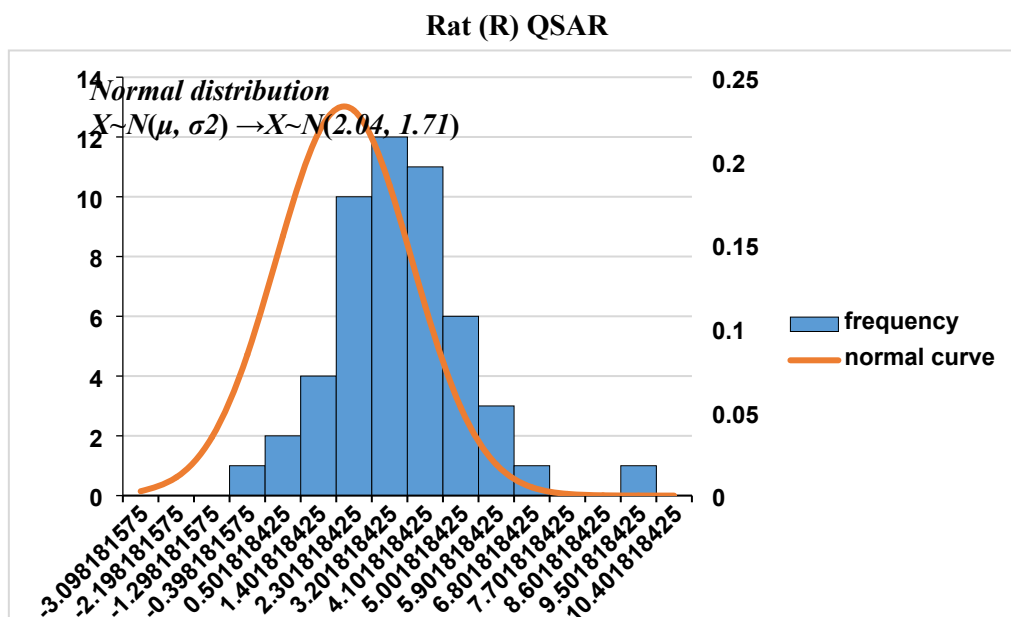

Fig. S5. Carcinogenicity data distribution of FNFAHs used in the rat dataset.

Fig. S6

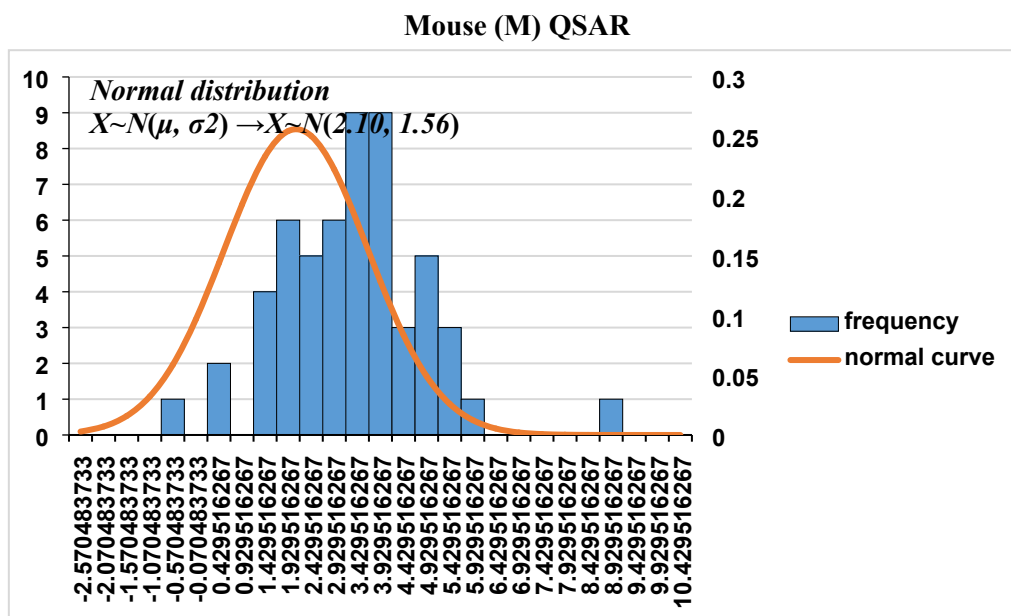

Fig. S6. Carcinogenicity data distribution of FNFAHs used in the mouse dataset.

Fig. S7

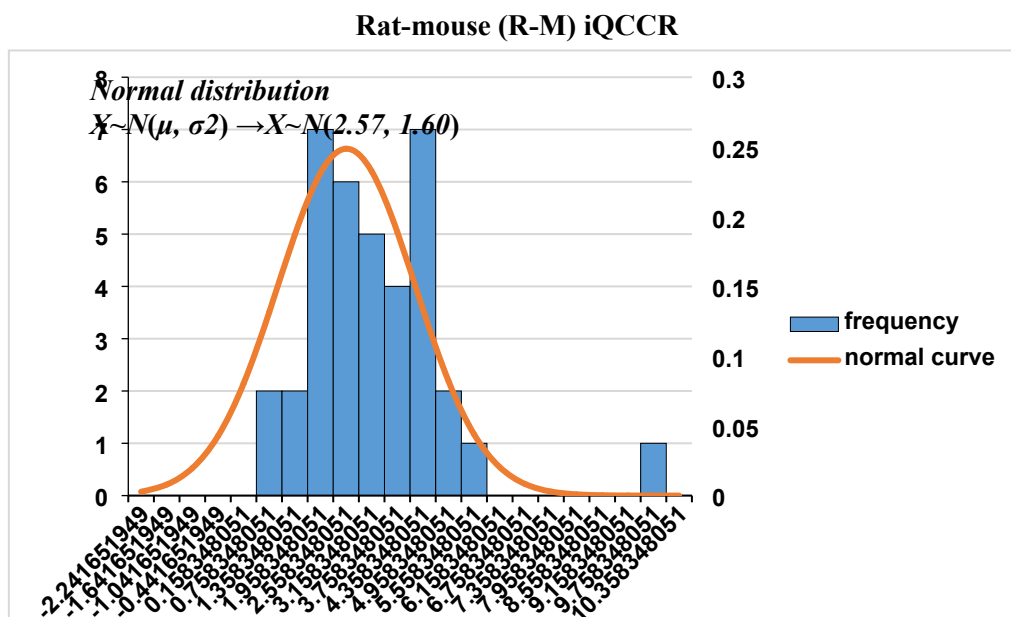

Fig. S7. Carcinogenicity data distribution of FNFAHs used in the rat-mouse iQCCR dataset.

Fig. S8

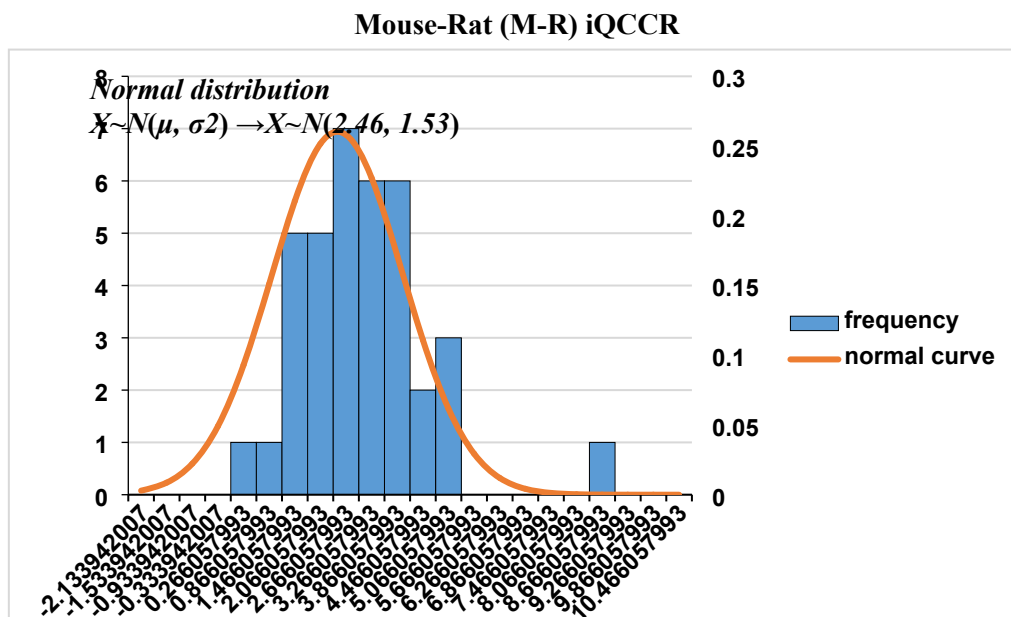

**Fig. S9**

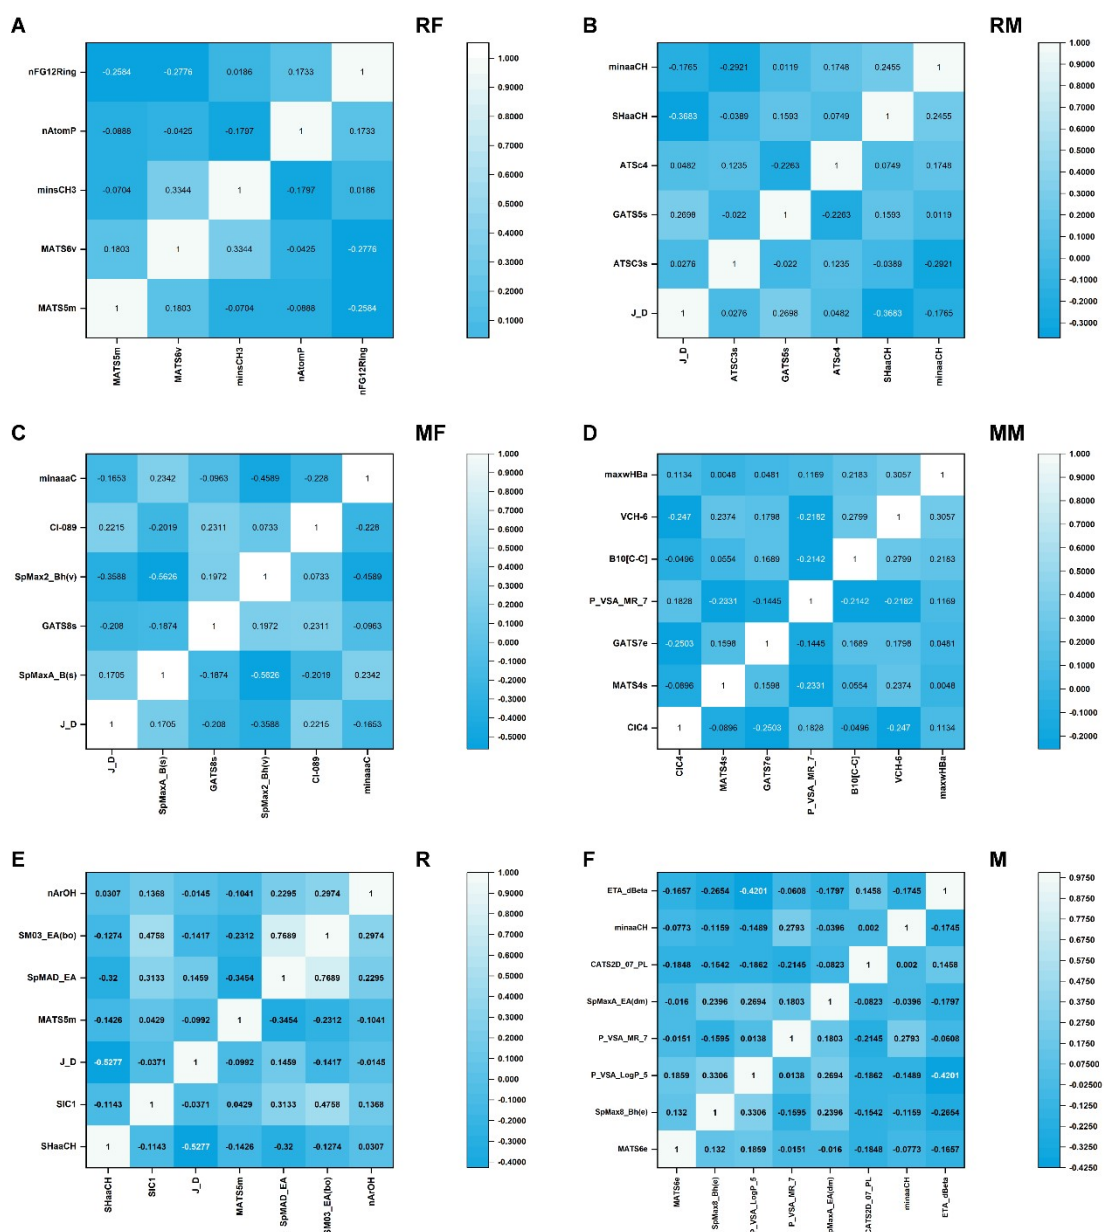

**Fig. S9.** Inter-correlation plots of molecular descriptors appearing in the best QSAR model. (A) Female rat model; (B) Male rat model; (C) Female mouse model; (D) Male mouse model; (E) Rat model; (F) Mouse model.

**Fig. S10**

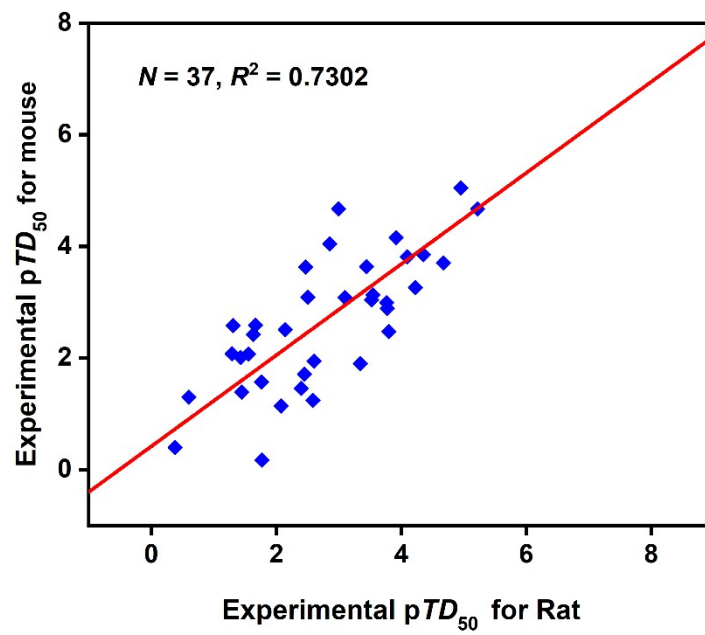

**Fig. S10.** Linear regression analysis plot based the experimental pTD<sub>50</sub> values for rat versus the experimental pTD<sub>50</sub> values for mouse.
