# Supplementary material for: Systematic QSAR and iQCCR modelling of fused/non-fused aromatic hydrocarbons (FNFAHs) carcinogenicity to rodents: reducing unnecessary chemical synthesis and animal testing
Source: Royal Society of Chemistry journal article supplement (doi:10.1039/d2gc00986b), 2022-01-01
Supplement: d2gc00986b2.xlsx [file d2gc00986b2.xlsx]

## Sheet: Table of Contents
All Supplementary Tables are presented in Corresponding Excel Sheets
Electronic Supplementary Information-2
Systematic QSAR and iQCCR Modelling of Fused/Non-Fused Aromatic Hydrocarbons (FNFAHs) Carcinogenicity to Rodents: Reduce Unnecessary Chemical Synthesis and Animal Testing
Feifan Lia, Tengjiao Fana,b, Guohui Suna,*, Lijiao Zhaoa, Rugang Zhonga, Yongzhen Pengc
aBeijing Key Laboratory of Environmental and Viral Oncology, Faculty of Environment and Life, Beijing University of Technology, Beijing 100124, P. R. China bDepartment of Medical Technology, Beijing Pharmaceutical University of Staff and Workers, Beijing 100079, China cNational Engineering Laboratory for Advanced Municipal Wastewater Treatment and Reuse Technology, Faculty of Environment and Life…
*Corresponding author: Guohui Sun; E-mail address: sunguohui@bjut.edu.cn (G.S); Tel.: +86-10-67391917
Content of Sheets
Table S1. The numbers, CAS No., chemical names, and corresponding TD50 values of FNFAHs for rat and mouse.
Table S2. Statistical parameters used for internal and external validation in this study.
Table S3. Detailed statistical results of the developed QSAR and iQCCR models for the carcinogenicity of FNFAHs
Table S4. Selected molecular descriptors for each QSAR model (as per VIP score).
Table S5. Prediction quality for the RF QSAR model defined by Equation (1) using MAE-based criteria
Table S6. Prediction quality for the RM QSAR model defined by Equation (2) using MAE-based criteria
Table S7. Prediction quality for the MF QSAR model defined by Equation (3) using MAE-based criteria
Table S8. Prediction quality for the MM QSAR model defined by Equation (4) using MAE-based criteria
Table S9. Prediction quality for the Rat QSAR model defined by Equation (5) using MAE-based criteria
Table S10. Prediction quality for the Mouse QSAR model defined by Equation (6) using MAE-based criteria
Table S11. Experimental and predicted pTD50 values, hat values, standardized residuals, descriptor values of all training, test, and unknown external compounds of the female rat QSAR model defined by Equation (1).
Table S12. Experimental and predicted pTD50 values, hat values, standardized residuals, descriptor values of all training, test, and unknown external compounds of the male rat QSAR model defined by Equation (2).
Table S13. Experimental and predicted pTD50 values, hat values, standardized residuals, descriptor values of all training, test, and unknown external compounds of the female mouse QSAR model defined by Equation (3).
Table S14. Experimental and predicted pTD50 values, hat values, standardized residuals, descriptor values of all training, test, and unknown external compounds of the male mouse QSAR model defined by Equation (4).
Table S15. Experimental and predicted pTD50 values, hat values, standardized residuals, descriptor values of all training, test, and unknown external compounds of the rat QSAR model defined by Equation (5).
Table S16. Experimental and predicted pTD50 values, hat values, standardized residuals, descriptor values of all training, test, and unknown external compounds of the mouse QSAR model defined by Equation (6).
Table S17. All the FNFAHs used for constructing the iQCCR models.
Table S18. Experimental and predicted pTD50 values, predicted residuals, hat values and standardized residuals of all training, test, and unknown external compounds of the rat-mouse iQCCR model defined by Equation (7).
Table S19. Experimental and predicted pTD50 values, predicted residuals, hat values and standardized residuals of all training, test, and unknown external compounds of the mouse-rat iQCCR model defined by Equation (8).

## Sheet: Table S1-total comp.
Table S1. The numbers, CAS No., chemical names, and corresponding TD50 values of FNFAHs for rat and mouse.
Modeling compounds			TD50（mg/kg body weight/day)
No.	CAS	Name	Female mouse	Male mouse	Female rat	Male rat
1	26148-68-5	1,9-dihydro-2H-pyrido[2,3-b]indol-2-imine	35.6	122
2	53-96-3	(Z)-N-(9H-fluoren-2-yl)acetimidic acid	4.78	2.35	1.53	1.17
3	81-49-2	1-amino-2,4-dibromoanthracene-9,10-dione	490	467	40.1	102
4	82-28-0	1-amino-2-methylanthracene-9,10-dione	174		115	39.9
5	117-79-3	2-aminoanthracene-9,10-dione	2820	798		101
6	97-56-3	O-Aminoazotoluene			3.7	4.46
7	92-67-1	[1,1'-biphenyl]-4-amine	0.993	3.91
8	3693-22-9	dibenzo[b,d]furan-2-amine		5.73
9	103-33-3	(E)-1,2-diphenyldiazene		3.85	276	122
10	119-53-9	2-hydroxy-1,2-diphenylethan-1-one	84200	3560		88200
11	120-32-1	2-benzyl-4-chlorophenol	684			1580
12	79520-77-7	5,5'-([1,1'-biphenyl]-2,5-diylbis(oxy))bis(2,2-dimethylpentanoic acid)	72.3	45
13	80-05-7	4,4'-(propane-2,2-diyl)diphenol	13100		595
14	2475-45-8	1,4,5,8-tetraaminoanthracene-9,10-dione		534
15	85-68-7	benzyl butyl phthalate	8390	20700	5620	5160
16	101-79-1	4-(4-chlorophenoxy)aniline	225		37.9
17	510-15-6	ethyl 2,2-bis(4-chlorophenyl)-2-hydroxyacetate	848	235		16000
18	10473-70-8	1-(4-chlorophenyl)-1-phenylprop-2-yn-1-yl hydrogen carbonimidate	58.5
19	117-10-2	1,8-dihydroxyanthracene-9,10-dione		201
20	87-29-6	cinnamyl 2-aminobenzoate	2470	2700		9400
21	72-55-9	4,4'-(2,2-dichloroethene-1,1-diyl)bis(chlorobenzene)	9.45	11.1
22	50-29-3	4,4'-(2,2,2-trichloroethane-1,1-diyl)bis(chlorobenzene)	5.82	15
23	1163-19-5	6,6'-oxybis(1,2,3,4,5-pentabromobenzene)	33400	11200	6580	2220
24	262-12-4	dibenzo[b,e][1,4]dioxine			5370
25	33857-26-0	2,7-dichlorodibenzo[b,e][1,4]dioxine		2120		12900
26	115-32-2	2,2,2-trichloro-1,1-bis(4-chlorophenyl)ethan-1-ol		32.9		517
27	5803-51-0	(E)-4-(2,5-dimethoxystyryl)aniline	152
28	91-93-0	4,4'-diisocyanato-3,3'-dimethoxy-1,1'-biphenyl		12100	17100	6600
29	57-41-0	5,5-diphenylimidazolidine-2,4-dione	59.1	116	2080	351
30	72-56-0	4,4'-(2,2-dichloroethane-1,1-diyl)bis(ethylbenzene)	2620	9160	8540
31	324-93-6	4'-fluoro-[1,1'-biphenyl]-4-amine		1.19
32	122-66-7	1,2-diphenylhydrazine	26	1090	18.1	3.7
33	53-95-2	N-(9H-fluoren-2-yl)-N-hydroxyacetamide			1.74	0.69
34	129-43-1	1-hydroxyanthracene-9,10-dione				219
35	6471-49-4	C.I. Pigment Red 23		15100
36	21340-68-1	Methyl clofenapate	25	2.08
37	101-14-4	4,4'-methylenebis(2-chloroaniline)			15.8	10.8
38	101-61-1	4,4'-methylenebis(N,N-dimethylaniline)	207	558	203
39	90-94-8	bis(4-(dimethylamino)phenyl)methanone	53	459	4.87	6.69
40	3771-19-5	Nafenopin			36.6	22.1
41	91-20-3	naphthalene				171
42	2243-62-1	naphthalene-1,5-diamine	129	1640	236	1040
43	91-59-8	naphthalen-2-amine	63
44	81-16-3	2-aminonaphthalene-1-sulfonic acid	876000	379000
45	86-30-6	N,N-diphenylnitrous amide				545000
46	156-10-5	4-nitroso-N-phenylaniline	2250	340	1210	201
47	303-47-9	Ochratoxin A				2.5
48	604-75-1	7-chloro-5-phenyl-3H-benzo[e][1,4]diazepine-2,3-diol	19.8	64.8		34.6
49	101-80-4	4,4'-oxydianiline	108	225	20.1	7.12
50	77-09-08	3,3-bis(4-hydroxyphenyl)isobenzofuran-1(3H)-one				118000
51	135-88-6	2-benzylnaphthalene	5630	1350
52	842-07-9	(E)-1-(phenyldiazenyl)naphthalen-2-ol	833	587	86.5	17.9
53	50-33-9	4-butyl-1,2-diphenylpyrazolidine-3,5-dione	6010	353		1090
54	117-39-5	2-(3,4-dihydroxyphenyl)-3,5,7-trihydroxy-4H-chromen-4-one		15100	75700
55	50-55-5	Reserpine		5.46		6.77
56	83-79-4	Rotenone		0.773
57	599-79-1	Sulfasalazine	1030	2620	8560
58	10048-13-2	Sterigmatocystin				0.0825
59	1746-01-6	2,3,7,8-tetrachlorodibenzo[b,e][1,4]dioxine	0.000756	8.68e-05	0.000127	0.000391
60	96-69-5	4,4'-thiobis(2-(tert-butyl)-5-methylphenol)			3990	324
61	139-65-1	4,4'-thiodianiline	33.3	33.2	42	7.18
62	76-87-9	triphenylstannanol	136	112
63	2832-40-8	(Z)-N-(4-((E)-(2-hydroxy-5-methylphenyl)diazenyl)phenyl)acetimidic acid	1020		46800	833
64	6358-85-6	C.I. Pigment Yellow 12			71900
65	128-66-5	dibenzo[c,pqr]tetraphene-7,14-dione	23900	8610		2790
66	50594-66-6	5-(2-chloro-4-(trifluoromethyl)phenoxy)-2-nitrobenzoic acid	328	149	126	93.8
67	129-15-7	2-methyl-1-nitroanthracene-9,10-dione			324	48.8
68	602-87-9	5-nitro-1,2-dihydroacenaphthylene	45.8			71.4
69	2425-85-6	(E)-1-((4-methyl-2-nitrophenyl)diazenyl)naphthalen-2-ol	204000	17900	5240	5170
Excluded compounds (organic salts, mixtures, polymers and metal complexes)
70	113-92-8	Chlorpheniramine maleate
71	134-72-5	Ephedrine sulphate
72	54965-24-1	Tamoxifen citrate
73	1330-78-5	Tricresyl phosphate
74	111011-76-8	Efonidipine.hcl ethanolate
75	1420-04-8	Clonitralid
76	1937-37-7	C.i. direct black 38
77	2602-46-2	C.i. direct blue 6
78	2429-74-5	C.i. direct blue 15
79	28407-37-6	C.i. direct blue 218
80	16071-86-6	C.i. direct brown 95
81	7336-20-1	4,4'-diamino-2,2'-stilbenedisulfonic acid, disodium
82	4680-78-8	Fd & c green no. 1
83	5141-20-8	Fd & c green no. 2
84	1936-15-8	C.i. acid orange 10
85	6459-94-5	C.i. acid red 114
86	3567-69-9	C.i. food red 3
87	3761-53-3	D & c red no. 5
88	3564-09-8	Fd & c red no. 1
89	6385-58-6	Sodium bithionolate
90	6373-74-6	C.i. acid orange 3
91	6109-97-3	3-amino-9-ethylcarbazole.hcl
92	612-82-8	3,3'-dimethylbenzidine.2hcl
93	147-24-0	Diphenhydramine.hcl
94	316-42-7	Emetine.2hcl
95	59333-67-4	Fluoxetine.hcl
96	64049-29-2	4,4'-methylene-bis(2-chloroaniline).2hcl
97	13552-44-8	4,4'-methylenedianiline.2hcl
98	1465-25-4	N-(1-naphthyl)ethylenediamine.2hcl
99	63-92-3	Phenoxybenzamine.hcl
100	2198-59-6	N-phenyl-p-phenylenediamine.hcl
101	952-23-8	Proflavine.hcl hemihydrate
102	58-33-3	Promethazine.hcl
103	989-38-8	Rhodamine 6g
104	569-61-9	P-rosaniline.hcl
105	7411-49-6	3,3',4,4'-tetraaminobiphenyl.4hcl
106	2783-94-0	Fd & c yellow no. 6
107	5160-02-1	D & c red no. 9
External validation set (without experimental values)
NO.	CAS	Name	MW	ALOGP
108	4075-79-0	4-acetylaminobiphenyl	211.264	2.469
109	28314-03-6	1-Acetylaminofluorene	223.275	2.613
110	28322-02-3	4-Acetylaminofluorene	223.275	2.613
111	3693-22-9	2-Dibenzofuranamine	183.21	2.587
112	84-65-1	9,10-Anthracenedione	208.216	2.808
113	68844-77-9	Astemizole	458.58	5.69
114	64896-26-0	Benzalazine	208.264	3.495
115	92-87-5	Benzidine	184.242	1.855
116	50-32-8	Benzo(a)pyrene	252.316	4.854
117	120-78-5	Dibenzothiazyl disulfide	332.472	5.79
118	92-52-4	Biphenyl	154.212	3.348
119	145040-37-5	Candesartan cilexetil	610.671	7.354
120	63-25-2	Carbaryl	201.225	3.204
121	86-74-8	Carbazole	167.211	3.323
122	80-33-1	Chlorfenson	303.153	4.294
123	2227-13-6	Tetrasul	324.04	6.606
124	94-20-2	Chlorpropamide	276.735	2.058
125	22494-47-9	Clobuzarit	304.77	4.069
126	477-30-5	Demecolcine	371.433	2.128
127	65765-07-3	3-Hydroxyproquazone	294.354	4.172
128	80-08-0	Dapsone	248.3	1.439
129	53-19-0	Mitotane	320.034	5.746
130	52918-63-5	Deltamethrin	505.206	5.629
131	131-01-1	Deserpidine	578.622	4.365
132	63019-65-8	N-1-Diacetamidofluorene	265.312	2.603
133	538-41-0	4,4'-Diaminoazobenzene	212.256	2.706
134	785-30-8	4,4'-Diaminobenzanilide	277.267	1.121
135	439-14-5	Diazepam	284.743	3.385
136	53-70-3	Dibenz(a,h)anthracene	278.354	5.464
137	4106-66-5	3-Aminodibenzofuran	183.21	2.587
138	117-80-6	2,3-Dichlor-1,4-naphthochinon	227.04	2.495
139	91-94-1	3,3'-Dichlorobenzidine	253.126	3.184
140	97-16-5	2,4-Dichlorophenyl benzenesulfonate	303.153	4.294
141	56-53-1	Diethylstilbestrol	268.356	5.087
142	21626-89-1	Diftalone	264.284	1.79
143	65176-75-2	5,6-Dimethoxysterigmatocystin	384.38	2.167
144	60-11-7	4-(Dimethylamino)azobenzene	225.295	4.362
145	57-97-6	7,12-Dimethylbenz(a)anthracene	256.348	5.528
146	74-31-7	p-Phenylenediamine, N,N'-diphenyl-	260.34	4.93
147	86-29-3	Diphenylacetonitrile	193.249	3.238
148	102-09-0	Diphenyl carbonate	214.22	3.818
149	40762-15-0	Doxefazepam	348.758	2.711
150	476-66-4	Ellagic acid	302.194	1.483
151	29975-16-4	Estazolam	294.742	3.466
152	22966-79-6	Estradiol mustard	788.672	10.606
153	842-00-2	4-Ethylsulfonylnaphthalene-1-sulfonamide	299.359	1.441
154	51630-58-1	Fenvalerate	419.905	6.671
155	363-17-7	Acetamide, N-fluoren-2-yl-2,2,2-trifluoro-	277.246	3.702
156	398-32-3	4'-Fluoro-4-biphenylacetamide	229.254	2.591
157	93957-54-1	Fluvastatin	411.473	4.219
158	517-28-2	Hematoxylin	302.282	1.59
159	70-30-4	Hexachlorophene	406.889	7.256
160	103-16-2	Monobenzone	200.237	3.13
161	4463-22-3	N-Hydroxy-4-acetylaminobiphenyl	277.263	2.112
162	4363-03-5	3-Hydroxy-4-aminobiphenyl	185.226	2.334
163	53-86-1	Indomethacin	357.79	4.21
164	101-73-5	4-Isopropoxydiphenylamine	227.307	4.09
165	520-18-3	Kaempferol	286.239	1.771
166	22071-15-4	Ketoprofen	254.285	3.336
167	50264-69-2	Lonidamine	321.157	4.625
168	67-98-1	Ethamoxytriphetol	419.565	5.402
169	80830-39-3	3-Methoxy-4-aminoazobenzene	227.267	3.436
170	3544-23-8	2-Methoxy-4-aminoazobenzene	227.267	3.436
171	5834-17-3	2-Methoxy-3-dibenzofuranamine	213.236	2.57
172	72-43-5	Methoxychlor	345.644	4.969
173	55-80-1	3-Methyl-4'-(dimethylamino)azobenzene	239.322	4.848
174	11013-97-1	Methyl hesperidin	624.592	-0.231
175	16699-10-8	4-(4-N-Methyl-N-nitrosaminostyryl)quinoline	289.338	3.84
176	56-49-5	3-Methylcholanthrene	268.359	5.642
177	838-88-0	4,4'-Methylene bis(2-methylaniline)	226.323	3.284
178	119-47-1	p-Cresol, 2,2'-methylenebis(6-tert- butyl-	340.507	7.043
179	90-12-0	1-Methylnaphthalene	142.201	3.225
180	5800-19-1	Metiapine	323.458	4.338
181	86-86-2	2-(1-Naphthyl)acetamide	185.226	1.775
182	86-87-3	alpha-Naphthylacetic acid	186.21	2.378
183	93-46-9	p-Phenylenediamine, N,N'-(di-2-naphthyl)-	360.46	6.747
184	86-88-4	1-(1-Naphthyl)-2-thiourea	202.275	2.548
185	51715-17-4	N-Nitrosochlordiazepoxide	328.756	2.338
186	27753-52-2	Nonabromobiphenyl	864.276	10.084
187	94-36-0	Benzoyl peroxide	242.23	3.166
188	3096-50-2	2-Acetylaminofluoren-9-one	237.158	2.043
189	92-84-2	Phenothiazine	199.271	3.668
190	71835-85-3	Phenylethyl 3-methylcaffeate	298.338	3.774
191	90-43-7	2-Phenylphenol	170.211	3.081
192	92-69-3	4-Hydroxybiphenyl	170.211	3.081
193	2955-38-6	Prazepam	324.808	4.205
194	54-80-8	Pronetalol	229.323	2.492
195	22760-18-5	Proquazone	278.355	4.44
196	1508-45-8	Mitopodozide	474.51	1.737
197	81-54-9	Purpurin	256.213	2.006
198	13292-46-1	Rifampin	822.953	4.103
199	77-46-3	Acedapsone	332.374	2.577
200	27470-51-5	Suxibuzone	438.48	3.479
201	569-57-3	Chlorotrianisene	380.868	5.614
202	846-50-4	Temazepam	300.742	3.045
203	15721-02-5	2,2',5,5'-Tetrachlorobenzidine	322.01	4.513
204	116-29-0	Tetradifon	356.038	5.59
205	97-18-7	Bithionol	356.038	6.071
206	458-37-7	Curcumin	368.385	3.224
207	865-21-4	Vinblastine	810.989	4.887
208	5979-28-2	Pigment yellow 16	726.436	9.632
209	5567-15-7	C.I. Pigment Yellow 83	818.486	9.998
210	304-28-9	2,7-Diacetylaminofluorene	280.367	1.734
211	23214-92-8	Doxorubicin	543.525	-0.021
212	5522-43-0	1-Nitropyrene	247.253	3.84
213	3096-50-2	2-Acetylaminofluoren-9-one	237.258	2.043
Excluded external compounds (organic salts, mixtures, polymers and metal complexes)
214	2465-27-2	Auramine-o
215	531-85-1	Benzidine.2hcl
216	2519-30-4	Black pn
217	3844-45-9	Fd & c blue no. 1
218	860-22-0	Fd & c blue no. 2
219	59721-29-8	Camostat mesylate
220	4553-89-3	Chocolate brown ht
221	43054-45-1	Clomiphene citrate
222	10380-28-6	Copper-8-hydroxyquinoline
223	35660-60-7	O,s-dibenzoyl thiamine.hcl
224	75659-08-4	(r,r)-dilevalol.hcl
225	43033-72-3	6-dimethylamino-4,4-diphenyl-3-heptanol acetate.hcl
226	1095-90-5	6-dimethylamino-4,4-diphenyl-3-heptanone.hcl
227	548-62-9	Gentian violet
228	2353-45-9	Fd & c green no. 3
229	115436-74-3	Ipazilide fumarate
230	155-04-4	2-mercaptobenzothiazole, zinc
231	41372-08-1	Methyldopa
232	132-27-4	O-phenylphenol, sodium
233	150821-03-7	Pranlukast hydrate
234	51-02-5	Pronethalol.hcl
235	318-98-9	Propranolol.hcl
236	2611-82-7	Sx purple
237	6151-25-3	Quercetin dihydrate
238	82586-55-8	Quinapril.hcl
239	3567-69-9	C.i. food red 3
240	1248-18-6	D & c red no. 10
241	3564-09-8	Fd & c red no. 1
242	915-67-3	Fd & c red no. 2
243	16423-68-0	Fd & c red no. 3
244	4548-53-2	Fd & c red no. 4
245	3520-42-1	Food red no. 106
246	632-99-5	Rosaniline.hcl
247	12768-44-4	Rutin sulfate
248	6485-34-3	Saccharin, calcium
249	900-95-8	Fentin acetate
250	1694-09-3	Fd & c violet no. 1
251	1934-21-0	Fd & c yellow no. 5
252	89226-75-5	Manidipine.2hcl

## Sheet: Table S2
Table S2. Statistical parameters used for internal and external validation in this study.
Parameters	Meaning	References
R2	Coefficient of determination	Golbraikh et al. J. Mol. Graph. Model., 2002, 20, 269-276.; Golbraikh A. et al. J. Comput.-Aided Mol. Des., 2003, 17, 241-253.; Tropsha et al. QSAR Comb. Sci., 2003, 22, 69-77.; Gramatica P. QSAR Comb. Sci., 2007, 26, 694-701.; Tropsha, A. Mol. Inf., 2010, 29, 476-488.
Radj2	Adjusted coefficient of determination
RMSEtrain	Root mean squared error of the training set
F	Fisher statistics
QLOO2	Leave-one-out cross-validation correlation coefficient
QLMO2	Leave-many-out cross-validation correlation coefficient
RMSEcv	Cross-validation root mean squared error
RYscr2 and QYscr2	New coefficients of determination following Y-scrambling procedure with 2000 iterations
R02	The squared correlation coefficient of predicted values vs. experimental values based on the regression line through the origin
R'02	The squared correlation coefficient of experimental values vs. predicted values based on the regression line through the origin
k	The slope of the regression line through the origin (predicted values vs. experimental values)
k'	The slope of the regression line through the origin (experimental values vs. predicted values)
CCCcv	Cross-validation concordance correlation coefficient	Lin L. Biometrics, 1989, 45, 255-268; Lin L. Biometrics 1992, 48, 599-604.
CCCtrain	Concordance correlation coefficient of the training set
QUIK rule	Minimizes the inter-correlation between descriptors	Todeschini et al. Chemom. Int. Lab. Syst., 1999, 46, 13-29
Rtest2	Coefficient of determination of the test set	Golbraikh et al. J. Mol. Graph. Model., 2002, 20, 269-276.
RMSEtest	Root mean squared error of the test set	Aptula et al. QSAR Comb. Sci. 2005, 24, 385-396.
Qext-F12	External Q2 functions	Shi et al. J. Chem. Inf. Comput. Sci., 2001, 41, 186-195.
Qext-F22	External Q2 functions	Consonni et al. J. Chem. Inf. Model., 2009, 49, 1669-1678.
Qext-F32	External Q2 functions
CCCtest	Concordance correlation coefficient of the test set	Chirico et al. J. Chem. Inf. Model., 2011, 51, 2320-2335.; Chirico et al. J. Chem. Inf. Model., 2012, 52, 2044-2058.
MAEtrain	Mean absolute error of the training set	Roy et al. Chemom. Int. Lab. Syst., 2016, 152, 18-33.；Gramatica et al. J. Chem. Inf. Model. 2016, 56(6), 1127-1131.
MAEtest	Mean absolute error of the test set
SD	Standard deviation
rm2 and Δrm2	Validation metrics	Ojha et al. Chemom. Int. Lab. Syst., 2011, 107, 194-205.;Roy et al. J. Chemom. 2018, 32, e2992.

## Sheet: Table S3
Table S3. Detailed statistical results of the developed QSAR and iQCCR models for the carcinogenicity of FNFAHs
model	Division method		Ntr	Ntest	descriptor	R2	R2adj	R2-R2adj	RMSEtr	MAEtr	CCCtr	Q2LOO	R2-Q2LOO	RMSEcv	MAEcv	PRESScv	CCCcv	R2Yscr	Q2Yscr	R2test	Q2F1	Q2F2	Q2F3	CCCtest	r2maver.	r2m delta	RMSEtest	MAEtest	PRESStest
Female rat
Padel descriptors add Dragon descriptors	response	prediction	25	8	5 （MATS5m MATS6v minsCH3 nAtomP nFG12Ring ）	0.8416	0.8	0.0417	0.7083	0.5602	0.914	0.7338	0.1078	0.9183	0.7351	21.0813	0.8535	0.2051	-0.4183	0.7939	0.8066	0.7335	0.8794	0.8691	0.7116	0.1544	0.618	0.5401	3.0551
	structure	prediction	25	8	5 （MATS5m MATS6v minsCH3 nAtomP nFG12Ring ）	0.8368	0.7939	0.0429	0.7221	0.5729	0.9112	0.7235	0.1134	0.94	0.7547	22.0901	0.848	0.2119	-0.4181	0.8767	0.8026	0.7582	0.8863	0.878	0.6967	0.1371	0.6026	0.5334	2.9053
	random	30	25	8	5（MATS5m MATS6v minsCH3 nAtomP nFG12Ring ）	0.817	0.7688	0.0482	0.7483	0.6334	0.8993	0.693	0.124	0.9691	0.8227	23.4807	0.8334	0.2047	-0.4705	0.9561	0.8972	0.8955	0.9263	0.9547	0.9334	0.0384	0.4747	0.3659	1.8029
	Full model		33		5 （MATS5m MATS6v minsCH3 nAtomP nFG12Ring ）	0.8401	0.8104	0.0296	0.6748	0.5294	0.9131	0.7698	0.0702	0.8095	0.6428	21.6226	0.8737
Dragon descriptors	response	prediction	25	8	5 （ X1A MATS5v MATS6v P_VSA_LogP_6 nArOH ）	0.9057	0.8809	0.0248	0.5507	0.4393	0.9505	0.7341	0.1716	0.9247	0.6786	21.377	0.8729	0.2214	-0.7112	0.8007	0.6982	0.6739	0.8382	0.8658	0.7231	0.0969	0.7214	0.6177	4.1628
	structure	prediction	25	8	5 （ X1A MATS5v MATS6v P_VSA_LogP_6 nArOH ）	0.8753	0.8424	0.0328	0.627	0.5176	0.9335	0.7516	0.1236	0.8847	0.7041	19.567	0.8615	0.2101	-0.4373	0.8037	0.9121	0.7819	0.9381	0.883	0.7217	0.0783	0.4415	0.3429	1.5591
	random	30	25	8	5（ X1A MATS5v MATS6v P_VSA_LogP_6 nArOH ）	0.8777	0.8456	0.0322	0.6228	0.5047	0.9349	0.7697	0.108	0.8548	0.6841	18.2662	0.8755	0.2123	-0.4299	0.9205	0.8988	0.8973	0.9415	0.9539	0.8481	0.0737	0.4308	0.3352	1.485
	Full model		33		5 （ X1A MATS5v MATS6v P_VSA_LogP_6 nArOH ）	0.8832	0.8616	0.0216	0.5767	0.4602	0.938	0.8145	0.0687	0.7267	0.5759	17.4265	0.9001
Padel descriptors	response	prediction	25	8	4 （maxaasC ETA_EtaP ETA_EtaP_B nFRing ）	0.6984	0.6381	0.0603	0.9848	0.8029	0.8224	0.4905	0.2079	1.28	1.0325	40.9596	0.7009	0.1658	-0.4002	0.0979	-0.4487	-0.5654	0.2232	0.2024	0.0101	0.1446	1.5805	1.4736	19.9846
	structure	training	27	6	4 （maxaasC ETA_EtaP ETA_EtaP_B nFRing ）	0.6424	0.5743	0.0681	1.0273	0.8621	0.7823	0.3743	0.2681	1.3589	1.1062	48.0134	0.6261	0.1582	-0.3271	0.3823	0.2191	0.2178	0.3496	0.6132	0.2514	0.0408	1.3856	1.1973	13.4384
	random	30	25	8	4 （maxaasC ETA_EtaP ETA_EtaP_B nFRing ）	0.6318	0.5582	0.0736	1.115	0.9324	0.7744	0.4068	0.2251	1.4154	1.1793	50.0846	0.6432	0.1676	-0.3377	0.5859	-0.3172	-0.6112	0.5147	0.625	0.3729	0.3205	1.2802	1.1462	13.1114
	Full model		33		4 （maxaasC ETA_EtaP ETA_EtaP_B nFRing ）	0.5784	0.5182	0.602	1.0955	0.8852	0.7325	0.3906	0.1878	1.3171	1.0518	57.2428	0.6165
Male rat
Padel descriptors add Dragon descriptors	response	training	33	10	6 (J_D ATSC3s GATS5s ATSc4 SHaaCH minaaCH )	0.6256	0.5392	0.0864	1.1166	0.8387	0.7697	0.421	0.2046	1.3886	1.0935	63.627	0.6711	0.1877	-0.5576	0.7183	0.627	0.6255	0.8203	0.7757	0.6079	0.2056	0.7736	0.7123	5.984
	remove only one outlier		32	10	6 (J_D ATSC3s GATS5s ATSc4 SHaaCH minaaCH )	0.7274	0.662	0.0654	0.9494	0.7997	0.8422	0.5048	0.2226	1.2796	1.0938	52.3978	0.7441	0.1934	-0.5953	0.8174	0.756	0.7559	0.8821	0.8634	0.7425	0.0968	0.6245	0.5686	3.8999
	structure	prediction	33	10	6 (J_D ATSC3s GATS5s ATSc4 SHaaCH minaaCH )	0.6302	0.5448	0.0853	1.0662	0.7861	0.7731	0.4174	0.2127	1.3382	1.0262	59.0945	0.6576	0.1854	-0.545	0.7069	0.6205	0.6204	0.6978	0.832	0.6046	0.083	0.9639	0.8758	9.2904
	random	30	32	11	6 (J_D ATSC3s GATS5s ATSc4 SHaaCH minaaCH )	0.5895	0.4948	0.0947	0.934	0.6972	0.7417	0.4394	0.1501	1.0915	0.8416	39.3128	0.6557	0.189	-0.5273	0.6255	0.6715	0.6144	0.1068	0.7673	0.5036	0.1738	1.3777	1.1385	18.9818
	Full model		43		6 (J_D ATSC3s GATS5s ATSc4 SHaaCH minaaCH )	0.6372	0.5768	0.0605	1.0307	0.7914	0.7784	0.4937	0.1435	1.2176	0.9593	63.7483	0.7073
Dragon descriptors	response	prediction	30	13	6 （RBF J_D MATS5v MATS8e P_VSA_ppp_ar Eig03_EA(dm) ）	0.775	0.7163	0.0587	0.809	0.596	0.8733	0.6219	0.1531	1.0488	0.7846	32.9989	0.79	0.2069	-0.3919	0.413	0.1219	0.0686	0.0869	0.5798	0.2732	0.1664	1.6298	0.9469	34.5318
	structure	training	31	12	6 （RBF J_D MATS5v MATS8e P_VSA_ppp_ar Eig03_EA(dm) ）	0.6292	0.5365	0.0927	1.1145	0.8034	0.7724	0.2496	0.3796	1.5855	1.0881	77.9314	0.58	0.198	-0.3718	0.4982	0.1649	-0.1087	0.5078	0.6516	0.2965	0.3472	1.2841	1.0104	19.7865
	random	30	33	10	6 （RBF J_D MATS5v MATS8e P_VSA_ppp_ar Eig03_EA(dm) ）	0.7194	0.6546	0.0648	0.6825	0.498	0.8368	0.5935	0.1258	0.8214	0.6187	22.2642	0.7685	0.1856	-0.3823	0.5325	0.5418	0.4765	-1.0225	0.6919	0.3679	0.2667	1.8322	1.3091	33.5709
	Full model		43		6 （RBF J_D MATS5v MATS8e P_VSA_ppp_ar Eig03_EA(dm) ）	0.6286	0.5667	0.0619	1.0428	0.6948	0.772	0.4502	0.1785	1.2689	0.8366	69.2335	0.6699
Padel descriptors	response	training	33	10	5（Total Energy SHaaCH SaaCH ETA_BetaP_s nAtomP）	0.5014	0.4091	0.0923	1.2885	0.9692	0.6679	0.2586	0.2428	1.5713	1.1874	81.4776	0.5095	0.1566	-0.3352	0.5842	0.5503	0.5484	0.7833	0.6974	0.4066	0.3131	0.8495	0.642	7.2158
	structure	training	34	9	5（Total Energy SHaaCH SaaCH ETA_BetaP_s nAtomP）	0.5559	0.4765	0.0793	1.1939	0.8647	0.7145	0.3444	0.2115	1.4505	1.0607	71.5355	0.5855	0.15	-0.3187	0.2069	0.0419	0.0049	0.4381	0.4414	0.1007	0.027	1.3428	1.1714	16.2288
	random	25	33	10	5（Total Energy SHaaCH SaaCH ETA_BetaP_s nAtomP）	0.6219	0.5519	0.07	0.9552	0.7685	0.7669	0.4329	0.189	1.1699	0.9482	45.1654	0.6584	0.1574	-0.3479	0.3439	0.2714	0.2713	-0.3973	0.5463	0.1979	0.2483	1.8363	1.1903	33.7202
	Full model		43		5（Total Energy SHaaCH SaaCH ETA_BetaP_s nAtomP）	0.5119	0.446	0.066	1.1955	0.8923	0.6772	0.3352	0.1768	1.3953	1.0341	87.7165	0.5628
Female mouse
Padel descriptors add Dragon descriptors	response	training	33	10	6 （J_D SpMaxA_B(s) GATS8s SpMax2_Bh(v) Cl-089 minaaaC ）	0.8231	0.7823	0.0408	0.6489	0.5232	0.903	0.7387	0.0845	0.7887	0.6493	20.5292	0.8543	0.1849	-0.3853	0.7715	0.7754	0.7592	0.7968	0.8783	0.6885	0.0242	0.6955	0.5546	4.8373
	structure	training	33	10	6 （J_D SpMaxA_B(s) GATS8s SpMax2_Bh(v) Cl-089 minaaaC ）	0.8324	0.7937	0.0387	0.6294	0.4953	0.9085	0.7412	0.0912	0.7821	0.625	20.1847	0.8554	0.1869	-0.3822	0.7291	0.7415	0.7161	0.7567	0.8519	0.6354	0.0212	0.7582	0.6492	5.7481
	random	30	33	10	6 （J_D SpMaxA_B(s) GATS8s SpMax2_Bh(v) Cl-089 minaaaC ）	0.8132	0.7701	0.0431	0.6787	0.5548	0.897	0.7155	0.0977	0.8376	0.6988	23.1528	0.8357	0.1895	-0.3625	0.8264	0.8126	0.8082	0.8597	0.8809	0.623	0.1844	0.5882	0.5038	3.4603
	Full model		43		6 （J_D SpMaxA_B(s) GATS8s SpMax2_Bh(v) Cl-089 minaaaC ）	0.7884	0.7531	0.0353	0.7006	0.5761	0.8817	0.6944	0.094	0.842	0.6986	30.4825	0.8247
Dragon descriptors	response	training	33	10	6 （J_Dz(e) SpMax_B(s) JGI8 SpMax2_Bh(v) P_VSA_LogP_5 Cl-089 ）	0.7907	0.7424	0.0483	0.7495	0.6192	0.8831	0.6749	0.1158	0.9342	0.7932	28.7984	0.8124	0.1851	-0.3838	0.7166	0.711	0.7092	0.8796	0.8443	0.6106	0.1023	0.5686	0.4716	3.233
	structure	prediction	32	11	6 （J_Dz(e) SpMax_B(s) JGI8 SpMax2_Bh(v) P_VSA_LogP_5 Cl-089 ）	0.7986	0.7503	0.0483	0.6478	0.5465	0.888	0.6169	0.1817	0.8934	0.7303	25.5413	0.7654	0.1923	-0.3863	0.7684	0.6881	0.5687	0.5154	0.7053	0.236	0.4814	1.0048	0.8514	11.1049
	random	25	33	10	6 （J_Dz(e) SpMax_B(s) JGI8 SpMax2_Bh(v) P_VSA_LogP_5 Cl-089 ）	0.7683	0.7149	0.0535	0.7247	0.5899	0.869	0.6239	0.1445	0.9235	0.7633	28.142	0.7769	0.1898	-0.3555	0.8378	0.8211	0.806	0.7996	0.8868	0.7725	0.1282	0.6741	0.6044	4.5439
	Full model		43		6 （J_Dz(e) SpMax_B(s) JGI8 SpMax2_Bh(v) P_VSA_LogP_5 Cl-089 ）	0.7858	0.7502	0.0357	0.7048	0.5758	0.8801	0.7034	0.0824	0.8295	0.6884	29.586	0.8309
Padel descriptors	response	training	33	10	6 （SC-5 SPC-5 minaaCH maxaasC ETA_dEpsilon_B ETA_BetaP_s ）	0.6689	0.5925	0.0764	0.9428	0.7747	0.8016	0.4371	0.2318	1.2293	1.0336	49.8656	0.6483	0.1872	-0.7408	0.6227	0.5592	0.5565	0.8163	0.784	0.4985	0.0224	0.7022	0.63	4.9304
	structure	prediction	33	10	6 （SC-5 SPC-5 minaaCH maxaasC ETA_dEpsilon_B ETA_BetaP_s ）	0.6779	0.6036	0.0743	0.8809	0.6875	0.808	0.4678	0.2101	1.1323	0.8899	42.3125	0.6604	0.1876	-0.6355	0.6253	0.5599	0.5513	0.6284	0.6472	0.2175	0.4789	0.9461	0.7789	8.952
	random	30	33	10	6 （SC-5 SPC-5 minaaCH maxaasC ETA_dEpsilon_B ETA_BetaP_s ）	0.6801	0.6062	0.0738	0.8692	0.6918	0.8096	0.4557	0.2244	1.1337	0.9166	42.4174	0.6868	0.1862	-0.5175	0.5085	0.5066	0.3508	0.5171	0.6807	0.3724	0.1646	1.0679	0.9459	11.4046
	Full model		43		6 （SC-5 SPC-5 minaaCH maxaasC ETA_dEpsilon_B ETA_BetaP_s ）	0.6611	0.6047	0.0565	0.8866	0.7209	0.796	0.5361	0.1251	1.0374	0.8594	46.2803	0.7152
Male mouse
Padel descriptors add Dragon descriptors	response	training	34	12	7（CIC4 MATS4s GATS7e P_VSA_MR_7 B10[C-C] VCH-6 maxwHBa ）	0.6918	0.6088	0.083	0.9506	0.6498	0.8178	0.4427	0.2491	1.2783	0.8709	55.558	0.6676	0.2132	-0.4103	0.6835	0.5843	0.577	0.761	0.8182	0.5699	0.1899	0.8371	0.7056	8.4083
	structure	training	36	10	7（CIC4 MATS4s GATS7e P_VSA_MR_7 B10[C-C] VCH-6 maxwHBa ）	0.6753	0.5941	0.0812	1.0055	0.7339	0.8062	0.4629	0.2124	1.2932	0.9499	60.2013	0.6764	0.1973	-0.4623	0.8802	0.7952	0.786	0.9486	0.9133	0.6866	0.1437	0.4002	0.3488	1.6016
	remove only one outlier		35	10	7（CIC4 MATS4s GATS7e P_VSA_MR_7 B10[C-C] VCH-6 maxwHBa ）	0.6917	0.6117	0.0799	0.7852	0.6346	0.8177	0.5	0.1944	1.0026	0.8241	35.1819	0.7006	0.2007	-0.4852	0.8698	0.8428	0.8428	0.9411	0.9219	0.813	0.0673	0.3431	0.2788	1.177
	random	30	36	10	7（CIC4 MATS4s GATS7e P_VSA_MR_7 B10[C-C] VCH-6 maxwHBa ）	0.6827	0.6034	0.0793	0.9693	0.695	0.8115	0.46	0.2227	1.2645	0.9191	57.5611	0.6702	0.2016	-0.4675	0.6563	0.6027	0.2899	0.8039	0.6841	0.5325	0.1271	0.7621	0.5857	5.8082
	Full model		46		7（CIC4 MATS4s GATS7e P_VSA_MR_7 B10[C-C] VCH-6 maxwHBa ）	0.6844	0.6223	0.0581	0.9066	0.645	0.8127	0.5254	0.159	1.11189	0.784	56.8662	0.7163
Dragon descriptors	response	training	35	11	7 (O% GATS7e SpMax3_Bh(s) P_VSA_MR_7 B10[C-C] F01[C-O] DLS_03 )	0.6904	0.6102	0.0803	0.9443	0.7175	0.8169	0.3923	0.2981	1.323	0.974	61.263	0.6554	0.21	-0.3967	0.5897	0.0279	0.0152	0.4151	0.6181	0.4499	0.2356	1.298	1.0847	18.5335
	structure	training	35	11	7 (O% GATS7e SpMax3_Bh(s) P_VSA_MR_7 B10[C-C] F01[C-O] DLS_03 )	0.6768	0.593	0.0838	0.9745	0.6937	0.8073	0.4167	0.2601	1.3092	0.9136	59.9905	0.6609	0.2031	-0.3986	0.4798	0.3427	0.311	0.651	0.683	0.3437	0.0045	1.0126	0.8067	11.2801
	random	25	35	11	7 (O% GATS7e SpMax3_Bh(s) P_VSA_MR_7 B10[C-C] F01[C-O] DLS_03 )	0.6932	0.6136	0.0795	0.9315	0.675	0.8188	0.3518	0.3414	1.3539	0.9173	64.1587	0.6234	0.2028	-0.377	0.5154	0.2546	-0.0654	0.4618	0.6659	0.3352	0.3296	1.2337	0.9874	16.7424
	Full model		46		7 (O% GATS7e SpMax3_Bh(s) P_VSA_MR_7 B10[C-C] F01[C-O] DLS_03 )	0.642	0.5761	0.0659	0.9657	0.6903	0.782	0.4512	0.1908	1.1956	0.8477	65.7566	0.6758
Padel descriptors	response	training	35	11	6 (Total Energy SC-3 minaaaC ETA_EtaP MDEO-11 nHeteroRing)	0.6204	0.5391	0.0813	1.0456	0.7966	0.7658	0.413	0.2074	1.3003	0.9961	59.1796	0.6672	0.1749	-0.3618	0.4912	-0.4274	-0.446	0.1412	0.5346	0.3509	0.1096	1.5729	1.309	27.2131
	structure	prediction	32	14	6 (Total Energy SC-3 minaaaC ETA_EtaP MDEO-11 nHeteroRing)	0.5703	0.4672	0.1031	1.1807	0.8293	0.7263	0.4081	0.1622	1.3857	1.007	61.4489	0.6355	0.1945	-0.4184	0.6312	-0.1477	-0.2727	0.5828	0.6714	0.4305	0.2974	1.1633	0.9846	18.9464
	random	25	35	11	6 (Total Energy SC-3 minaaaC ETA_EtaP MDEO-11 nHeteroRing)	0.6221	0.5412	0.081	0.8442	0.666	0.7671	0.4745	0.1476	0.9954	0.818	34.682	0.685	0.1707	-0.3694	0.5446	0.376	0.3136	-0.6549	0.4038	-0.0283	0.7468	1.7666	1.1797	34.3294
	Full model		46		6 (Total Energy SC-3 minaaaC ETA_EtaP MDEO-11 nHeteroRing)	0.5343	0.4627	0.0716	1.1014	0.7689	0.6965	0.423	0.1113	1.226	0.8876	69.1398	0.6364
Rat
Padel descriptors add Dragon descriptors	response	training	39	12	7（SHaaCH SIC1 J_D MATS5m SpMAD_EA SM03_EA(bo) nArOH）	0.635	0.5526	0.0824	1.0889	0.7996	0.7768	0.4683	0.1667	1.3142	0.9948	67.3624	0.6701	0.1841	-0.3381	0.7327	0.7225	0.7115	0.8539	0.8471	0.6299	0.1591	0.689	0.5694	5.6968
	structure	training	40	11	7（SHaaCH SIC1 J_D MATS5m SpMAD_EA SM03_EA(bo) nArOH）	0.6277	0.5463	0.0814	1.0844	0.7983	0.7713	0.4718	0.1559	1.2916	0.9831	66.7325	0.6699	0.1783	-0.3254	0.7921	0.7843	0.7809	0.871	0.8882	0.7121	0.0051	0.6382	0.493	4.4807
	remove only one outlier		39	11	7（SHaaCH SIC1 J_D MATS5m SpMAD_EA SM03_EA(bo) nArOH）	0.7382	0.6791	0.0591	0.9103	0.7252	0.8494	0.6023	0.136	1.1221	0.9106	49.1022	0.7698	0.1792	-0.3445	0.7986	0.759	0.7569	0.8572	0.8895	0.718	0.152	0.6723	0.56	4.9715
	random	25	39	12	7（SHaaCH SIC1 J_D MATS5m SpMAD_EA SM03_EA(bo) nArOH）	0.6322	0.5517	0.0805	1.0857	0.7931	0.7747	0.4671	0.1651	1.3068	0.9758	68.3111	0.6648	0.175	-0.3401	0.7537	0.6788	0.6684	0.8273	0.8474	0.6626	0.05	0.7441	0.6154	6.0898
	Full model		51		7（SHaaCH SIC1 J_D MATS5m SpMAD_EA SM03_EA(bo) nArOH）	0.7503	0.7119	0.0384	0.8517	0.5893	0.8574	0.67	0.0803	0.9791	0.6893	72.8497	0.809
Mouse
Padel descriptors add Dragon descriptors	response	prediction	41	14	8（MATS6e SpMax8_Bh(e) P_VSA_LogP_5 P_VSA_MR_7 SpMaxA_EA(dm) CATS2D_07_PL minaaCH ETA_dBeta）	0.582	0.4775	0.1045	1.016	0.791	0.7358	0.2689	0.313	1.3436	1.0387	74.0158	0.518	0.1992	-0.3616	0.748	0.6743	0.6595	0.7172	0.8524	0.6573	0.089	0.8357	0.6783	9.7783
	structure	training	45	10	8（MATS6e SpMax8_Bh(e) P_VSA_LogP_5 P_VSA_MR_7 SpMaxA_EA(dm) CATS2D_07_PL minaaCH ETA_dBeta）	0.6024	0.514	0.0884	0.9856	0.7686	0.7519	0.3751	0.2273	1.2356	0.9656	68.7048	0.6138	0.1776	-0.3239	0.6557	0.6513	0.6507	0.7004	0.8032	0.5372	0.1555	0.8556	0.7035	7.32
	random	25	44	11	8（MATS6e SpMax8_Bh(e) P_VSA_LogP_5 P_VSA_MR_7 SpMaxA_EA(dm) CATS2D_07_PL minaaCH ETA_dBeta）	0.6161	0.5283	0.0878	1.002	0.7609	0.7624	0.4005	0.2155	1.2521	0.9532	68.9768	0.6326	0.1866	-0.3283	0.7102	0.6526	0.6325	0.8062	0.829	0.6015	0.1599	0.7119	0.6404	5.5756
	remove only one outlier		43	11	8（MATS6e SpMax8_Bh(e) P_VSA_LogP_5 P_VSA_MR_7 SpMaxA_EA(dm) CATS2D_07_PL minaaCH ETA_dBeta）	0.723	0.6578	0.0652	0.8577	0.7032	0.8392	0.5472	0.1758	1.0966	0.8947	51.7113	0.7417	0.19	-0.3407	0.7033	0.5754	0.5545	0.7686	0.821	0.559	0.2383	0.7839	0.6202	6.7595
	Full model		55		8（MATS6e SpMax8_Bh(e) P_VSA_LogP_5 P_VSA_MR_7 SpMaxA_EA(dm) CATS2D_07_PL minaaCH ETA_dBeta）	0.6994	0.6609	0.0385	0.8627	0.6445	0.8231	0.5944	0.105	1.0021	0.7435	89.3779	0.7625
Rat-MousepTD50					MousepTD50	0.729	0.7185	0.0104	0.872	0.7894	0.8432	0.6566	0.0723	0.9814	0.87	26.969	0.7895	0.0365	-0.1311	0.7446	0.7351	0.7119	0.8494	0.8305	0.6467	0.1602	0.65	0.5003	3.802
Mouse-RatpTD50					RatpTD50	0.7298	0.7198	0.01	0.8505	0.709	0.8438	0.6914	0.0383	0.9088	0.7638	23.9519	0.8141	0.0355	-0.1329	0.799	0.7251	0.7171	0.9103	0.8815	0.6877	0.1737	0.4899	0.4687	1.9199

## Sheet: Table S4
Table S4. Selected molecular descriptors for each QSAR model (as per VIP score).
Model	Descriptor name	Range		Type	Subtype	Definition
		Min	Max
Equation (1): Female Rat	nFG12Ring	0	1	PaDEL-2D	Ring Count Descriptor	Number of >12-membered fused rings
	MATS6v	-0.412	0.199	2D autocorrelations	Moran autocorrelations	Moran autocorrelation of lag 6 weighted by van der Waals volume
	MATS5m	-0.338	0.278	2D autocorrelations	Moran autocorrelations	Moran autocorrelation of lag 5 weighted by mass
	nAtomP	6	28	PaDEL-2D	Largest Pi System Descriptor	Number of atoms in the largest pi system
	minsCH3	0	2.223	PaDEL-2D	Electrotopological State Atom Type Descriptor	Minimum atom-type E-State: -CH3
Equation (2): Male rat	SHaaCH	0	6.662	PaDEL-2D	Electrotopological State Atom Type Descriptor	Sum of atom-type H E-State: :CH:
	GATS5s	0.192	2.344	2D autocorrelations	Geary autocorrelations	Geary autocorrelation of lag 5 weighted by I-state
	J_D	1.177	2.187	2D matrix-based descriptors	Topological distance matrix (D)	Balaban-like index from topological distance matrix (Balaban distance connectivity index)
	ATSc4	-0.545	0.259	2D autocorrelations	Centred Broto-Moreau autocorrelations	Centered Broto-Moreau autocorrelation - lag 4/weighted by partial charges
	ATSC3s	7.364	157.572	2D autocorrelations	Centred Broto-Moreau autocorrelations	Centred Broto-Moreau autocorrelation of lag 3 weighted by I-state
	minaaCH	0	2.168	PaDEL-2D	Electrotopological State Atom Type Descriptor	Minimum atom-type E-State: :CH:
Equation (3): Female Mouse	Cl-089	0	4	Atom-centred fragments	Basic descriptors	Cl attached to C1(sp2)
Female Mouse	SpMax2_Bh(v)	3.389	3.881	Burden eigenvalues	Largest eigenvalues	largest eigenvalue n. 2 of Burden matrix weighted by van der Waals volume
	GATS8s	0	4.567	2D autocorrelations	Geary autocorrelations	Geary autocorrelation of lag 8 weighted by I-state
	SpMaxA_B(s)	0.213	0.521	2D matrix-based descriptors	Burden matrix weighted by I-state (B(s))	normalized leading eigenvalue from Burden matrix weighted by I-State
	minaaaC	0	1.31	PaDEL-2D	Electrotopological State Atom Type Descriptor	Minimum atom-type E-State: ::C:
	J_D	1.377	2.187	2D matrix-based descriptors	Topological distance matrix (D)	Balaban-like index from topological distance matrix (Balaban distance connectivity index)
Equation (4): Male Mouse	maxwHBa	1.187	3.993	PaDEL-2D	Electrotopological State Atom Type Descriptor	Maximum E-States for weak Hydrogen Bond acceptors
Male Mouse	P_VSA_MR_7	0	195.743	P_VSA-like descriptors	Molar Refractivity	P_VSA-like on Molar Refractivity, bin 7
	MATS4s	-0.37	0.197	2D autocorrelations	Moran autocorrelations	Moran autocorrelation of lag 4 weighted by I-state
	CIC4	0	2.225	Information indices	Indices of neighborhood symmetry	Complementary Information Content index (neighborhood symmetry of 4-order)
	GATS7e	0	2.29	2D autocorrelations	Geary autocorrelations	Geary autocorrelation of lag 7 weighted by Sanderson electronegativity
	VCH-6	0.031	0.242	PaDEL-2D	Chi Chain Descriptor	Valence chain, order 6
	B10[C-C]	0	1	2D Atom Pairs	Binary Atom Pairs of order 10	Presence/absence of C - C at topological distance 10
Equation (5): Rat	SHaaCH	0	8.659	PaDEL-2D	Electrotopological State Atom Type Descriptor	Sum of atom-type H E-State: :CH:
	MATS5m	-0.338	0.278	2D autocorrelations	Moran autocorrelations	Moran autocorrelation of lag 5 weighted by mass
	J_D	1.177	2.187	2D matrix-based descriptors	Topological distance matrix (D)	Balaban-like index from topological distance matrix (Balaban distance connectivity index)
	SIC1	0.334	0.741	Information indices	Indices of neighborhood symmetry	Structural Information Content index (neighborhood symmetry of 1-order)
	nArOH	0	4	Functional group counts	Basic descriptors	number of aromatic hydroxyls
	SM03_EA(bo)	3.332	5.308	Edge adjacency indices	Spectral moments	spectral moment of order 3 from edge adjacency mat. weighted by bond order
	SpMAD_EA	1.407	1.569	Edge adjacency indices	Spectral indices	spectral mean absolute deviation from edge adjacency mat.
Equation (6): Mouse	P_VSA_MR_7	0	195.743	P_VSA-like descriptors	Molar Refractivity	P_VSA-like on Molar Refractivity, bin 7
	ETA_dBeta	-9.75	10.5	PaDEL-2D	Extended Topochemical Atom Descriptor	A measure of relative unsaturation content
	minaaCH	0	2.346	PaDEL-2D	Electrotopological State Atom Type Descriptor	Minimum atom-type E-State: :CH:
	P_VSA_LogP_5	0	125.309	P_VSA-like descriptors	LogP	P_VSA-like on LogP, bin 5
	MATS6e	-0.487	0.418	2D autocorrelations	Moran autocorrelations	Moran autocorrelation of lag 6 weighted by Sanderson electronegativity
	SpMax8_Bh(e)	1.467	3.309	Burden eigenvalues	Largest eigenvalues	largest eigenvalue n. 8 of Burden matrix weighted by Sanderson electronegativity
	SpMaxA_EA(dm)	0	0.184	Edge adjacency indices	Spectral indices	normalized leading eigenvalue from edge adjacency mat. weighted by dipole moment
	CATS2D_07_PL	0	4	CATS 2D	Basic descriptors	CATS2D Positive-Lipophilic at lag 07

## Sheet: Table S5-S10
Table S5. Prediction quality for the RF QSAR model defined by Equation (1) using MAE-based criteria				Table S6. Prediction quality for the RM QSAR model defined by Equation (2) using MAE-based criteria
User Input File Info.	FileName	RF.xlsx		User Input File Info.	FileName	RM.xlsx
	R^2Test(100% data)	0.9561			R^2Test(100% data)	0.718337
	R0^2Test(100% data)	0.9661			R0^2Test(100% data)	0.718225
	R0^'2Test(100% data)	0.9542			R0^'2Test(100% data)	0.630278
Classical Metrics	Q2F1(100% data)	0.8972		Classical Metrics	Q2F1(100% data)	0.627041
(for 100% data)	Q2F2(100% data)	0.8955		(for 100% data)	Q2F2(100% data)	0.625499
	Scaled Avg.Rm^2(100% data)	0.9334			Scaled Avg.Rm^2(100% data)	0.623076
	Scaled DeltaRm^2(100% data)	0.0384			Scaled DeltaRm^2(100% data)	0.0850775
	CCC(100% data)	0.9547			CCC(100% data)	0.775708
	R^2Test(95% data)	0.9757			R^2Test(95% data)	0.633384
	R0^2Test(95% data)	0.9747			R0^2Test(95% data)	0.623566
Classical Metric	R0^'2Test(95% data)	0.9728		Classical Metric	R0^'2Test(95% data)	0.444686
(after removing	Q2F1(95% data)	0.9424		(after removing	Q2F1(95% data)	0.574587
5% data with	Q2F2(95% data)	0.9417		5% data with	Q2F2(95% data)	0.565359
high residuals)	ScaledAvgRm2(95% data)	0.9345		high residuals)	ScaledAvgRm2(95% data)	0.521961
	ScaledDeltaRm2(95% data)	0.0225			ScaledDeltaRm2(95% data)	0.0327048
	CCC(95% data)	0.9743			CCC(95% data)	0.749722
	RMSEP(100% data)	0.4747			RMSEP(100% data)	0.773556
Error-based metrics	SD(100% data)	0.3233		Error-based metrics	SD(100% data)	0.318061
(for 100% data)	SE(100% data)	0.1143		(for 100% data)	SE(100% data)	0.10058
	MAE(100% data)	0.3659			MAE(100% data)	0.71228
	RMSEP(95% data)	0.3788			RMSEP(95% data)	0.719178
Error-based metric	SD(95% data)	0.2625		Error-based metric	SD(95% data)	0.294713
(after removing 5% data	SE(95% data)	0.0992		(after removing 5% data	SE(95% data)	0.0982377
with high residuals)	MAE(95% data)	0.2906		with high residuals)	MAE(95% data)	0.663333
	MAE+3*SD(95% data)	1.0781			MAE+3*SD(95% data)	1.54747
BASIC DATA STRUCTURE INFORMATION				BASIC DATA STRUCTURE INFORMATION
	NCompTest	8			NCompTest	10
Number of test set compounds,	Train range	8.8027		Number of test set compounds,	Train range	9.3548
Range and Mean (train and test)	TrainYMean	3.2123		Range and Mean (train and test)	TrainYMean	3.2812
	Test range	3.9254			Test range	4.232
	TestYMean	2.9336			TestYMean	3.36248
Distribution of observed	%Y(+/-0.5)TestMean	12.5		Distribution of observed	%Y(+/-0.5)TestMean	20
response values of Test set	%Y(+/-1.0)TestMean	37.5		response values of Test set	%Y(+/-1.0)TestMean	50
around Test mean(in %)	%Y(+/-1.5)TestMean	62.5		around Test mean(in %)	%Y(+/-1.5)TestMean	70
	%Y(+/-2.0)TestMean	75			%Y(+/-2.0)TestMean	80
Distribution of observed	%Y(+/-0.5)TrainMean	25		Distribution of observed	%Y(+/-0.5)TrainMean	30
response values of Test set	%Y(+/-1.0)TrainMean	25		response values of Test set	%Y(+/-1.0)TrainMean	50
around Train mean (in %)	%Y(+/-1.5)TrainMean	62.5		around Train mean (in %)	%Y(+/-1.5)TrainMean	80
	%Y(+/-2.0)TrainMean	100			%Y(+/-2.0)TrainMean	90
	%NComp>(0.1*TR)	10			%NComp>(0.1*TR)	30
Distribution of prediction	%NComp>(0.15*TR)	0		Distribution of prediction	%NComp>(0.15*TR)	0
errors (in %)	%NComp>(0.2*TR)	0		errors (in %)	%NComp>(0.2*TR)	0
	%NComp>(0.25*TR)	0			%NComp>(0.25*TR)	0
	(0.1*TrainingSetRange)	0.8803			(0.1*TrainingSetRange)	0.93548
Threshold values utilized	(0.15*TrainingSetRange)	1.3204		Threshold values utilized	(0.15*TrainingSetRange)	1.40322
to judge the model predictions	(0.2*TrainingSetRange)	1.7605		to judge the model predictions	(0.2*TrainingSetRange)	1.87096
	(0.25*TrainingSetRange)	2.2007			(0.25*TrainingSetRange)	2.3387
RESULT (MAE-based criteria applied on 95% data)	Prediction Quality	GOOD		RESULT (MAE-based criteria applied on 95% data)	Prediction Quality	GOOD
Table S7. Prediction quality for the MF QSAR model defined by Equation (3) using MAE-based criteria				Table S8. Prediction quality for the MM QSAR model defined by Equation (4) using MAE-based criteria
User Input File Info.	FileName	MF.xlsx		User Input File Info.	FileName	MM.xlsx
	R^2Test(100% data)	0.826407			R^2Test(100% data)	0.880158
	R0^2Test(100% data)	0.808296			R0^2Test(100% data)	0.78926
	R0^'2Test(100% data)	0.698473			R0^'2Test(100% data)	0.861046
Classical Metrics	Q2F1(100% data)	0.812619		Classical Metrics	Q2F1(100% data)	0.786033
(for 100% data)	Q2F2(100% data)	0.808229		(for 100% data)	Q2F2(100% data)	0.78602
	Scaled Avg.Rm^2(100% data)	0.626638			Scaled Avg.Rm^2(100% data)	0.676818
	Scaled DeltaRm^2(100% data)	0.178121			Scaled DeltaRm^2(100% data)	0.128976
	CCC(100% data)	0.880878			CCC(100% data)	0.913342
	R^2Test(95% data)	0.92088			R^2Test(95% data)	0.916956
	R0^2Test(95% data)	0.880619			R0^2Test(95% data)	0.843963
Classical Metric	R0^'2Test(95% data)	0.607123		Classical Metric	R0^'2Test(95% data)	0.780618
(after removing	Q2F1(95% data)	0.881813		(after removing	Q2F1(95% data)	0.844269
5% data with	Q2F2(95% data)	0.87601		5% data with	Q2F2(95% data)	0.843777
high residuals)	ScaledAvgRm2(95% data)	0.66996		high residuals)	ScaledAvgRm2(95% data)	0.732363
	ScaledDeltaRm2(95% data)	0.126175			ScaledDeltaRm2(95% data)	0.0934256
	CCC(95% data)	0.924974			CCC(95% data)	0.93708
	RMSEP(100% data)	0.588264			RMSEP(100% data)	0.400205
Error-based metrics	SD(100% data)	0.320104		Error-based metrics	SD(100% data)	0.20691
(for 100% data)	SE(100% data)	0.101226		(for 100% data)	SE(100% data)	0.0654308
	MAE(100% data)	0.50382			MAE(100% data)	0.34876
	RMSEP(95% data)	0.485954			RMSEP(95% data)	0.356229
Error-based metric	SD(95% data)	0.237256		Error-based metric	SD(95% data)	0.181981
(after removing 5% data	SE(95% data)	0.0790854		(after removing 5% data	SE(95% data)	0.0606603
with high residuals)	MAE(95% data)	0.431411		with high residuals)	MAE(95% data)	0.312189
	MAE+3*SD(95% data)	1.14318			MAE+3*SD(95% data)	0.858132
BASIC DATA STRUCTURE INFORMATION				BASIC DATA STRUCTURE INFORMATION
	NCompTest	10			NCompTest	10
Number of test set compounds,	Train range	9.223		Number of test set compounds,	Train range	9.223
Range and Mean (train and test)	TrainYMean	2.9925		Range and Mean (train and test)	TrainYMean	2.9956
	Test range	4.2679			Test range	3.1107
	TestYMean	2.78689			TestYMean	2.98894
Distribution of observed	%Y(+/-0.5)TestMean	20		Distribution of observed	%Y(+/-0.5)TestMean	40
response values of Test set	%Y(+/-1.0)TestMean	40		response values of Test set	%Y(+/-1.0)TestMean	70
around Test mean(in %)	%Y(+/-1.5)TestMean	70		around Test mean(in %)	%Y(+/-1.5)TestMean	90
	%Y(+/-2.0)TestMean	90			%Y(+/-2.0)TestMean	100
Distribution of observed	%Y(+/-0.5)TrainMean	20		Distribution of observed	%Y(+/-0.5)TrainMean	40
response values of Test set	%Y(+/-1.0)TrainMean	50		response values of Test set	%Y(+/-1.0)TrainMean	70
around Train mean (in %)	%Y(+/-1.5)TrainMean	70		around Train mean (in %)	%Y(+/-1.5)TrainMean	90
	%Y(+/-2.0)TrainMean	90			%Y(+/-2.0)TrainMean	100
	%NComp>(0.1*TR)	10			%NComp>(0.1*TR)	0
Distribution of prediction	%NComp>(0.15*TR)	0		Distribution of prediction	%NComp>(0.15*TR)	0
errors (in %)	%NComp>(0.2*TR)	0		errors (in %)	%NComp>(0.2*TR)	0
	%NComp>(0.25*TR)	0			%NComp>(0.25*TR)	0
	(0.1*TrainingSetRange)	0.9223			(0.1*TrainingSetRange)	0.9223
Threshold values utilized	(0.15*TrainingSetRange)	1.38345		Threshold values utilized	(0.15*TrainingSetRange)	1.38345
to judge the model predictions	(0.2*TrainingSetRange)	1.8446		to judge the model predictions	(0.2*TrainingSetRange)	1.8446
	(0.25*TrainingSetRange)	2.30575			(0.25*TrainingSetRange)	2.30575
RESULT (MAE-based criteria applied on 95% data)	Prediction Quality	GOOD		RESULT (MAE-based criteria applied on 95% data)	Prediction Quality	GOOD
Table S9. Prediction quality for the Rat QSAR model defined by Equation (5) using MAE-based criteria				Table S10. Prediction quality for the Mouse QSAR model defined by Equation (6) using MAE-based criteria
User Input File Info.	FileName	r.xlsx		User Input File Info.	FileName	M.xlsx
	R^2Test(100% data)	0.792063			R^2Test(100% data)	0.710171
	R0^2Test(100% data)	0.781217			R0^2Test(100% data)	0.639666
	R0^'2Test(100% data)	0.782529			R0^'2Test(100% data)	0.70854
Classical Metrics	Q2F1(100% data)	0.784296		Classical Metrics	Q2F1(100% data)	0.652565
(for 100% data)	Q2F2(100% data)	0.780873		(for 100% data)	Q2F2(100% data)	0.63253
	Scaled Avg.Rm^2(100% data)	0.718118			Scaled Avg.Rm^2(100% data)	0.60979
	Scaled DeltaRm^2(100% data)	0.0196299			Scaled DeltaRm^2(100% data)	0.193194
	CCC(100% data)	0.8882			CCC(100% data)	0.829025
	R^2Test(95% data)	0.845409			R^2Test(95% data)	0.728079
	R0^2Test(95% data)	0.845302			R0^2Test(95% data)	0.702757
Classical Metric	R0^'2Test(95% data)	0.726052		Classical Metric	R0^'2Test(95% data)	0.642975
(after removing	Q2F1(95% data)	0.847255		(after removing	Q2F1(95% data)	0.723734
5% data with	Q2F2(95% data)	0.844704		5% data with	Q2F2(95% data)	0.700494
high residuals)	ScaledAvgRm2(95% data)	0.786158		high residuals)	ScaledAvgRm2(95% data)	0.635523
	ScaledDeltaRm2(95% data)	0.107001			ScaledDeltaRm2(95% data)	0.0554448
	CCC(95% data)	0.917445			CCC(95% data)	0.848901
	RMSEP(100% data)	0.638223			RMSEP(100% data)	0.711941
Error-based metrics	SD(100% data)	0.425062		Error-based metrics	SD(100% data)	0.326323
(for 100% data)	SE(100% data)	0.128161		(for 100% data)	SE(100% data)	0.0983901
	MAE(100% data)	0.493027			MAE(100% data)	0.640355
	RMSEP(95% data)	0.563255			RMSEP(95% data)	0.662372
Error-based metric	SD(95% data)	0.386015		Error-based metric	SD(95% data)	0.305953
(after removing 5% data	SE(95% data)	0.122069		(after removing 5% data	SE(95% data)	0.096751
with high residuals)	MAE(95% data)	0.42796		with high residuals)	MAE(95% data)	0.59539
	MAE+3*SD(95% data)	1.586			MAE+3*SD(95% data)	1.51325
BASIC DATA STRUCTURE INFORMATION				BASIC DATA STRUCTURE INFORMATION
	NCompTest	11			NCompTest	11
Number of test set compounds,	Train range	9.599		Number of test set compounds,	Train range	9.223
Range and Mean (train and test)	TrainYMean	2.9677		Range and Mean (train and test)	TrainYMean	2.9956
	Test range	4.3969			Test range	3.9903
	TestYMean	3.13946			TestYMean	3.27763
Distribution of observed	%Y(+/-0.5)TestMean	27.2727		Distribution of observed	%Y(+/-0.5)TestMean	27.2727
response values of Test set	%Y(+/-1.0)TestMean	45.4545		response values of Test set	%Y(+/-1.0)TestMean	63.6364
around Test mean(in %)	%Y(+/-1.5)TestMean	54.5455		around Test mean(in %)	%Y(+/-1.5)TestMean	72.7273
	%Y(+/-2.0)TestMean	81.8182			%Y(+/-2.0)TestMean	90.9091
Distribution of observed	%Y(+/-0.5)TrainMean	36.3636		Distribution of observed	%Y(+/-0.5)TrainMean	27.2727
response values of Test set	%Y(+/-1.0)TrainMean	45.4545		response values of Test set	%Y(+/-1.0)TrainMean	54.5455
around Train mean (in %)	%Y(+/-1.5)TrainMean	54.5455		around Train mean (in %)	%Y(+/-1.5)TrainMean	72.7273
	%Y(+/-2.0)TrainMean	81.8182			%Y(+/-2.0)TrainMean	90.9091
	%NComp>(0.1*TR)	18.1818			%NComp>(0.1*TR)	27.2727
Distribution of prediction	%NComp>(0.15*TR)	0		Distribution of prediction	%NComp>(0.15*TR)	0
errors (in %)	%NComp>(0.2*TR)	0		errors (in %)	%NComp>(0.2*TR)	0
	%NComp>(0.25*TR)	0			%NComp>(0.25*TR)	0
	(0.1*TrainingSetRange)	0.9599			(0.1*TrainingSetRange)	0.9223
Threshold values utilized	(0.15*TrainingSetRange)	1.43985		Threshold values utilized	(0.15*TrainingSetRange)	1.38345
to judge the model predictions	(0.2*TrainingSetRange)	1.9198		to judge the model predictions	(0.2*TrainingSetRange)	1.8446
	(0.25*TrainingSetRange)	2.39975			(0.25*TrainingSetRange)	2.30575
RESULT (MAE-based criteria applied on 95% data)	Prediction Quality	GOOD		RESULT (MAE-based criteria applied on 95% data)	Prediction Quality	GOOD

## Sheet: Table S11
Table S11. Experimental and predicted pTD50 values, hat values, standardized residuals, descriptor values of all training, test, and unknown external compounds of the female rat QSAR model defined by Equation (1).
Modeling data set
No.	CAS	Status	Experimental pTD50	Predicted pTD50	Mw	ALogP	HAT i/i (h*=0.7200)	Std.residuals	MATS5m	MATS6v	minsCH3	nAtomP	nFG12Ring		The range of the descriptors' values
2	53-96-3	test	5.1641	5.5004	223.275	-0.1687	0.5148	0.5625	-0.167	0.075	1.52974	15	1	RF model
3	81-49-2	Training	3.9778	4.3227	381.023	0.5001	0.2815	0.474	0.026	-0.349	0	17	1		Descriptor	Minimum	Maximum
4	82-28-0	Training	3.3145	3.0537	237.258	-0.6355	0.3459	-0.3757	-0.026	-0.309	1.82726	17	1		MATS5m	-0.338	0.278
6	97-56-3	Training	4.7845	4.1249	225.295	0.5341	0.2014	-0.86	0.178	0.145	1.96044	15	0		MATS6v	-0.412	0.199
9	103-33-3	Training	2.8197	2.2484	182.226	0	0.1261	-0.712	0.022	-0.204	0	14	0		minsCH3	0	2.22291
13	80-05-7	Training	2.5840	3.7758	228.291	-0.0064	0.1893	1.5421	0.06	0.101	2.11683	7	0		nAtomP	6	28
15	85-68-7	Training	1.7449	1.6574	312.365	-0.6837	0.1722	-0.1121	0.023	-0.114	2.0166	12	0		nFG12Ring	0	1
16	101-79-1	Training	3.7631	3.8949	219.668	-0.1597	0.2254	0.1744	0.226	-0.123	0	14	0
23	1163-19-5	Training	2.1637	2.3691	959.171	8.7339	0.0995	0.2522	-0.029	-0.163	0	13	0
24	262-12-4	Training	1.5353	2.2379	184.194	-0.3082	0.389	1.0473	-0.338	-0.412	0	14	1
28	91-93-0	test	1.2387	1.1954	296.282	-1.3732	0.2345	-0.0577	-0.004	-0.114	1.49148	20	0
29	57-41-0	Training	2.0838	1.4455	252.273	-0.5759	0.3607	-0.93	-0.247	-0.218	0	6	0
30	72-56-0	Training	1.5560	2.6492	307.258	1.7791	0.2103	1.4332	-0.001	-0.012	2.22291	6	0
32	122-66-7	Training	4.0077	4.5606	184.242	-0.8408	0.1266	0.6893	0.127	0.039	0	14	0
33	53-95-2	test	5.1383	5.9776	239.274	-0.629	0.3888	1.2508	-0.051	0.051	1.33529	16	1
37	101-14-4	Training	4.2281	3.3164	267.153	0.445	0.2595	-1.2344	-0.122	-0.038	0	7	0
38	101-61-1	Training	3.0980	3.8216	254.377	0.8918	0.1946	0.9394	0.028	0.125	2.06446	7	0
39	90-94-8	Training	4.7412	3.2001	268.36	0.1718	0.235	-2.0527	-0.02	0.173	1.98294	16	0
40	3771-19-5	Training	3.9284	2.4725	310.393	0.0993	0.1454	-1.8349	-0.025	-0.072	1.55618	7	0
42	2243-62-1	test	2.8263	3.7199	158.203	-1.4998	0.4005	1.3445	-0.181	0.119	0	12	0
46	156-10-5	Training	2.2144	2.7485	198.225	-0.4437	0.1082	0.659	0.058	-0.149	0	15	0
49	101-80-4	Training	3.9984	3.8140	200.241	-1.6539	0.2853	-0.2541	0.258	-0.145	0	15	0
52	842-07-9	Training	3.4579	3.1114	248.285	-0.4603	0.1911	-0.4489	-0.041	0.019	0	19	0
54	117-39-5	Training	0.6013	1.5427	302.238	-2.8012	0.3203	1.3305	-0.163	-0.074	0	22	0
57	599-79-1	test	1.6678	1.7573	398.393	-1.6366	0.5503	0.1554	-0.055	-0.05	0	28	0
59	1746-01-6	Training	9.4040	9.4248	321.962	2.669	0.7557	0.0491	0.191	0.199	0	14	1
60	96-69-5	test	1.9536	2.1849	358.543	4.0664	0.181	0.2979	-0.07	-0.027	2.0968	7	0
61	139-65-1	test	3.7118	3.4391	216.302	-0.9092	0.6796	-0.5613	0.278	-0.306	0	7	0
63	2832-40-8	Training	0.7600	1.3582	269.304	0.11	0.1685	0.7643	-0.088	-0.054	1.50807	18	0
64	6358-85-6	Training	0.9423	1.8193	629.498	0.5034	0.1439	1.1044	-0.126	-0.004	1.33676	16	0
66	50594-66-6	Training	3.4579	3.0049	361.657	2.1086	0.1401	-0.5692	0.062	-0.069	0	19	0
67	129-15-7	Training	2.9164	2.1089	267.24	0.7745	0.3246	-1.1447	-0.218	-0.305	1.55226	19	1
69	2425-85-6	test	1.7682	1.9899	307.309	0.8418	0.3287	0.3151	-0.007	0.048	1.76831	22	0
Unknown external set (142)
No.	CAS	Name		Predicted pTD50	MW	ALOGP	HAT i/i (h*=0.7200)		MATS5m	MATS6v	minsCH3	nAtomP	nFG12Ring
1	26148-68-5	1,9-dihydro-2H-pyrido[2,3-b]indol-2-imine		6.482	183.23	-0.5359	0.5452		-0.134	0.026	0	14	1
5	117-79-3	2-aminoanthracene-9,10-dione		3.1337	223.24	-1.2775	0.255		-0.188	-0.36	0	17	1
7	92-67-1	[1,1'-biphenyl]-4-amine		3.3902	169.24	-0.7499	0.1019		0.081	-0.101	0	13	0
8	3693-22-9	dibenzo[b,d]furan-2-amine		4.0897	183.22	-0.904	0.2493		-0.1	-0.327	0	14	1
10	119-53-9	2-hydroxy-1,2-diphenylethan-1-one		3.5301	212.26	-0.8812	0.1849		-0.05	-0.048	0	8	0
11	120-32-1	2-benzyl-4-chlorophenol		4.589	218.69	0.7402	0.2314		0.125	-0.039	0	7	0
12	79520-77-7	5,5'-([1,1'-biphenyl]-2,5-diylbis(oxy))bis(2,2-dimethylpentanoic acid)		3.5933	442.6	0.6126	0.1191		0.087	0.101	1.71484	14	0
14	2475-45-8	1,4,5,8-tetraaminoanthracene-9,10-dione		2.631	268.3	-3.5272	0.297		-0.145	-0.424	0	20	1
17	510-15-6	ethyl 2,2-bis(4-chlorophenyl)-2-hydroxyacetate		1.8591	325.2	1.005	0.1982		-0.089	-0.105	1.73789	6	0
18	10473-70-8	1-(4-chlorophenyl)-1-phenylprop-2-yn-1-yl hydrogen carbonimidate		2.0719	285.74	1.6935	0.2909		-0.084	-0.248	0	6	0
19	117-10-2	1,8-dihydroxyanthracene-9,10-dione		3.4415	240.22	-1.4482	0.3675		-0.286	-0.236	0	18	1
20	87-29-6	cinnamyl 2-aminobenzoate		3.0602	253.32	-0.3616	0.2434		-0.162	-0.009	0	10	0
21	72-55-9	4,4'-(2,2-dichloroethene-1,1-diyl)bis(chlorobenzene)		0.8131	318.02	2.7413	0.2406		-0.262	-0.199	0	14	0
22	50-29-3	4,4'-(2,2,2-trichloroethane-1,1-diyl)bis(chlorobenzene)		0.9019	354.48	3.1425	0.3876		-0.248	-0.292	0	6	0
25	33857-26-0	2,7-dichlorodibenzo[b,e][1,4]dioxine		6.9394	253.08	1.1804	0.353		0.134	-0.102	0	14	1
26	115-32-2	2,2,2-trichloro-1,1-bis(4-chlorophenyl)ethan-1-ol		2.2136	370.48	2.4316	0.3699		-0.242	-0.116	0	6	0
27	5803-51-0	(E)-4-(2,5-dimethoxystyryl)aniline		2.76	255.34	-0.3857	0.1476		0.088	0.015	1.64809	17	0
31	324-93-6	4'-fluoro-[1,1'-biphenyl]-4-amine		4.4811	187.23	-0.2702	0.1476		0.182	-0.023	0	13	0
34	129-43-1	1-hydroxyanthracene-9,10-dione		2.7658	224.22	-0.9879	0.3694		-0.325	-0.313	0	17	1
35	6471-49-4	(E)-3-hydroxy-4-((2-methoxy-5-nitrophenyl)diazenyl)-N-(3-nitrophenyl)-2-naphthamide		1.3659	487.46	0.1733	1.2769		-0.028	0.093	1.367	35	0
36	21340-68-1	methyl 2-((4'-chloro-[1,1'-biphenyl]-4-yl)oxy)-2-methylpropanoate		3.7583	304.79	1.1955	0.3829		-0.136	0.236	1.35843	13	0
41	91-20-3	naphthalene		6.4186	128.18	0	0.6916		-0.018	0.35	0	10	0
43	91-59-8	naphthalen-2-amine		3.6167	143.2	-0.7499	0.1164		-0.007	-0.031	0	11	0
44	81-16-3	2-aminonaphthalene-1-sulfonic acid		1.7327	223.27	-1.2914	0.4648		-0.329	-0.013	0	15	0
45	86-30-6	N,N-diphenylnitrous amide		0.895	198.24	-0.1138	0.1863		-0.2	-0.22	0	15	0
47	303-47-9	(S)-2-(((Z)-((R)-5-chloro-8-hydroxy-3-methyl-1-oxoisochroman-7-yl)(hydroxy)methylene)amino)-3-phenylpropanoic acid		2.081	403.84	-0.1599	0.2277		0.122	-0.138	1.77334	13	0
48	604-75-1	7-chloro-5-phenyl-3H-benzo[e][1,4]diazepine-2,3-diol		2.4821	286.73	0.2344	0.1147		0.033	-0.144	0	17	0
50	77-09-8	3,3-bis(4-hydroxyphenyl)isobenzofuran-1(3H)-one		1.7312	318.34	-1.2966	0.2032		-0.101	-0.247	0	9	0
51	135-88-6	2-benzylnaphthalene		4.1488	218.31	0.4562	0.1428		0.027	0.006	0	10	0
53	50-33-9	4-butyl-1,2-diphenylpyrazolidine-3,5-dione		0.0945	308.41	-1.6834	0.3301		-0.054	-0.198	2.06333	18	0
55	50-55-5	methyl (1S,2R,3R,4aS,13bR,14aS)-2,11-dimethoxy-3-((3,4,5-trimethoxybenzoyl)oxy)-1,2,3,4,4a,5,7,8,13,13b,14,14a-dodecahydroindolo[2',3':3,4]pyrido[1,2-b]isoquinoline-1-carboxylate		22.1806	608.75	-0.8642	11.8094		-0.046	-0.082	1.39734	12	6
56	83-79-4	(2R,6aS,12aS)-8,9-dimethoxy-2-(prop-1-en-2-yl)-1,2,12,12a-tetrahydrochromeno[3,4-b]furo[2,3-h]chromen-6(6aH)-one		21.9358	394.45	0.1527	11.6702		-0.016	-0.144	1.57065	10	6
58	10048-13-2	(3aR,12cS)-8-hydroxy-6-methoxy-3a,12c-dihydro-7H-furo[3',2':4,5]furo[2,3-c]xanthen-7-one		17.2184	324.3	-1.4653	7.3848		-0.101	-0.183	1.47405	18	5
62	76-87-9	triphenylstannanol		3.1279	367.05	-0.4603	0.2472		-0.081	-0.105	0	6	0
65	128-66-5	dibenzo[c,pqr]tetraphene-7,14-dione		61.0857	332.36	-0.5276	108.32		-0.229	-0.129	0	26	18
68	602-87-9	5-nitro-1,2-dihydroacenaphthylene		6.0855	199.22	0.7849	1.0012		-0.122	0.414	0	13	0
108	4075-79-0	4-acetylaminobiphenyl		1.6506	211.28	-0.6249	0.1173		-0.106	-0.037	1.50507	15	0
109	28314-03-6	1-Acetylaminofluorene		4.5951	223.29	-0.1687	0.2417		-0.038	-0.14	1.54314	15	1
110	28322-02-3	4-Acetylaminofluorene		4.281	223.29	-0.1687	0.3176		-0.176	-0.085	1.54191	15	1
111	3693-22-9	2-Dibenzofuranamine		4.0897	183.22	-0.904	0.2493		-0.1	-0.327	0	14	1
112	84-65-1	9,10-Anthracenedione		2.3242	208.22	-0.5276	0.4343		-0.382	-0.345	0	16	1
113	68844-77-9	Astemizole		3.3884	458.63	-0.2905	0.1574		0.147	-0.019	1.69944	10	0
114	64896-26-0	Benzalazine		4.0889	208.28	-0.0684	0.122		0.134	-0.007	0	16	0
115	92-87-5	Benzidine		3.8967	184.26	-1.4998	0.15		0.173	-0.085	0	14	0
116	50-32-8	Benzo(a)pyrene		31.6244	252.32	0	26.5424		-0.17	-0.125	0	20	9
117	120-78-5	Dibenzothiazyl disulfide		0.6801	332.52	2.3624	0.2914		-0.221	-0.306	0	9	0
118	92-52-4	Biphenyl		2.7273	154.22	0	0.1007		-0.051	-0.11	0	12	0
119	145040-37-5	Candesartan cilexetil		0.9638	610.73	-0.8455	0.1581		-0.105	-0.11	1.48758	17	0
120	63-25-2	Carbaryl		0.9432	201.24	0.2352	0.1548		-0.046	-0.192	1.47268	14	0
121	86-74-8	Carbazole		5.5088	167.22	-0.4204	0.3985		-0.163	-0.099	0	13	1
122	80-33-1	Chlorfenson		2.3482	303.17	1.0958	0.1244		0.041	-0.18	0	16	0
123	2227-13-6	Sulfide, p-chlorophenyl 2,4,5-trichlorophenyl		6.169	324.05	3.5678	0.8418		0.482	-0.088	0	6	0
124	94-20-2	Chlorpropamide		2.2341	276.77	-0.5337	0.1567		0.079	-0.074	1.90032	13	0
125	22494-47-9	Clobuzarit		2.5938	304.79	0.9561	0.2856		0.19	-0.149	1.55546	12	0
126	477-30-5	Demecolcine		3.0312	371.47	-0.6064	0.2745		-0.179	-0.223	1.49992	18	1
127	65765-07-3	3-Hydroxyproquazone		-1.2747	294.38	-0.6343	0.4251		-0.262	-0.247	1.9711	18	0
128	80-08-0	Dapsone		1.7887	248.33	-1.925	0.2909		0.107	-0.292	0	17	0
129	53-19-0	Mitotane		3.2436	320.04	2.6539	0.2626		0.034	-0.171	0	6	0
130	52918-63-5	Deltamethrin		-0.3564	505.22	1.9373	0.4462		-0.039	-0.326	2.10626	13	0
131	131-01-1	Deserpidine		22.0109	578.72	-0.8124	11.7514		-0.061	-0.094	1.4039	12	6
132	63019-65-8	N-1-Diacetamidofluorene		4.3595	265.33	-0.2823	0.4709		-0.241	-0.016	1.41953	17	1
133	538-41-0	4,4'-Diaminoazobenzene		4.0731	212.28	-1.4998	0.4627		0.35	-0.163	0	16	0
134	785-30-8	4,4'-Diaminobenzanilide		3.5694	227.29	-2.1346	0.2581		0.233	-0.137	0	17	0
135	439-14-5	Diazepam		2.5725	284.76	-0.0956	0.1568		0.047	0.035	1.81886	17	0
136	53-70-3	Dibenz(a,h)anthracene		22.9809	278.36	0	11.9737		-0.03	0	0	22	6
137	4106-66-5	3-Aminodibenzofuran		3.6793	183.22	-0.904	0.3172		-0.248	-0.278	0	14	1
138	117-80-6	2,3-Dichlor-1,4-naphthochinon		-2.2273	227.04	0.6776	0.7628		-0.284	-0.625	0	12	0
139	91-94-1	3,3'-Dichlorobenzidine		3.3399	253.14	-0.0112	0.1678		0.154	-0.148	0	14	0
140	97-16-5	2,4-Dichlorophenyl benzenesulfonate		2.2506	303.17	1.0958	0.1977		-0.166	-0.046	0	16	0
141	56-53-1	Diethylstilbestrol		0.5735	268.38	-0.2302	0.2321		-0.145	-0.084	2.13717	16	0
142	21626-89-1	Diftalone		13.2585	264.3	-1.2464	3.038		-0.03	0.005	0	18	3
143	65176-75-2	5,6-Dimethoxysterigmatocystin		16.7812	384.36	-1.5689	7.2346		-0.124	-0.207	1.43177	20	5
144	60-11-7	4-(Dimethylamino)azobenzene		3.3212	225.32	0.2178	0.1606		0.078	0.111	2.01438	15	0
145	57-97-6	7,12-Dimethylbenz(a)anthracene		9.7052	256.36	1.284	2.654		-0.244	-0.114	2.235	18	3
146	74-31-7	p-Phenylenediamine, N,N'-diphenyl-		2.385	260.36	-0.8408	0.1817		0.063	-0.143	0	20	0
147	86-29-3	Diphenylacetonitrile		2.8633	193.26	-0.11	0.2488		-0.038	-0.172	0	6	0
148	102-09-0	Diphenyl carbonate		2.6263	214.23	0.4597	0.1803		-0.13	-0.02	0	16	0
149	40762-15-0	Doxefazepam		2.7232	348.78	-0.2762	0.1103		-0.03	-0.066	0	17	0
150	476-66-4	Ellagic acid		10.849	302.2	-2.0234	2.4492		0.222	-0.458	0	22	3
151	29975-16-4	Estazolam		6.8988	294.76	0.4393	0.4422		0.023	0.031	0	19	1
152	22966-79-6	Estradiol mustard		13.1731	788.74	3.4345	3.2707		0.039	0.07	2.40052	9	3
153	842-00-2	4-Ethylsulfonylnaphthalene-1-sulfonamide		0.7015	299.4	-1.009	0.1822		-0.099	-0.138	1.61448	17	0
154	51630-58-1	Fenvalerate		1.2421	419.93	0.8049	0.1689		-0.153	-0.037	1.98392	13	0
155	363-17-7	Acetamide, N-fluoren-2-yl-2,2,2-trifluoro-		8.1827	277.26	0.9195	0.5546		0.1	0.105	0	15	1
156	398-32-3	4'-Fluoro-4-biphenylacetamide		4.1504	229.27	-0.1203	0.1372		0.013	0.04	0	12	0
157	93957-54-1	Fluvastatin		-0.0827	411.51	-0.5015	0.3048		-0.219	-0.117	2.06078	17	0
158	517-28-2	Hematoxylin		13.1729	302.3	-2.4092	3.3831		-0.145	-0.032	0	9	3
159	70-30-4	Hexachlorophene		5.6539	406.89	4.0014	0.6992		-0.109	0.274	0	7	0
160	103-16-2	Monobenzone		5.8142	200.25	-0.6028	0.3064		0.256	0.048	0	8	0
161	4463-22-3	N-Hydroxy-4-acetylaminobiphenyl		2.2777	227.28	-1.0852	0.117		-0.072	0.018	1.31062	16	0
162	4363-03-5	3-Hydroxy-4-aminobiphenyl		3.4926	185.24	-1.2102	0.1635		0.161	-0.132	0	14	0
163	53-86-1	Indomethacin		1.4282	357.81	0.2922	0.2326		0.063	-0.147	1.55877	18	0
164	101-73-5	4-Isopropoxydiphenylamine		0.92	227.33	-0.5223	0.173		-0.127	-0.084	2.02394	14	0
165	520-18-3	Kaempferol		0.8393	286.25	-2.3409	0.3303		-0.227	-0.137	0	21	0
166	22071-15-4	Ketoprofen		1.7531	254.3	-0.2088	0.1052		-0.012	-0.092	1.6056	14	0
167	50264-69-2	Lonidamine		4.0596	321.17	1.2736	0.1175		0.032	0.014	0	12	0
168	67-98-1	Ethamoxytriphetol		4.4932	419.61	0.1119	0.1851		0.089	0.134	1.65374	7	0
169	80830-39-3	3-Methoxy-4-aminoazobenzene		2.8489	227.29	-0.8017	0.1253		0.001	0.07	1.57323	16	0
170	3544-23-8	2-Methoxy-4-aminoazobenzene		0.8863	227.29	-0.8017	0.1537		-0.089	-0.135	1.57967	16	0
171	5834-17-3	2-Methoxy-3-dibenzofuranamine		5.1994	213.25	-0.9558	0.3971		-0.134	0.018	1.61091	15	1
172	72-43-5	Methoxychlor		2.1131	345.66	1.5503	0.1719		-0.12	-0.038	1.7184	7	0
173	55-80-1	3-Methyl-4'-(dimethylamino)azobenzene		3.4772	239.35	0.8598	0.2107		0.013	0.179	2.01713	15	0
174	11013-97-1	Methyl hesperidin		2.5525	624.65	-4.4515	0.0984		-0.08	0.017	1.46568	11	0
175	16699-10-8	4-(4-N-Methyl-N-nitrosaminostyryl)quinoline		2.9159	289.36	0.4563	0.3178		0.005	0.141	1.62594	21	0
176	56-49-5	3-Methylcholanthrene		25.5832	268.37	0.7668	17.0576		-0.148	0.149	2.24451	18	7
177	838-88-0	4,4'-Methylene bis(2-methylaniline)		4.6934	226.35	0.2404	0.2299		0.122	0.175	2.03479	7	0
178	119-47-1	p-Cresol, 2,2'-methylenebis(6-tert- butyl-		-0.684	340.55	3.932	0.4275		-0.234	-0.309	2.05046	7	0
179	90-12-0	1-Methylnaphthalene		3.7525	142.21	0.642	0.7051		-0.221	0.336	2.1412	10	0
180	5800-19-1	Metiapine		3.6776	323.5	0.9179	0.5018		0.095	-0.298	2.19025	15	1
181	86-86-2	2-(1-Naphthyl)acetamide		3.4428	185.24	-0.6	0.1913		-0.098	-0.002	0	10	0
182	86-87-3	alpha-Naphthylacetic acid		4.3214	186.22	-0.205	0.2291		-0.045	0.081	0	10	0
183	93-46-9	p-Phenylenediamine, N,N'-(di-2-naphthyl)-		2.7204	360.48	-0.8408	0.5427		0.041	0.014	0	28	0
184	86-88-4	1-(1-Naphthyl)-2-thiourea		3.4561	202.3	0.2714	0.1223		-0.037	0.004	0	14	0
185	51715-17-4	N-Nitrosochlordiazepoxide		1.3906	328.78	0.3019	0.2527		0.044	-0.121	1.49523	20	0
186	27753-52-2	Nonabromobiphenyl		1.7466	864.23	7.9992	0.1506		-0.156	-0.17	0	12	0
187	94-36-0	Benzoyl peroxide		3.1223	242.24	-0.1822	0.2716		-0.116	0.062	0	18	0
188	3096-50-2	2-Acetylaminofluoren-9-one		4.3082	237.27	-0.8887	0.4957		-0.254	-0.011	1.44821	17	1
189	92-84-2	Phenothiazine		4.4884	199.29	0.1702	0.3058		-0.183	-0.225	0	13	1
190	71835-85-3	Phenylethyl 3-methylcaffeate		3.4694	298.36	0.0251	0.0952		0.026	0.092	1.47261	13	0
191	90-43-7	2-Phenylphenol		2.241	170.22	-0.4603	0.1518		-0.152	-0.093	0	13	0
192	92-69-3	4-Hydroxybiphenyl		3.6304	170.22	-0.4603	0.0942		0.074	-0.063	0	13	0
193	2955-38-6	Prazepam		2.5264	324.83	0.0188	0.1035		-0.009	-0.108	0	17	0
194	54-80-8	Pronetalol		2.5989	229.35	-0.8673	0.1951		0.105	-0.061	2.0765	10	0
195	22760-18-5	Proquazone		-1.6081	278.38	-0.174	0.4573		-0.282	-0.287	2.00699	17	0
196	1508-45-8	Mitopodozide		4.8632	474.56	-2.0191	0.3234		-0.07	-0.154	1.52029	9	1
197	81-54-9	Purpurin		3.5531	256.22	-1.9085	0.2399		-0.127	-0.322	0	19	1
198	13292-46-1	Rifampin		32.8672	823.05	-0.5731	26.741		0.124	0.03	1.25841	26	9
199	77-46-3	Acedapsone		0.905	332.41	-0.5686	0.3485		-0.189	-0.015	1.44258	21	0
200	27470-51-5	Suxibuzone		0.7872	438.52	-2.3514	0.4027		0.086	-0.214	1.94484	18	0
201	569-57-3	Chlorotrianisene		1.5415	380.89	0.4855	0.3662		-0.036	0.011	1.68649	23	0
202	846-50-4	Temazepam		2.2528	300.76	-0.2165	0.1395		-0.007	0.015	1.66928	17	0
203	15721-02-5	2,2',5,5'-Tetrachlorobenzidine		3.5996	322.02	1.4774	0.1561		0.162	-0.118	0	14	0
204	116-29-0	Tetradifon		4.4809	356.05	2.552	0.4171		0.353	-0.121	0	15	0
205	97-18-7	Bithionol		3.4824	356.05	2.6472	0.2041		-0.038	-0.075	0	7	0
206	458-37-7	Curcumin		1.9196	368.41	-0.7948	0.0872		-0.02	-0.104	1.43292	12	0
207	865-21-4	Vinblastine		33.2795	811.08	-1.9554	28.2014		-0.039	0	1.2546	9	9
208	5979-28-2	Pigment yellow 16		1.7812	726.48	2.1696	0.1377		-0.008	-0.07	1.33127	18	0
209	5567-15-7	C.I. Pigment Yellow 83		1.7548	818.54	1.7848	0.1265		-0.112	-0.025	1.31449	16	0
210	304-28-9	2,7-Diacetylaminofluorene		5.1636	280.35	-0.7936	0.6662		-0.225	0.103	1.50167	18	1
211	23214-92-8	Doxorubicin		12.7045	543.57	-4.4188	2.8357		0.053	0.01	1.32219	19	3
212	5522-43-0	1-Nitropyrene		12.0582	247.26	0.6601	2.8607		-0.141	-0.069	0	19	3
213	3096-50-2	2-Acetylaminofluoren-9-one		4.3082	237.27	-0.8887	0.4957		-0.254	-0.011	1.44821	17	1

## Sheet: Table S12
Table S12. Experimental and predicted pTD50 values, hat values, standardized residuals, descriptor values of all training, test, and unknown external compounds of the male rat QSAR model defined by Equation (2).
Modeling data set
NO.	CAS	Status	Experimental pTD50	Predicted pTD50	MW	ALogP	HAT i/i (h*=0.6364)	Std.residuals	J_D	ATSC3s	GATS5s	ATSc4	SHaaCH	minaaCH	RM model	The range of the descriptors' values
2	53-96-3	Training	5.2807	4.3079	223.275	0.3845	0.077	-0.8048	1.6116	19.464	1.113	-0.00140737	3.2822	1.94509		Descriptor	Minimum	Maximum
3	81-49-2	test	3.5724	3.9931	381.023	0.5001	0.1579	0.3644	1.9153	34.633	1.657	-0.115692	2.58525	1.71437		J_D	1.1771	2.1873
4	82-28-0	Training	3.7742	3.1827	237.258	-0.6355	0.0784	-0.4898	1.8695	18.646	1.476	-0.0846311	3.19811	1.66694		ATSC3s	7.364	157.572
5	117-79-3	Training	3.3444	2.3619	223.231	-1.2775	0.0761	-0.8125	1.8223	22.125	1.61	-0.0367314	3.85051	1.56102		GATS5s	0.192	2.344
6	97-56-3	test	4.7034	3.7283	225.295	0.5341	0.0533	-0.7967	1.7052	17.646	0.915	-0.0072187	3.51812	1.84875		ATSc4	-0.545241	0.258516
9	103-33-3	Training	3.1743	2.3796	182.226	0	0.0855	-0.6605	1.5987	14.981	1.487	-0.00502108	5.12	1.92306		SHaaCH	0	6.66185
10	119-53-9	Training	0.3814	1.382	212.248	-0.8812	0.1577	0.8667	1.8356	41.972	1.89	0.0402875	5.0253	1.70287		minaaCH	0	2.16773
11	120-32-1	Training	2.1412	3.3898	218.68	0.7402	0.0991	1.0457	1.8016	18.249	0.654	-0.00414034	3.60947	1.79844
15	85-68-7	test	1.782	1.9777	312.365	-0.6837	0.0877	0.1629	1.7811	29.549	1.664	-0.077635	4.78652	1.57316
17	510-15-6	test	1.308	1.6745	325.185	1.005	0.3432	0.3595	2.1295	62.742	1.877	0.107853	3.90262	1.80718
20	87-29-6	Training	1.4305	2.9246	253.299	-0.3616	0.158	1.2943	1.562	19.391	1.87	-0.111036	4.50984	1.65137
23	1163-19-5	Training	2.6355	2.3615	959.171	8.7339	0.8338	-0.5344	2.1873	16.726	0.736	-0.028505	0	0
25	33857-26-0	Training	1.2927	4.6126	253.078	1.1804	0.1042	2.7882	1.6643	23.953	0.604	0.0147327	3.18978	1.99467
26	115-32-2	Training	2.8553	3.0684	370.475	2.4316	0.3449	0.2094	2.1722	55.95	1.352	0.0762807	3.18648	2.15785
28	91-93-0	Training	1.6522	1.7656	296.282	-1.3732	0.1774	0.0994	1.895	24.298	0.824	0.227317	3.6871	1.65578
29	57-41-0	test	2.8566	1.9668	252.273	-0.5759	0.1066	-0.7483	1.8491	26.55	1.424	-0.0681711	5.09707	1.84806
32	122-66-7	Training	4.6972	3.0567	184.242	-0.8408	0.0833	-1.362	1.5987	14.484	0.976	-0.00252467	4.81	1.99375
33	53-95-2	test	5.54	4.3872	239.274	-0.629	0.0561	-0.9433	1.6427	45.38	0.912	0.00774732	3.39682	1.7662
34	129-43-1	Training	3.0102	2.5355	224.215	-0.9879	0.0902	-0.3956	1.8633	39.051	1.612	-0.108893	3.95198	1.41463
37	101-14-4	Training	4.3933	4.6677	267.153	0.445	0.1068	0.2307	1.7755	27.3	0.902	0.02991	2.54913	2.01821
39	90-94-8	Training	4.6033	2.8975	268.36	0.1718	0.0477	-1.3894	1.7691	20.459	1.307	0.0105936	3.96189	1.87254
40	3771-19-5	Training	4.1475	4.6054	310.393	0.0993	0.1949	0.4056	1.5203	53.545	0.406	0.165559	3.55078	1.87226
41	91-20-3	Training	2.8748	2.8854	128.174	0	0.1102	0.009	1.9254	7.364	1.145	0	3.6	2.05787
42	2243-62-1	Training	2.1822	2.9399	158.204	-1.4998	0.1455	0.6516	2.0526	10.112	0.979	0.00389257	2.87194	1.87676
45	86-30-6	Training	-0.4392	0.712	198.225	-0.1138	0.254	1.0595	1.8845	11.656	2.215	-0.0140678	5.23832	1.84167
46	156-10-5	Training	2.994	2.3891	198.225	-0.4437	0.0768	-0.5004	1.6671	14.386	1.036	-0.00768898	4.69815	1.67884
47	303-47-9	Training	5.2082	5.4626	403.815	-0.1599	0.2025	0.2264	1.6368	91.704	1.195	-0.0741009	3.07953	1.57245
48	604-75-1	test	3.9176	2.9477	286.215	-0.3188	0.1634	-0.8429	1.7894	59.311	0.837	0.206689	4.02216	1.8733
49	101-80-4	test	4.4491	3.5389	200.241	-1.6539	0.2685	-0.846	1.6812	22.268	0.192	-0.00982477	4.32242	1.79825
50	77-09-8	Training	0.431	1.1243	318.327	-1.2966	0.3495	0.6834	1.64	36.521	0.78	-0.00970744	6.66185	1.56177
52	842-07-9	Training	4.1421	1.7417	248.285	-0.4603	0.1301	-2.0459	1.537	22.614	1.361	0.000397	5.76875	1.64056
53	50-33-9	test	2.4517	1.936	308.381	-1.6834	0.111	-0.4348	1.7787	32.575	1.765	-0.0281175	5.11029	1.85052
55	50-55-5	Training	4.9538	5.2554	608.688	-0.8642	0.676	0.4212	1.1771	65.362	1.115	0.258516	2.87014	1.55691
58	10048-13-2	Training	6.5945	7.2521	324.288	-1.4653	0.6704	0.9105	1.4836	39.631	1.344	-0.545241	2.53144	1.45597
59	1746-01-6	Training	8.9156	6.5955	321.962	2.669	0.2515	-2.1317	1.6884	41.792	0.453	-0.0670312	2.09048	2.16773
60	96-69-5	test	3.044	3.7704	358.54	4.0664	0.656	0.9845	2.0828	31.499	2.344	-0.0122921	1.5527	1.9246
61	139-65-1	Training	4.4789	4.2871	216.302	-0.9092	0.1602	-0.1664	1.6812	16.095	0.397	-0.00597999	3.52509	1.97649
63	2832-40-8	Training	2.5096	3.3699	269.304	0.11	0.0422	0.6988	1.6519	37.413	1.022	-0.009629	4.01128	1.58881
65	128-66-5	Training	2.076	2.2942	332.358	-0.5276	0.1801	0.1916	1.3798	18.575	1.346	-0.00737114	6.14256	1.87558
66	50594-66-6	Training	3.5861	3.2578	361.657	2.1086	0.7005	-0.4769	1.9026	157.572	0.96	0.00666333	4.39518	0.851401
67	129-15-7	Training	3.7385	3.1828	267.24	0.7745	0.1193	-0.4707	1.9005	57.043	1.642	-0.0851476	3.46167	1.48
68	602-87-9	Training	3.4456	3.5808	199.209	0.7849	0.0867	0.1125	1.8293	15.552	1.256	-0.0147822	2.54929	1.61782
69	2425-85-6	Training	1.7741	2.4494	307.309	0.8418	0.1296	0.5754	1.5866	26.6	1.083	-0.08216	5.09882	1.44178
Unknown external set (132)	CAS	Name		Predicted pTD50	MW	ALOGP	HAT i/i (h*=0.6364)		J_D	ATSC3s	GATS5s	ATSc4	SHaaCH	minaaCH
1	26148-68-5	1,9-dihydro-2H-pyrido[2,3-b]indol-2-imine		5.2472	183.23	-0.5359	0.166		1.7392	13.704	1.084	-0.0416449	1.93895	1.99933
7	92-67-1	[1,1'-biphenyl]-4-amine		3.0548	169.24	-0.7499	0.1458		1.7895	12.82	0.592	-0.000343371	4.15791	1.91898
8	3693-22-9	dibenzo[b,d]furan-2-amine		3.4987	183.22	-0.904	0.0928		1.7513	13.255	0.682	0.000700024	3.6264	1.8519
12	79520-77-7	5,5'-([1,1'-biphenyl]-2,5-diylbis(oxy))bis(2,2-dimethylpentanoic acid)		3.7571	442.6	0.6126	0.1308		1.8136	57.448	0.7	0.00317399	4.01319	1.83859
13	80-05-7	4,4'-(propane-2,2-diyl)diphenol		2.9341	228.31	-0.0064	0.2515		1.9276	26.29	0.327	-0.00200882	3.82613	1.69196
14	2475-45-8	1,4,5,8-tetraaminoanthracene-9,10-dione		4.3171	268.3	-3.5272	0.1761		1.9622	44.547	1.52	-0.184583	2.28076	1.49288
16	101-79-1	4-(4-chlorophenoxy)aniline		3.7724	219.68	-0.1597	0.2491		1.6812	21.521	0.201	-0.0121597	4.11088	1.83102
18	10473-70-8	1-(4-chlorophenyl)-1-phenylprop-2-yn-1-yl hydrogen carbonimidate		1.6243	285.74	1.6935	0.3032		2.1615	35.584	0.941	-0.0208054	4.52401	1.81842
19	117-10-2	1,8-dihydroxyanthracene-9,10-dione		3.4493	240.22	-1.4482	0.1398		1.8953	64.155	1.452	-0.16064	3.58119	1.34226
21	72-55-9	4,4'-(2,2-dichloroethene-1,1-diyl)bis(chlorobenzene)		3.6687	318.02	2.7413	0.1842		1.9487	18.49	1.293	-0.00432106	3.22957	2.29021
22	50-29-3	4,4'-(2,2,2-trichloroethane-1,1-diyl)bis(chlorobenzene)		3.9339	354.48	3.1425	0.2646		2.0365	27.781	1.267	0.00439169	2.87898	2.34589
24	262-12-4	dibenzo[b,e][1,4]dioxine		2.3088	184.2	-0.3082	0.093		1.6825	17.623	1.113	0.138233	4.42833	1.89412
27	5803-51-0	(E)-4-(2,5-dimethoxystyryl)aniline		3.749	255.34	-0.3857	0.1146		1.753	18.801	0.568	-0.00968174	3.62906	1.87439
30	72-56-0	4,4'-(2,2-dichloroethane-1,1-diyl)bis(ethylbenzene)		4.1777	307.28	1.7791	0.1936		1.9073	18.362	1.265	-0.00179082	2.84852	2.30532
31	324-93-6	4'-fluoro-[1,1'-biphenyl]-4-amine		2.5928	187.23	-0.2702	0.2409		1.7803	23.304	0.362	-0.00145996	4.22893	1.45009
35	6471-49-4	(E)-3-hydroxy-4-((2-methoxy-5-nitrophenyl)diazenyl)-N-(3-nitrophenyl)-2-naphthamide		1.3114	487.46	0.1733	0.6429		1.4073	71.049	1.071	-0.13281	7.7695	1.1671
36	21340-68-1	methyl 2-((4'-chloro-[1,1'-biphenyl]-4-yl)oxy)-2-methylpropanoate		3.0864	304.79	1.1955	0.1441		1.7538	40.287	0.59	0.18596	3.85089	1.87122
38	101-61-1	4,4'-methylenebis(N,N-dimethylaniline)		4.371	254.41	0.8918	0.0966		1.667	16.998	1.007	0.0100407	3.37828	2.17016
43	91-59-8	naphthalen-2-amine		3.1103	143.2	-0.7499	0.0994		1.9323	10.351	0.967	-0.000332824	3.25017	1.91898
44	81-16-3	2-aminonaphthalene-1-sulfonic acid		2.4922	223.27	-1.2914	0.2235		2.1633	48.55	1.703	-0.0970658	3.10846	1.50076
51	135-88-6	2-benzylnaphthalene		3.1964	218.31	0.4562	0.1258		1.4762	12.514	0.949	0	5.20302	2.05942
54	117-39-5	2-(3,4-dihydroxyphenyl)-3,5,7-trihydroxy-4H-chromen-4-one		4.9406	302.25	-2.8012	0.4465		1.7353	127.752	1.163	-0.183948	3.48291	0.949156
56	83-79-4	(2R,6aS,12aS)-8,9-dimethoxy-2-(prop-1-en-2-yl)-1,2,12,12a-tetrahydrochromeno[3,4-b]furo[2,3-h]chromen-6(6aH)-one		5.7211	394.45	0.1527	0.3698		1.3468	45.911	1.233	0.0916477	2.40999	1.76505
57	599-79-1	(E)-2-hydroxy-5-((4-(N-(pyridin-2-yl)sulfamoyl)phenyl)diazenyl)benzoic acid		2.6116	398.43	-1.6366	0.4989		1.3766	79.248	1.364	-0.215261	6.85279	1.18467
62	76-87-9	triphenylstannanol		-47.2839	367.05	-0.4603	271.517		1.7909	29.658	1.48	10.8847	6.8016	1.9981
64	6358-85-6	(1Z,1'Z)-2,2'-((1E,1'E)-(3,3'-dichloro-[1,1'-biphenyl]-4,4'-diyl)bis(diazene-2,1-diyl))bis(3-oxo-N-phenylbutanimidic acid)		2.768	629.54	0.5034	0.8679		1.1771	120.517	1.398	-0.0856486	8.6592	1.71808
108	4075-79-0	4-acetylaminobiphenyl		3.1521	211.28	-0.6249	0.0466		1.7138	25.287	1.071	-0.00715097	4.29929	1.90648
109	28314-03-6	1-Acetylaminofluorene		4.2605	223.29	-0.1687	0.067		1.7102	21.862	0.894	-0.0076473	3.22531	1.9644
110	28322-02-3	4-Acetylaminofluorene		4.1215	223.29	-0.1687	0.0633		1.7409	22.112	0.952	-0.00763629	3.22411	1.96065
111	3693-22-9	2-Dibenzofuranamine		3.4987	183.22	-0.904	0.0928		1.7513	13.255	0.682	0.000700024	3.6264	1.8519
112	84-65-1	9,10-Anthracenedione		1.9571	208.22	-0.5276	0.1333		1.8308	17	1.902	-0.0486353	4.28111	1.69991
113	68844-77-9	Astemizole		4.2759	458.63	-0.2905	0.5853		1.0668	42.45	0.373	-0.0889346	6.01841	1.51708
114	64896-26-0	Benzalazine		2.9872	208.28	-0.0684	0.1523		1.4711	14.132	1.676	-0.00771986	4.88874	1.97447
115	92-87-5	Benzidine		3.4972	184.26	-1.4998	0.158		1.7803	16.028	0.463	-0.000669002	3.80964	1.89453
116	50-32-8	Benzo(a)pyrene		2.9437	252.32	0	0.1259		1.4872	10.259	1.085	0	5.4	2.11102
117	120-78-5	Dibenzothiazyl disulfide		5.4282	332.52	2.3624	0.3124		1.2301	9.185	0.939	0.0502839	3.48296	2.14414
118	92-52-4	Biphenyl		2.5683	154.22	0	0.0939		1.7997	9.065	1.033	0	4.5	2.03417
119	145040-37-5	Candesartan cilexetil		6.1342	610.73	-0.8455	1.0003		1.0346	60.321	1.764	-0.554078	6.07253	1.65636
120	63-25-2	Carbaryl		3.0199	201.24	0.2352	0.0945		1.9109	12.388	1.126	-0.0975996	3.62147	1.79537
121	86-74-8	Carbazole		3.3492	167.22	-0.4204	0.0724		1.7616	9.011	1.117	0.00219479	3.73806	2.05329
122	80-33-1	Chlorfenson		2.2314	303.17	1.0958	0.2596		1.8247	42.114	2.238	-0.028303	4.13738	1.65535
123	2227-13-6	Sulfide, p-chlorophenyl 2,4,5-trichlorophenyl		5.768	324.05	3.5678	0.2625		1.8158	23.7	0.512	-0.0181105	2.18487	2.34382
124	94-20-2	Chlorpropamide		3.7494	276.77	-0.5337	0.537		2.3819	67.125	1.614	-0.211854	2.02775	1.5698
125	22494-47-9	Clobuzarit		3.8011	304.79	0.9561	0.131		1.6859	47.249	0.725	0.169728	3.64354	1.97562
126	477-30-5	Demecolcine		4.2081	371.47	-0.6064	0.8214		1.9531	36.51	1.24	0.386483	0.550336	1.98695
127	65765-07-3	3-Hydroxyproquazone		2.7079	294.38	-0.6343	0.0805		1.7985	24.029	1.63	-0.0352172	3.65076	1.60236
128	80-08-0	Dapsone		1.4668	248.33	-1.925	0.1033		1.9276	19.759	1.625	0.000906997	4.19077	1.55297
129	53-19-0	Mitotane		3.6105	320.04	2.6539	0.1876		2.0235	23.452	1.06	0.0136992	3.00065	2.19058
130	52918-63-5	Deltamethrin		2.7815	505.22	1.9373	0.2484		1.5072	53.373	1.903	0.079437	4.84828	1.7546
131	131-01-1	Deserpidine		4.793	578.72	-0.8124	0.6842		1.1845	63.413	1.141	0.290164	3.15207	1.56128
132	63019-65-8	N-1-Diacetamidofluorene		4.0176	265.33	-0.2823	0.0772		1.7897	34.757	1.411	-0.0950431	3.33341	1.84079
133	538-41-0	4,4'-Diaminoazobenzene		3.5917	212.28	-1.4998	0.1596		1.6014	21.401	0.467	-0.0099979	4.34818	1.78902
134	785-30-8	4,4'-Diaminobenzanilide		2.5226	227.29	-2.1346	0.0609		1.7097	24.242	1.533	-0.00712106	4.27457	1.68251
135	439-14-5	Diazepam		3.0817	284.76	-0.0956	0.0995		1.793	29.372	0.804	0.129468	3.82446	1.98942
136	53-70-3	Dibenz(a,h)anthracene		2.6762	278.36	0	0.226		1.3463	12.473	1.028	0	6.3	2.09992
137	4106-66-5	3-Aminodibenzofuran		3.4262	183.22	-0.904	0.0508		1.7392	12.736	1.163	-0.0350147	3.60649	1.85648
138	117-80-6	2,3-Dichlor-1,4-naphthochinon		3.9626	227.04	0.6776	0.3025		2.165	62.409	1.512	-0.0445599	2.07685	1.74426
139	91-94-1	3,3'-Dichlorobenzidine		4.2698	253.14	-0.0112	0.1375		1.8844	25.359	0.606	0.0310735	2.68719	1.99508
140	97-16-5	2,4-Dichlorophenyl benzenesulfonate		2.0788	303.17	1.0958	0.1649		1.8977	42.965	1.964	-0.0233461	4.10509	1.60003
141	56-53-1	Diethylstilbestrol		2.8726	268.38	-0.2302	0.2824		1.9577	28.209	0.311	-0.00640427	3.90163	1.71736
142	21626-89-1	Diftalone		2.7603	264.3	-1.2464	0.1632		1.5706	19.392	1.548	0.112929	4.08323	1.81944
143	65176-75-2	5,6-Dimethoxysterigmatocystin		7.408	384.36	-1.5689	0.4875		1.4983	44.26	1.207	-0.381951	1.42957	1.31593
144	60-11-7	4-(Dimethylamino)azobenzene		3.1416	225.32	0.2178	0.0613		1.6066	17.771	1.081	-0.0119545	4.61192	1.92826
145	57-97-6	7,12-Dimethylbenz(a)anthracene		3.4264	256.36	1.284	0.0753		1.6213	11.312	1.155	0	4.32225	2.10854
146	74-31-7	p-Phenylenediamine, N,N'-diphenyl-		2.5208	260.36	-0.8408	0.3178		1.3336	19.876	0.767	-0.00122568	6.70019	2.01196
147	86-29-3	Diphenylacetonitrile		1.6432	193.26	-0.11	0.1618		1.8845	14.334	1.892	-0.00731637	4.65672	1.96093
148	102-09-0	Diphenyl carbonate		0.968	214.23	0.4597	0.5702		1.6376	18.264	2.898	-0.0820491	5.62671	1.68676
149	40762-15-0	Doxefazepam		1.7545	348.78	-0.2762	0.4017		1.8898	90.426	0.974	0.328418	3.92704	1.31371
150	476-66-4	Ellagic acid		5.3128	302.2	-2.0234	0.6471		1.7461	136.639	0.872	0.203173	1.53403	0.964564
151	29975-16-4	Estazolam		2.6646	294.76	0.4393	0.1109		1.5697	17.248	0.836	0.106083	4.56378	1.77025
152	22966-79-6	Estradiol mustard		5.5055	788.74	3.4345	0.7933		0.9184	78.317	1.057	0.259338	4.73048	2.01166
153	842-00-2	4-Ethylsulfonylnaphthalene-1-sulfonamide		2.8488	299.4	-1.009	0.3457		2.2153	92.618	1.101	-0.00304468	3.10918	1.3392
154	51630-58-1	Fenvalerate		1.0037	419.93	0.8049	0.2715		1.5395	55.282	1.847	0.0911572	6.69473	1.73202
155	363-17-7	Acetamide, N-fluoren-2-yl-2,2,2-trifluoro-		4.7189	277.26	0.9195	0.4844		1.5677	126.817	0.626	0.23299	3.65297	1.49065
156	398-32-3	4'-Fluoro-4-biphenylacetamide		3.0406	229.27	-0.1203	0.1156		1.7128	47.003	0.689	-0.00397011	4.2446	1.42327
157	93957-54-1	Fluvastatin		4.6664	411.51	-0.5015	0.2844		1.6962	94.379	0.735	-0.143016	4.16329	1.41808
158	517-28-2	Hematoxylin		5.0307	302.3	-2.4092	0.4714		1.633	114.575	1.056	0.205225	2.35191	1.33485
159	70-30-4	Hexachlorophene		6.6674	406.89	4.0014	0.6348		2.1341	83.435	0.945	-0.033548	0.818617	2.21504
160	103-16-2	Monobenzone		3.1081	200.25	-0.6028	0.243		1.6012	21.075	0.339	-0.00946068	4.63708	1.61144
161	4463-22-3	N-Hydroxy-4-acetylaminobiphenyl		2.8621	227.28	-1.0852	0.0686		1.7683	46.074	0.971	0.00773942	4.5025	1.71204
162	4363-03-5	3-Hydroxy-4-aminobiphenyl		2.7015	185.24	-1.2102	0.1047		1.8502	23.588	0.702	0.0201992	3.92434	1.6713
163	53-86-1	Indomethacin		3.6343	357.81	0.2922	0.0438		1.757	46.358	1.133	-0.00126855	3.7415	1.77563
164	101-73-5	4-Isopropoxydiphenylamine		3.5918	227.33	-0.5223	0.0928		1.6414	24.903	0.735	0.000799093	4.38948	1.97745
165	520-18-3	Kaempferol		4.2315	286.25	-2.3409	0.3245		1.7204	100.095	1.246	-0.22129	3.92657	0.985041
166	22071-15-4	Ketoprofen		1.8887	254.3	-0.2088	0.0794		1.8849	32.105	1.224	-0.00629743	4.62559	1.64694
167	50264-69-2	Lonidamine		4.5507	321.17	1.2736	0.0557		1.6429	40.798	0.995	-0.0464779	3.4112	1.81268
168	67-98-1	Ethamoxytriphetol		1.5629	419.61	0.1119	0.1983		1.5338	43.817	1.226	0.163207	6.25508	1.92418
169	80830-39-3	3-Methoxy-4-aminoazobenzene		2.8715	227.29	-0.8017	0.0487		1.6794	20.991	1.044	-0.00621534	4.37098	1.74819
170	3544-23-8	2-Methoxy-4-aminoazobenzene		2.4837	227.29	-0.8017	0.0458		1.7261	19.676	1.174	0.015125	4.35819	1.72157
171	5834-17-3	2-Methoxy-3-dibenzofuranamine		3.5386	213.25	-0.9558	0.0548		1.7371	16.152	1.159	0.00765808	3.25046	1.79977
172	72-43-5	Methoxychlor		2.866	345.66	1.5503	0.1334		1.9914	22.055	1.188	0.0248857	3.58037	2.07992
173	55-80-1	3-Methyl-4'-(dimethylamino)azobenzene		3.5553	239.35	0.8598	0.0563		1.6273	18.978	1.258	-0.0119343	4.01714	1.9491
174	11013-97-1	Methyl hesperidin		9.806	624.65	-4.4515	2.7864		1.1937	291.379	0.98	-0.0196402	3.2843	1.12117
175	16699-10-8	4-(4-N-Methyl-N-nitrosaminostyryl)quinoline		3.2289	289.36	0.4563	0.1404		1.4089	16.94	0.981	-0.0282978	5.18482	1.8153
176	56-49-5	3-Methylcholanthrene		4.5621	268.37	0.7668	0.1359		1.4405	12.62	1.085	0	3.83524	2.12071
177	838-88-0	4,4'-Methylene bis(2-methylaniline)		4.8303	226.35	0.2404	0.1585		1.7755	19	0.424	-0.00103145	2.56247	1.96709
178	119-47-1	p-Cresol, 2,2'-methylenebis(6-tert- butyl-		3.9154	340.55	3.932	0.4837		2.1311	32.254	1.934	0.00465355	1.58377	2.01697
179	90-12-0	1-Methylnaphthalene		3.0681	142.21	0.642	0.1515		1.9932	7.935	1.327	0	3.05403	2.0712
180	5800-19-1	Metiapine		4.859	323.5	0.9179	0.1503		1.5486	19.126	1.01	0.0622769	2.98057	2.12254
181	86-86-2	2-(1-Naphthyl)acetamide		3.4194	185.24	-0.6	0.0953		1.9404	27.024	0.987	-0.00282266	3.26953	1.93759
182	86-87-3	alpha-Naphthylacetic acid		3.2828	186.22	-0.205	0.084		1.9404	30.977	1.002	-0.00389234	3.35574	1.85759
183	93-46-9	p-Phenylenediamine, N,N'-(di-2-naphthyl)-		2.0295	360.48	-0.8408	0.6812		1.0214	23.361	0.916	-0.00120075	8.51249	2.06617
184	86-88-4	1-(1-Naphthyl)-2-thiourea		3.2921	202.3	0.2714	0.1115		1.9404	13.199	1.085	-0.0032744	3.23959	2.04098
185	51715-17-4	N-Nitrosochlordiazepoxide		3.1605	328.78	0.3019	0.0593		1.8204	38.717	1.171	-0.014911	4.12487	1.89348
186	27753-52-2	Nonabromobiphenyl		5.9591	864.23	7.9992	0.8974		2.2617	12.719	1.209	-0.0057713	0.321978	2.78027
187	94-36-0	Benzoyl peroxide		0.5258	242.24	-0.1822	0.2515		1.6558	30.513	1.933	0.125899	5.71749	1.56814
188	3096-50-2	2-Acetylaminofluoren-9-one		3.5498	237.27	-0.8887	0.0514		1.6812	33.026	1.375	-0.0126558	3.6541	1.73519
189	92-84-2	Phenothiazine		3.8556	199.29	0.1702	0.0881		1.6825	9.402	0.956	0.0350272	3.51819	2.10329
190	71835-85-3	Phenylethyl 3-methylcaffeate		3.0377	298.36	0.0251	0.1066		1.5395	37.65	1.169	0.0881906	4.09539	1.51314
191	90-43-7	2-Phenylphenol		1.6653	170.22	-0.4603	0.0819		1.8848	12.623	1.444	-0.00144939	4.37406	1.69676
192	92-69-3	4-Hydroxybiphenyl		2.6387	170.22	-0.4603	0.2092		1.7895	15.464	0.441	-0.00100557	4.37373	1.69676
193	2955-38-6	Prazepam		3.8644	324.83	0.0188	0.1368		1.5477	32.394	1.162	0.134158	3.72331	2.01053
194	54-80-8	Pronetalol		3.8902	229.35	-0.8673	0.082		1.7792	29.826	1.117	0.0577099	3.13729	1.99505
195	22760-18-5	Proquazone		2.6612	278.38	-0.174	0.2614		1.7965	16.993	2.157	-0.030351	3.85082	1.96331
196	1508-45-8	Mitopodozide		4.1894	474.56	-2.0191	0.3208		1.6999	63.838	1.12	0.251005	2.39312	1.72687
197	81-54-9	Purpurin		3.8869	256.22	-1.9085	0.3075		1.9153	97.827	1.209	-0.173805	3.04621	0.840556
198	13292-46-1	Rifampin		8.1347	823.05	-0.5731	1.2336		1.4792	150.48	0.832	-0.216709	0	0
199	77-46-3	Acedapsone		2.2061	332.41	-0.5686	0.0771		1.807	52.607	1.45	-0.00210864	4.56444	1.49743
200	27470-51-5	Suxibuzone		4.2296	438.52	-2.3514	0.6444		1.8389	89.97	1.002	-0.33158	5.34649	1.73203
201	569-57-3	Chlorotrianisene		1.7831	380.89	0.4855	0.1799		1.655	20.262	0.965	0.0215872	6.05583	2.00444
202	846-50-4	Temazepam		2.5173	300.76	-0.2165	0.1848		1.8409	51.092	0.99	0.238031	3.96543	1.92305
203	15721-02-5	2,2',5,5'-Tetrachlorobenzidine		5.0928	322.02	1.4774	0.2929		2.0552	35.6	0.932	-0.00547828	1.65036	2.18262
204	116-29-0	Tetradifon		4.0709	356.05	2.552	0.268		2.0534	66.879	1.615	-0.0742246	2.68412	1.81446
205	97-18-7	Bithionol		5.8406	356.05	2.6472	0.3153		1.9823	58.16	0.776	-0.0174727	1.69118	2.15415
206	458-37-7	Curcumin		3.8833	368.41	-0.7948	0.1243		1.6029	68.477	0.985	0.0992313	3.55063	1.46111
207	865-21-4	Vinblastine		9.2629	811.08	-1.9554	0.8842		1.2218	137.813	1.001	-0.192129	2.80463	1.94488
208	5979-28-2	Pigment yellow 16		6.0819	726.48	2.1696	0.801		1.2006	138.141	1.177	-0.209689	6.12497	1.78439
209	5567-15-7	C.I. Pigment Yellow 83		5.0015	818.54	1.7848	0.6737		1.2171	142.002	1.127	0.0548106	5.84373	1.65347
210	304-28-9	2,7-Diacetylaminofluorene		5.3365	280.35	-0.7936	0.1113		1.5584	45.861	1.015	-0.0142049	2.97748	1.91375
211	23214-92-8	Doxorubicin		10.4314	543.57	-4.4188	1.7937		1.4854	220.942	0.94	-0.302883	1.84997	1.38268
212	5522-43-0	1-Nitropyrene		2.2966	247.26	0.6601	0.0788		1.6491	13.688	1.143	-0.0147822	4.645	1.58509
213	3096-50-2	2-Acetylaminofluoren-9-one		3.5498	237.27	-0.8887	0.0514		1.6812	33.026	1.375	-0.0126558	3.6541	1.73519

## Sheet: Table S13
Table S13. Experimental and predicted pTD50 values, hat values, standardized residuals, descriptor values of all training, test, and unknown external compounds of the female mouse QSAR model defined by Equation (3).
Modeling data set
NO.	CAS	Status	Experimental pTD50	Predicted pTD50	Mw	ALogP	HAT i/i (h*=0.6364)	Std.residuals	J_D	SpMaxA_B(s)	GATS8s	SpMax2_Bh(v)	Cl-089	minaaaC	MF model	The range of the descriptors' values
1	26148-68-5	Training	3.7115	3.9204	183.214	-0.5359	0.3736	0.3452	1.7392	0.406	3.12	3.54	0	1.10125		Descriptor	Minimum	Maximum
2	53-96-3	test	4.6694	4.3625	223.275	0.3845	0.2032	-0.4497	1.6116	0.372	0.881	3.651	0	0		J_D	1.3766	2.1873
3	81-49-2	Training	2.8908	1.9145	381.023	0.5001	0.0821	-1.3326	1.9153	0.391	0.289	3.73	0	0		SpMaxA_B(s)	0.213	0.521
4	82-28-0	Training	3.1347	1.8171	237.258	-0.6355	0.0957	-1.8121	1.8695	0.413	0.183	3.731	0	0		GATS8s	0	4.567
5	117-79-3	Training	1.8985	2.1195	223.231	-1.2775	0.1066	0.3058	1.8223	0.437	0.349	3.707	0	0		SpMax2_Bh(v)	3.389	3.881
7	92-67-1	Training	5.2315	3.9020	169.227	-0.7499	0.1228	-1.8566	1.7895	0.37	1.945	3.671	0	0		Cl-089	0	4
10	119-53-9	test	0.4015	0.7542	212.248	-0.8812	0.2104	0.5191	1.8356	0.464	0.141	3.786	0	0		minaaaC	0	1.30955
11	120-32-1	Training	2.5048	2.9879	218.68	0.7402	0.1073	0.6688	1.8016	0.421	1.156	3.753	1	0
12	79520-77-7	Training	3.7868	3.9993	442.552	0.6126	0.2492	0.3208	1.8136	0.234	0.518	3.716	0	0
13	80-05-7	Training	1.2412	2.4015	228.291	-0.0064	0.1068	1.6056	1.9276	0.371	1.792	3.747	0	0
15	85-68-7	test	1.5709	2.0683	312.365	-0.6837	0.0687	0.6740	1.7811	0.323	0.864	3.823	0	0
16	101-79-1	Training	2.9896	4.4128	219.668	-0.1597	0.0760	1.9365	1.6812	0.327	1.729	3.76	1	0
17	510-15-6	Training	2.5837	2.9896	325.185	1.005	0.2555	0.6152	2.1295	0.354	0.372	3.762	2	0
18	10473-70-8	test	3.6888	2.5333	285.727	1.6935	0.1832	-1.6720	2.1615	0.322	0.825	3.753	1	0
20	87-29-6	Training	2.0109	2.2513	253.301	-0.3616	0.1316	0.3373	1.562	0.391	1.448	3.836	0	0
21	72-55-9	Training	4.5270	4.7679	318.018	2.7413	0.1509	0.3419	1.9487	0.281	1.624	3.762	2	0
22	50-29-3	Training	4.7847	4.4779	354.476	3.1425	0.1856	-0.4446	2.0365	0.271	1.417	3.762	2	0
23	1163-19-5	Training	1.4581	1.2710	959.171	8.7339	0.4495	-0.3298	2.1873	0.213	0.748	3.852	0	0
27	5803-51-0	test	3.2252	3.2573	255.317	-0.3857	0.1310	0.0450	1.753	0.254	1.018	3.792	0	0
29	57-41-0	Training	3.6303	2.6655	252.273	-0.5759	0.0638	-1.3041	1.8491	0.335	0.717	3.743	0	0
30	72-56-0	test	2.0692	2.9075	307.258	1.7791	0.1822	1.2123	1.9073	0.244	1.583	3.801	0	0
32	122-66-7	test	3.8504	3.2561	184.242	-0.8408	0.1027	-0.8205	1.5987	0.328	0.954	3.778	0	0
36	21340-68-1	Training	4.0860	4.3436	304.77	1.1955	0.0905	0.3532	1.7538	0.354	0.812	3.698	1	0
38	101-61-1	test	3.0895	3.6310	254.377	0.8918	0.2096	0.7966	1.667	0.241	0.412	3.778	0	0
39	90-94-8	Training	3.7044	3.5935	268.36	0.1718	0.5233	-0.2102	1.7691	0.371	4.567	3.778	0	0
42	2243-62-1	Training	3.0886	3.6360	158.204	-1.4998	0.3287	0.8738	2.0526	0.412	0	3.389	0	1.02546
43	91-59-8	Training	3.3566	3.4325	143.189	-0.7499	0.3129	0.1198	1.9323	0.441	0	3.393	0	1.20139
44	81-16-3	Training	-0.5937	0.4378	223.246	-1.2914	0.3154	1.6304	2.1633	0.518	0	3.607	0	0.496399
46	156-10-5	Training	1.9450	1.7984	198.225	-0.4437	0.2484	-0.2210	1.6671	0.502	1.148	3.751	0	0
48	604-75-1	test	4.1608	3.9597	286.715	0.2344	0.0525	-0.2702	1.7894	0.318	1.333	3.761	1	0
49	101-80-4	Training	3.2681	3.4656	200.241	-1.6539	0.0828	0.2696	1.6812	0.326	1.573	3.758	0	0
51	135-88-6	Training	1.5885	1.3339	218.299	0.4562	0.4557	-0.4513	1.4762	0.277	1.061	3.827	0	1.30955
52	842-07-9	Training	2.4743	1.5244	248.285	-0.4603	0.2165	-1.4035	1.537	0.332	0.985	3.809	0	0.890908
53	50-33-9	Training	1.7102	2.4268	308.381	-1.6834	0.0773	0.9757	1.7787	0.324	0.38	3.78	0	0
57	599-79-1	Training	2.5875	3.4707	398.393	-1.6366	0.2900	1.3709	1.3766	0.276	0.522	3.849	0	0
59	1746-01-6	Training	8.6293	8.0893	321.962	2.669	0.6033	-1.1213	1.6884	0.284	2.512	3.741	4	0
61	139-65-1	Training	3.8126	3.6240	216.302	-0.9092	0.0977	-0.2597	1.6812	0.321	1.875	3.758	0	0
62	76-87-9	Training	3.4312	2.9242	367.035	-0.4603	0.1007	-0.6992	1.7909	0.312	0.284	3.743	0	0
63	2832-40-8	Training	2.4216	2.8206	269.304	0.11	0.0811	0.5443	1.6519	0.316	0.89	3.805	0	0
65	128-66-5	test	1.1432	1.6616	332.358	-0.5276	0.3416	0.8356	1.3798	0.286	1.193	3.88	0	0.908845
66	50594-66-6	Training	3.0424	2.3584	361.657	2.1086	0.1013	-0.9437	1.9026	0.355	1.075	3.822	1	0
68	602-87-9	Training	3.6384	2.9473	199.209	0.7849	0.2565	-1.0484	1.8293	0.521	0	3.458	0	0.784722
69	2425-85-6	Training	0.1779	0.6279	307.309	0.8418	0.2607	0.6845	1.5866	0.34	0.911	3.881	0	0.727791
Unknown external set (132)				Predicted pTD50	MW	ALogP	HAT i/i (h*=0.6364)		J_D	SpMaxA_B(s)	GATS8s	SpMax2_Bh(v)	Cl-089	minaaaC
6	97-56-3	(E)-2-methyl-4-(o-tolyldiazenyl)aniline		0.7314	225.32	0.5341	0.3479		1.7052	0.292	0.601	3.815	0	1.10125
8	3693-22-9	dibenzo[b,d]furan-2-amine		4.3245	183.22	-0.904	0.1667		1.7513	0.367	0.991	3.622	0	0
9	103-33-3	(E)-1,2-diphenyldiazene		1.4721	182.24	0	0.1825		1.5987	0.354	0.723	3.772	0	0.889259
14	2475-45-8	1,4,5,8-tetraaminoanthracene-9,10-dione		2.0539	268.3	-3.5272	0.0804		1.9622	0.372	0.561	3.728	0	0
19	117-10-2	1,8-dihydroxyanthracene-9,10-dione		2.1814	240.22	-1.4482	0.0815		1.8953	0.413	0.464	3.703	0	0
24	262-12-4	dibenzo[b,e][1,4]dioxine		3.4992	184.2	-0.3082	0.1319		1.6825	0.355	0.378	3.698	0	0
25	33857-26-0	2,7-dichlorodibenzo[b,e][1,4]dioxine		6.3895	253.08	1.1804	0.2348		1.6643	0.315	2.758	3.72	2	0
26	115-32-2	2,2,2-trichloro-1,1-bis(4-chlorophenyl)ethan-1-ol		3.4423	370.48	2.4316	0.2519		2.1722	0.314	0.988	3.762	2	0
28	91-93-0	4,4'-diisocyanato-3,3'-dimethoxy-1,1'-biphenyl		2.8374	296.3	-1.3732	0.0748		1.895	0.341	0.684	3.711	0	0
31	324-93-6	4'-fluoro-[1,1'-biphenyl]-4-amine		2.1371	187.23	-0.2702	0.5505		1.7803	0.586	2.721	3.676	0	0
33	53-95-2	N-(9H-fluoren-2-yl)-N-hydroxyacetamide		4.056	239.29	-0.629	0.1691		1.6427	0.413	1.35	3.65	0	0
34	129-43-1	1-hydroxyanthracene-9,10-dione		2.0726	224.22	-0.9879	0.103		1.8633	0.437	0.373	3.7	0	0
35	6471-49-4	(E)-3-hydroxy-4-((2-methoxy-5-nitrophenyl)diazenyl)-N-(3-nitrophenyl)-2-naphthamide		3.8597	487.46	0.1733	0.3075		1.4073	0.217	0.947	3.866	0	0
37	101-14-4	4,4'-methylenebis(2-chloroaniline)		5.1644	267.17	0.445	0.1378		1.7755	0.293	1.87	3.777	2	0
40	3771-19-5	2-methyl-2-(4-(1,2,3,4-tetrahydronaphthalen-1-yl)phenoxy)propanoic acid		3.436	310.42	0.0993	0.1647		1.5203	0.325	0.657	3.779	0	0
41	91-20-3	naphthalene		4.7611	128.18	0	0.4126		1.9254	0.47	0	3.368	0	0.467636
45	86-30-6	N,N-diphenylnitrous amide		0.7731	198.24	-0.1138	0.2554		1.8845	0.502	0.16	3.743	0	0
47	303-47-9	(S)-2-(((Z)-((R)-5-chloro-8-hydroxy-3-methyl-1-oxoisochroman-7-yl)(hydroxy)methylene)amino)-3-phenylpropanoic acid		3.7964	403.84	-0.1599	0.1046		1.6368	0.267	1.205	3.851	1	0
50	77-09-8	3,3-bis(4-hydroxyphenyl)isobenzofuran-1(3H)-one		1.4489	318.34	-1.2966	0.3093		1.64	0.31	1.221	3.767	0	1.20139
54	117-39-5	2-(3,4-dihydroxyphenyl)-3,5,7-trihydroxy-4H-chromen-4-one		1.8171	302.25	-2.8012	0.0912		1.7353	0.338	1.426	3.793	0	0.496399
55	50-55-5	methyl (1S,2R,3R,4aS,13bR,14aS)-2,11-dimethoxy-3-((3,4,5-trimethoxybenzoyl)oxy)-1,2,3,4,4a,5,7,8,13,13b,14,14a-dodecahydroindolo[2',3':3,4]pyrido[1,2-b]isoquinoline-1-carboxylate		2.6767	608.75	-0.8642	0.7824		1.1771	0.169	1.23	3.889	0	1.30955
56	83-79-4	(2R,6aS,12aS)-8,9-dimethoxy-2-(prop-1-en-2-yl)-1,2,12,12a-tetrahydrochromeno[3,4-b]furo[2,3-h]chromen-6(6aH)-one		3.9703	394.45	0.1527	0.3006		1.3468	0.256	1.119	3.85	0	0
58	10048-13-2	(3aR,12cS)-8-hydroxy-6-methoxy-3a,12c-dihydro-7H-furo[3',2':4,5]furo[2,3-c]xanthen-7-one		3.6948	324.3	-1.4653	0.1721		1.4836	0.309	1.079	3.793	0	0
60	96-69-5	4,4'-thiobis(2-(tert-butyl)-5-methylphenol)		1.065	358.59	4.0664	0.2965		2.0828	0.253	0.621	3.864	0	0
64	6358-85-6	(1Z,1'Z)-2,2'-((1E,1'E)-(3,3'-dichloro-[1,1'-biphenyl]-4,4'-diyl)bis(diazene-2,1-diyl))bis(3-oxo-N-phenylbutanimidic acid)		7.4445	629.54	0.5034	0.8035		1.1771	0.169	1.338	3.839	2	0
67	129-15-7	2-methyl-1-nitroanthracene-9,10-dione		2.0046	267.25	0.7745	0.0747		1.9005	0.391	1.07	3.75	0	0
108	4075-79-0	4-acetylaminobiphenyl		2.8259	211.28	-0.6249	0.1481		1.7138	0.464	1.104	3.683	0	0
109	28314-03-6	1-Acetylaminofluorene		3.9998	223.29	-0.1687	0.1945		1.7102	0.437	2.207	3.643	0	0
110	28322-02-3	4-Acetylaminofluorene		3.683	223.29	-0.1687	0.1461		1.7409	0.437	1.471	3.638	0	0
111	3693-22-9	2-Dibenzofuranamine		2.7941	183.22	-0.904	0.1109		1.7513	0.367	0.991	3.622	0	0.889259
112	84-65-1	9,10-Anthracenedione		1.8403	208.22	-0.5276	0.1552		1.8308	0.465	0.078	3.698	0	0
113	68844-77-9	Astemizole		3.0541	458.63	-0.2905	0.6872		1.0668	0.241	0.63	3.864	0	0.975962
114	64896-26-0	Benzalazine		3.3308	208.28	-0.0684	0.1945		1.4711	0.305	0.62	3.815	0	0
115	92-87-5	Benzidine		3.9856	184.26	-1.4998	0.12		1.7803	0.345	1.824	3.682	0	0
116	50-32-8	Benzo(a)pyrene		1.1327	252.32	0	0.5381		1.4872	0.247	1.289	3.868	0	1.31795
117	120-78-5	Dibenzothiazyl disulfide		0.8395	332.52	2.3624	0.7874		1.2301	0.245	1.522	3.967	0	1.35134
118	92-52-4	Biphenyl		3.4102	154.22	0	0.0972		1.7997	0.384	0.693	3.66	0	0
119	145040-37-5	Candesartan cilexetil		3.7611	610.73	-0.8455	0.7227		1.0346	0.165	1.246	3.95	0	0.550427
120	63-25-2	Carbaryl		4.438	201.24	0.2352	0.3145		1.9109	0.422	0.715	3.388	0	0.953889
121	86-74-8	Carbazole		1.8933	167.22	-0.4204	0.2269		1.7616	0.377	0	3.61	0	1.21176
122	80-33-1	Chlorfenson		2.8069	303.17	1.0958	0.3426		1.8247	0.429	0.18	3.8	2	0
123	2227-13-6	Sulfide, p-chlorophenyl 2,4,5-trichlorophenyl		6.8844	324.05	3.5678	0.5435		1.8158	0.296	1.981	3.777	4	0
124	94-20-2	Chlorpropamide		3.3118	276.77	-0.5337	0.3752		2.3819	0.454	1.041	3.537	1	0
125	22494-47-9	Clobuzarit		4.56	304.79	0.9561	0.0971		1.6859	0.356	1.246	3.711	1	0
126	477-30-5	Demecolcine		3.41	371.47	-0.6064	0.1704		1.9531	0.275	0.807	3.702	0	0
127	65765-07-3	3-Hydroxyproquazone		2.4669	294.38	-0.6343	0.0559		1.7985	0.338	0.827	3.774	0	0
128	80-08-0	Dapsone		1.0031	248.33	-1.925	0.1661		1.9276	0.454	0.483	3.758	0	0
129	53-19-0	Mitotane		4.2362	320.04	2.6539	0.1911		2.0235	0.273	0.657	3.761	2	0
130	52918-63-5	Deltamethrin		3.1012	505.22	1.9373	0.1543		1.5072	0.265	1.394	3.876	0	0
131	131-01-1	Deserpidine		2.8666	578.72	-0.8124	0.6845		1.1845	0.177	1.223	3.888	0	1.14646
132	63019-65-8	N-1-Diacetamidofluorene		3.9006	265.33	-0.2823	0.1152		1.7897	0.372	1.689	3.662	0	0
133	538-41-0	4,4'-Diaminoazobenzene		3.1658	212.28	-1.4998	0.1247		1.6014	0.311	0.576	3.786	0	0
134	785-30-8	4,4'-Diaminobenzanilide		1.6066	227.29	-2.1346	0.1379		1.7097	0.437	0.877	3.795	0	0
135	439-14-5	Diazepam		3.4188	284.76	-0.0956	0.0592		1.793	0.371	1.347	3.764	1	0
136	53-70-3	Dibenz(a,h)anthracene		0.4594	278.36	0	0.7603		1.3463	0.223	1.073	3.975	0	1.30105
137	4106-66-5	3-Aminodibenzofuran		3.1192	183.22	-0.904	0.1228		1.7392	0.367	1.621	3.623	0	0.852963
138	117-80-6	2,3-Dichlor-1,4-naphthochinon		4.9658	227.04	0.6776	0.52		2.165	0.531	0	3.451	2	0
139	91-94-1	3,3'-Dichlorobenzidine		5.1106	253.14	-0.0112	0.1614		1.8844	0.312	0.729	3.703	2	0
140	97-16-5	2,4-Dichlorophenyl benzenesulfonate		2.4649	303.17	1.0958	0.3499		1.8977	0.429	0.284	3.81	2	0
141	56-53-1	Diethylstilbestrol		2.5054	268.38	-0.2302	0.1741		1.9577	0.316	2.185	3.783	0	0
142	21626-89-1	Diftalone		2.1888	264.3	-1.2464	0.1261		1.5706	0.372	0.71	3.831	0	0
143	65176-75-2	5,6-Dimethoxysterigmatocystin		3.981	384.36	-1.5689	0.1992		1.4983	0.265	1.217	3.803	0	0
144	60-11-7	4-(Dimethylamino)azobenzene		3.6645	225.32	0.2178	0.1187		1.6066	0.291	1.434	3.785	0	0
145	57-97-6	7,12-Dimethylbenz(a)anthracene		0.6649	256.36	1.284	0.5634		1.6213	0.244	1.146	3.866	0	1.31739
146	74-31-7	p-Phenylenediamine, N,N'-diphenyl-		4.7606	260.36	-0.8408	0.4103		1.3336	0.232	1.068	3.807	0	0
147	86-29-3	Diphenylacetonitrile		1.2481	193.26	-0.11	0.1516		1.8845	0.454	0.23	3.743	0	0
148	102-09-0	Diphenyl carbonate		1.451	214.23	0.4597	0.2364		1.6376	0.465	0.178	3.786	0	0
149	40762-15-0	Doxefazepam		3.2347	348.78	-0.2762	0.0557		1.8898	0.342	1.2	3.769	1	0
150	476-66-4	Ellagic acid		4.1247	302.2	-2.0234	0.1363		1.7461	0.338	1.056	3.663	0	0
151	29975-16-4	Estazolam		5.2547	294.76	0.4393	0.1987		1.5697	0.241	1.452	3.78	1	0
152	22966-79-6	Estradiol mustard		6.0841	788.74	3.4345	1.1566		0.9184	0.143	1.177	3.887	0	0
153	842-00-2	4-Ethylsulfonylnaphthalene-1-sulfonamide		-0.0832	299.4	-1.009	0.4711		2.2153	0.407	1.481	3.771	0	0.421885
154	51630-58-1	Fenvalerate		4.2758	419.93	0.8049	0.1518		1.5395	0.248	1.507	3.863	1	0
155	363-17-7	Acetamide, N-fluoren-2-yl-2,2,2-trifluoro-		4.519	277.26	0.9195	0.2566		1.5677	0.426	2.256	3.651	0	0
156	398-32-3	4'-Fluoro-4-biphenylacetamide		2.4767	229.27	-0.1203	0.1826		1.7128	0.482	1.52	3.71	0	0
157	93957-54-1	Fluvastatin		1.7885	411.51	-0.5015	0.2556		1.6962	0.273	0.988	3.771	0	1.01191
158	517-28-2	Hematoxylin		3.8031	302.3	-2.4092	0.1222		1.633	0.291	1.415	3.766	0	0
159	70-30-4	Hexachlorophene		7.0099	406.89	4.0014	1.4113		2.1341	0.301	1.137	3.797	6	0
160	103-16-2	Monobenzone		2.2349	200.25	-0.6028	0.1459		1.6012	0.421	0.671	3.781	0	0
161	4463-22-3	N-Hydroxy-4-acetylaminobiphenyl		3.0725	227.28	-1.0852	0.1166		1.7683	0.437	1.637	3.684	0	0
162	4363-03-5	3-Hydroxy-4-aminobiphenyl		2.6339	185.24	-1.2102	0.1129		1.8502	0.451	1.241	3.674	0	0
163	53-86-1	Indomethacin		1.9646	357.81	0.2922	0.2203		1.757	0.299	0.804	3.833	1	0.690895
164	101-73-5	4-Isopropoxydiphenylamine		4.1823	227.33	-0.5223	0.1562		1.6414	0.278	1.717	3.752	0	0
165	520-18-3	Kaempferol		2.5538	286.25	-2.3409	0.0579		1.7204	0.354	1.304	3.791	0	0
166	22071-15-4	Ketoprofen		1.4979	254.3	-0.2088	0.09		1.8849	0.394	0.644	3.78	0	0
167	50264-69-2	Lonidamine		2.7883	321.17	1.2736	0.3906		1.6429	0.356	1.264	3.843	2	0.69714
168	67-98-1	Ethamoxytriphetol		4.3007	419.61	0.1119	0.308		1.5338	0.203	0.95	3.806	0	0
169	80830-39-3	3-Methoxy-4-aminoazobenzene		3.1887	227.29	-0.8017	0.0999		1.6794	0.294	0.81	3.782	0	0
170	3544-23-8	2-Methoxy-4-aminoazobenzene		3.0416	227.29	-0.8017	0.089		1.7261	0.294	0.82	3.781	0	0
171	5834-17-3	2-Methoxy-3-dibenzofuranamine		3.3675	213.25	-0.9558	0.1305		1.7371	0.322	1.151	3.632	0	0.791204
172	72-43-5	Methoxychlor		2.8986	345.66	1.5503	0.2077		1.9914	0.245	0.788	3.754	0	0
173	55-80-1	3-Methyl-4'-(dimethylamino)azobenzene		3.4819	239.35	0.8598	0.1175		1.6273	0.275	1.442	3.806	0	0
174	11013-97-1	Methyl hesperidin		5.856	624.65	-4.4515	0.7672		1.1937	0.169	1.113	3.807	0	0
175	16699-10-8	4-(4-N-Methyl-N-nitrosaminostyryl)quinoline		1.1442	289.36	0.4563	0.3501		1.4089	0.342	0.824	3.85	0	0.984889
176	56-49-5	3-Methylcholanthrene		0.7999	268.37	0.7668	0.6438		1.4405	0.232	1.239	3.915	0	1.33508
177	838-88-0	4,4'-Methylene bis(2-methylaniline)		2.9563	226.35	0.2404	0.0905		1.7755	0.283	1.354	3.798	0	0
178	119-47-1	p-Cresol, 2,2'-methylenebis(6-tert- butyl-		1.2626	340.55	3.932	0.3947		2.1311	0.253	1.714	3.867	0	0
179	90-12-0	1-Methylnaphthalene		3.0384	142.21	0.642	0.3392		1.9932	0.428	0	3.4	0	1.32639
180	5800-19-1	Metiapine		4.8523	323.5	0.9179	0.372		1.5486	0.209	0.837	3.75	0	0
181	86-86-2	2-(1-Naphthyl)acetamide		2.4935	185.24	-0.6	0.317		1.9404	0.531	1.434	3.454	0	1.10537
182	86-87-3	alpha-Naphthylacetic acid		3.0537	186.22	-0.205	0.4001		1.9404	0.534	2.314	3.444	0	1.02537
183	93-46-9	p-Phenylenediamine, N,N'-(di-2-naphthyl)-		1.7008	360.48	-0.8408	1.0038		1.0214	0.17	1.179	4.018	0	1.23805
184	86-88-4	1-(1-Naphthyl)-2-thiourea		4.412	202.3	0.2714	0.4067		1.9404	0.359	1.358	3.411	0	1.22241
185	51715-17-4	N-Nitrosochlordiazepoxide		3.63	328.78	0.3019	0.0515		1.8204	0.327	0.996	3.762	1	0
186	27753-52-2	Nonabromobiphenyl		1.7976	864.23	7.9992	0.4527		2.2617	0.228	0.58	3.773	0	0
187	94-36-0	Benzoyl peroxide		1.8831	242.24	-0.1822	0.1269		1.6558	0.413	1.422	3.822	0	0
188	3096-50-2	2-Acetylaminofluoren-9-one		4.0226	237.27	-0.8887	0.1547		1.6812	0.413	1.59	3.649	0	0
189	92-84-2	Phenothiazine		3.8681	199.29	0.1702	0.1284		1.6825	0.333	0.819	3.698	0	0
190	71835-85-3	Phenylethyl 3-methylcaffeate		2.5939	298.36	0.0251	0.1194		1.5395	0.338	0.922	3.839	0	0
191	90-43-7	2-Phenylphenol		1.9249	170.22	-0.4603	0.1759		1.8848	0.486	0.13	3.662	0	0
192	92-69-3	4-Hydroxybiphenyl		3.3477	170.22	-0.4603	0.3403		1.7895	0.486	3.111	3.663	0	0
193	2955-38-6	Prazepam		4.2707	324.83	0.0188	0.1353		1.5477	0.323	1.132	3.794	1	0
194	54-80-8	Pronetalol		2.7882	229.35	-0.8673	0.2002		1.7792	0.369	0.552	3.561	0	1.17463
195	22760-18-5	Proquazone		2.2058	278.38	-0.174	0.066		1.7965	0.354	0.439	3.772	0	0
196	1508-45-8	Mitopodozide		3.9431	474.56	-2.0191	0.2979		1.6999	0.186	0.785	3.796	0	0
197	81-54-9	Purpurin		2.4228	256.22	-1.9085	0.0689		1.9153	0.391	0.817	3.705	0	0
198	13292-46-1	Rifampin		5.7119	823.05	-0.5731	0.6892		1.4792	0.126	1.153	3.815	0	-0.312223
199	77-46-3	Acedapsone		2.4232	332.41	-0.5686	0.0585		1.807	0.335	0.747	3.775	0	0
200	27470-51-5	Suxibuzone		3.1971	438.52	-2.3514	0.1794		1.8389	0.234	0.755	3.78	0	0
201	569-57-3	Chlorotrianisene		5.1604	380.89	0.4855	0.2798		1.655	0.181	1.027	3.796	1	0
202	846-50-4	Temazepam		3.3187	300.76	-0.2165	0.052		1.8409	0.354	1.099	3.764	1	0
203	15721-02-5	2,2',5,5'-Tetrachlorobenzidine		6.6555	322.02	1.4774	0.5564		2.0552	0.282	1.206	3.716	4	0
204	116-29-0	Tetradifon		4.5381	356.05	2.552	0.7685		2.0534	0.406	0.734	3.779	4	0
205	97-18-7	Bithionol		5.5354	356.05	2.6472	0.6042		1.9823	0.333	1.013	3.782	4	0
206	458-37-7	Curcumin		2.8902	368.41	-0.7948	0.1121		1.6029	0.276	1.194	3.852	0	0
207	865-21-4	Vinblastine		1.6901	811.08	-1.9554	0.7977		1.2218	0.126	0.991	4.035	0	0.912208
208	5979-28-2	Pigment yellow 16		9.1573	726.48	2.1696	1.2235		1.2006	0.155	1.45	3.857	4	0
209	5567-15-7	C.I. Pigment Yellow 83		9.1002	818.54	1.7848	1.226		1.2171	0.138	1.36	3.867	4	0
210	304-28-9	2,7-Diacetylaminofluorene		4.3557	280.35	-0.7936	0.2383		1.5584	0.354	0.615	3.672	0	0
211	23214-92-8	Doxorubicin		4.3755	543.57	-4.4188	0.3427		1.4854	0.191	1.068	3.826	0	0
212	5522-43-0	1-Nitropyrene		3.228	247.26	0.6601	0.5136		1.6491	0.411	4.344	3.706	0	0.71463
213	3096-50-2	2-Acetylaminofluoren-9-one		4.0226	237.27	-0.8887	0.1547		1.6812	0.413	1.59	3.649	0	0

## Sheet: Table S14
Table S14. Experimental and predicted pTD50 values, hat values, standardized residuals, descriptor values of all training, test, and unknown external compounds of the male mouse QSAR model defined by Equation (4).
Modeling data set
NO.	CAS	Status	Experimental pTD50	Predicted pTD50	Pred. Residuals	Mw	ALogP	HAT i/i (h*=0.6667)	Std.residuals	CIC4	MATS4s	GATS7e	P_VSA_MR_7	B10[C-C]	VCH-6	maxwHBa	MM model	The range of the descriptors' values
1	26148-68-5	test	3.1766	3.6471	-0.4705	183.214	-0.5359	0.2722	0.1950	0	0.029	1.141	36.963	0	0.118363	2.07503		Descriptor	Minimum	Maximum
2	53-96-3	Training	4.9778	4.8015	0.1763	223.275	0.3845	0.2709	-0.1810	0.225	0.073	1.676	0	0	0.153896	2.16227		CIC4	0	2.225
3	81-49-2	test	2.9116	2.3416	0.57	381.023	0.5001	0.2722	0.1950	0.385	-0.06	0.651	0	0	0.061445	2.06226		MATS4s	-0.37	0.197
5	117-79-3	Training	2.4468	2.6915	-0.2447	223.231	-1.2775	0.1035	0.2267	0.538	-0.111	0.798	0	0	0.067459	1.75626		GATS7e	0	2.29
7	92-67-1	test	4.6363	4.8259	-0.1896	169.227	-0.7499	0.2722	0.1950	0.75	-0.129	1.854	0	0	0.0598528	2.08881		P_VSA_MR_7	0	195.743
8	3693-22-9	Training	4.5048	3.2344	1.2704	183.21	-0.904	0.2146	-1.2574	0.087	-0.145	0.537	0	0	0.11076	2.04227		B10[C-C]	0	1
9	103-33-3	Training	4.6751	3.6118	1.0633	182.226	0	0.1391	-1.0052	1.667	-0.189	0.284	33.326	0	0.06415	1.95986		VCH-6	0.03125	0.241782
10	119-53-9	Training	1.7754	2.1150	-0.3396	212.248	-0.8812	0.1007	0.3141	0.643	-0.059	0.518	0	0	0.06415	1.85041		maxwHBa	1.18651	3.99336
12	79520-77-7	Training	3.9928	3.0113	0.9815	442.552	0.6126	0.1827	-0.9522	1.47	-0.272	0.749	0	1	0.0561313	1.99493
14	2475-45-8	Training	2.7010	1.8083	0.8927	268.276	-3.5272	0.2970	-0.9339	2.125	0.136	0.65	0	0	0.0572917	1.49288
15	85-68-7	Training	1.1787	2.3973	-1.2186	312.365	-0.6837	0.1238	1.1419	0.669	-0.1	1.366	0	1	0.0598528	1.89576
17	510-15-6	Training	3.1411	3.5672	-0.4261	325.185	1.005	0.1164	0.3976	1.279	-0.194	0.279	78.297	0	0.0555556	1.94955
19	117-10-2	Training	3.0774	2.5396	0.5378	240.214	-1.4482	0.1201	-0.5029	0.846	0.034	1.295	0	0	0.0637375	1.50708
20	87-29-6	Training	1.9723	0.8145	1.1578	253.301	-0.3616	0.1740	-1.1174	0.434	0.08	0.905	18.952	1	0.0598528	1.97967
21	72-55-9	Training	4.4571	6.2358	-1.7787	318.018	2.669	0.2501	1.8016	1.909	-0.16	1.277	156.595	0	0.0520833	2.16773
22	50-29-3	Training	4.3735	4.0051	0.3684	354.476	3.1425	0.3973	-0.4162	1.527	0.065	0.356	195.743	0	0.0555556	2.39859
23	1163-19-5	test	1.9327	1.8226	0.1101	959.171	8.7339	0.2722	0.1950	1.652	0.15	0.839	0	0	0.03125	1.99246
25	33857-26-0	Training	2.0769	4.1071	-2.0302	253.078	1.1804	0.0743	1.8508	1	-0.143	0.792	78.297	0	0.0585292	2.09978
26	115-32-2	Training	4.0485	5.2036	-1.1551	367.91	2.4316	0.2745	1.1894	1.474	-0.181	0.464	195.743	0	0.0555556	2.19109
28	91-93-0	Training	1.3889	1.9060	-0.5171	296.282	-1.3732	0.1295	0.4861	1.28	-0.036	1.195	0	1	0.0481125	1.78783
29	57-41-0	Training	3.3374	3.3833	-0.0459	252.273	-1.0361	0.2264	0.0457	1.226	0.197	1.306	0	0	0.120916	1.8719
30	72-56-0	test	1.5256	1.2822	0.2434	307.258	1.7791	0.2722	0.1950	1.638	0.123	0.649	0	1	0.0555556	2.35516
31	324-93-6	Training	5.1968	5.1376	0.0592	187.216	-0.2702	0.4275	-0.0686	0.75	-0.114	2.29	0	0	0.0555556	1.91922
32	122-66-7	Training	2.2280	3.3524	-1.1244	184.242	-0.8408	0.1178	1.0501	1.615	-0.135	0.276	35.776	0	0.06415	2.00986
35	6471-49-4	Training	1.5089	2.2634	-0.7545	487.428	0.1733	0.1626	0.7232	0.278	-0.098	0.929	44.666	1	0.097654	1.7283
36	21340-68-1	Training	5.1659	4.5229	0.643	304.77	1.1955	0.2879	-0.6684	1.007	-0.37	1.278	39.149	1	0.0555556	2.15614
38	101-61-1	Training	2.6588	3.0693	-0.4105	254.377	0.8918	0.2202	0.4077	2.22	-0.126	0.785	0	1	0.0555556	2.20356
39	90-94-8	Training	2.7669	2.9101	-0.1432	268.36	0.1718	0.2267	0.1429	2.225	-0.05	1.134	0	1	0.0555556	1.95975
42	2243-62-1	Training	1.9844	1.7436	0.2408	158.204	-1.4998	0.1968	-0.2356	1.182	-0.089	0	0	0	0.0481125	1.97324
44	81-16-3	Training	-0.2299	1.0712	-1.3011	223.246	-1.2914	0.2243	1.2957	0.25	0.179	1.063	1.339	0	0.0486111	1.80049
46	156-10-5	Training	2.7657	2.7926	-0.0269	198.225	-0.4437	0.0786	0.0246	0.64	-0.078	0.738	19.284	0	0.0598528	1.97806
48	604-75-1	test	3.6459	3.7157	-0.0698	286.715	0.2344	0.2722	0.1950	0.258	-0.141	1.196	39.149	0	0.0561313	2.02705
49	101-80-4	test	2.9494	3.2854	-0.336	200.241	-1.6539	0.2722	0.1950	1.704	-0.223	0.32	0	0	0.0555556	1.82509
51	135-88-6	test	2.2107	1.6696	0.5411	219.287	-0.4204	0.2722	0.1950	0.467	-0.043	0.703	0	1	0.0839091	2.16898
52	842-07-9	Training	2.6263	2.1267	0.4996	248.285	-0.4603	0.1300	-0.4698	0.323	0.025	1.305	33.326	1	0.0806861	1.98245
53	50-33-9	Training	2.9413	2.9497	-0.0084	308.381	-1.6834	0.2225	0.0084	1.273	0.149	1.439	0	1	0.137	1.89612
54	117-39-5	Training	1.3014	0.8230	0.4784	302.238	-2.8012	0.1859	-0.4650	0.063	0.06	0.823	5.243	0	0.0576474	1.32097
55	50-55-5	Training	5.0472	5.0847	-0.0375	608.688	-0.8642	0.6045	0.0523	0.863	-0.051	0.97	0	1	0.241782	2.12157
56	83-79-4	Training	5.7133	5.4418	0.2715	399.423	0.1527	0.8268	-0.5722	0.554	-0.018	1.064	0	1	0.148456	3.99336
57	599-79-1	Training	2.1820	0.9986	1.1834	398.394	-1.6366	0.2398	-1.1905	0.238	-0.02	0.511	72.324	1	0.0766792	1.6882
59	1746-01-6	Training	9.5693	6.2358	3.3335	321.962	2.669	0.2501	-3.3764	1.909	-0.16	1.277	156.595	0	0.0520833	2.16773
61	139-65-1	Training	3.8139	3.7621	0.0518	216.302	-0.9092	0.1387	-0.0490	1.704	-0.14	0.675	0	0	0.0555556	2.14196
62	76-87-9	test	3.5155	3.2363	0.2792	367.035	-0.4603	0.2722	0.1950	2.12	-0.009	0.19	0	0	0.096225	2.06905
65	128-66-5	Training	1.5866	3.0213	-1.4347	332.358	-0.5276	0.1192	1.3408	1.105	-0.057	0.87	0	1	0.128472	1.98815
66	50594-66-6	test	3.3851	2.7072	0.6779	361.657	2.1086	0.2722	0.1950	0.218	-0.325	0.626	44.819	0	0.0481125	1.18651
69	2425-85-6	Training	1.2347	1.4471	-0.2124	307.309	0.8418	0.1452	0.2015	0.243	0.021	1.016	38.996	1	0.0726674	1.89099
Unknown external set (129)				Predicted pTD50		MW	ALOGP	HAT i/i (h*=0.6667)		CIC4	MATS4s	GATS7e	P_VSA_MR_7	B10[C-C]	VCH-6	maxwHBa
4	82-28-0	1-amino-2-methylanthracene-9,10-dione		2.464		237.27	-0.6355	0.0882		0.509	-0.045	0.919	0	0	0.0642361	1.77111
6	97-56-3	(E)-2-methyl-4-(o-tolyldiazenyl)aniline		3.889		225.32	0.5341	0.306		0.36	-0.349	0.622	33.326	0	0.051834	2.01645
11	120-32-1	2-benzyl-4-chlorophenol		4.4396		218.69	0.7402	0.2039		0.385	-0.165	1.465	39.149	0	0.0561313	2.10279
13	80-05-7	4,4'-(propane-2,2-diyl)diphenol		6.7444		228.31	-0.0064	0.8593		1.743	-0.084	2.971	0	0	0.0555556	1.91884
16	101-79-1	4-(4-chlorophenoxy)aniline		3.709		219.68	-0.1597	0.2026		0.72	-0.29	0.406	39.149	0	0.0555556	2.09317
18	10473-70-8	1-(4-chlorophenyl)-1-phenylprop-2-yn-1-yl hydrogen carbonimidate		7.4092		285.74	1.6935	3.3691		0.5	-0.02	0.935	56.179	0	0.0598528	5.6856
24	262-12-4	dibenzo[b,e][1,4]dioxine		4.0252		184.2	-0.3082	0.3559		1.909	-0.343	0.089	0	0	0.0659722	1.92671
27	5803-51-0	(E)-4-(2,5-dimethoxystyryl)aniline		3.754		255.34	-0.3857	0.2496		0.709	-0.204	1.765	18.952	1	0.051834	2.01065
33	53-95-2	N-(9H-fluoren-2-yl)-N-hydroxyacetamide		5.1093		239.29	-0.629	0.2797		0.218	-0.111	1.279	0	0	0.153896	2.10783
34	129-43-1	1-hydroxyanthracene-9,10-dione		1.894		224.22	-0.9879	0.0999		0.43	-0.015	0.693	0	0	0.067459	1.72004
37	101-14-4	4,4'-methylenebis(2-chloroaniline)		5.0237		267.17	0.445	0.1387		1.103	-0.168	1.273	78.297	0	0.0481125	2.22596
40	3771-19-5	2-methyl-2-(4-(1,2,3,4-tetrahydronaphthalen-1-yl)phenoxy)propanoic acid		3.6552		310.42	0.0993	0.1274		0.745	-0.198	1.029	0	1	0.106587	2.21936
41	91-20-3	naphthalene		3.0509		128.18	0	0.2534		1.889	-0.18	0	0	0	0.0555556	2.12037
43	91-59-8	naphthalen-2-amine		3.011		143.2	-0.7499	0.1582		0.4	-0.023	1.306	0	0	0.051834	2.07815
45	86-30-6	N,N-diphenylnitrous amide		2.5802		198.24	-0.1138	0.1205		1.52	0.076	0.732	19.161	0	0.06415	1.90027
47	303-47-9	(S)-2-(((Z)-((R)-5-chloro-8-hydroxy-3-methyl-1-oxoisochroman-7-yl)(hydroxy)methylene)amino)-3-phenylpropanoic acid		2.079		403.84	-0.1599	0.153		0.364	0.013	1.418	39.149	1	0.0709505	1.81792
50	77-09-8	3,3-bis(4-hydroxyphenyl)isobenzofuran-1(3H)-one		4.7732		318.34	-1.2966	0.2386		1.053	-0.088	0.993	0	0	0.148728	1.86106
58	10048-13-2	(3aR,12cS)-8-hydroxy-6-methoxy-3a,12c-dihydro-7H-furo[3',2':4,5]furo[2,3-c]xanthen-7-one		2.3098		324.3	-1.4653	0.4083		0.132	0.318	0.987	9.476	0	0.166238	1.87011
60	96-69-5	4,4'-thiobis(2-(tert-butyl)-5-methylphenol)		1.2428		358.59	4.0664	0.4729		2.365	0.122	0.53	0	1	0.0416667	2.22731
63	2832-40-8	(Z)-N-(4-((E)-(2-hydroxy-5-methylphenyl)diazenyl)phenyl)acetimidic acid		0.7361		269.33	0.11	0.1628		0.5	-0.011	0.652	33.326	1	0.051834	1.80394
64	6358-85-6	(1Z,1'Z)-2,2'-((1E,1'E)-(3,3'-dichloro-[1,1'-biphenyl]-4,4'-diyl)bis(diazene-2,1-diyl))bis(3-oxo-N-phenylbutanimidic acid)		2.906		629.54	0.5034	0.6156		1.364	0.296	1.257	144.949	1	0.112263	2.03023
67	129-15-7	2-methyl-1-nitroanthracene-9,10-dione		3.1172		267.25	0.7745	0.1233		0.509	-0.105	1.187	5.67	0	0.0642361	1.6643
68	602-87-9	5-nitro-1,2-dihydroacenaphthylene		10.9202		199.22	0.7849	3.1749		0.5	-0.016	5.338	5.67	0	0.148308	2.05809
108	4075-79-0	4-acetylaminobiphenyl		0.7712		211.28	-0.6249	0.1713		0.716	0.065	0.73	0	1	0.0598528	2.06291
109	28314-03-6	1-Acetylaminofluorene		3.9282		223.29	-0.1687	0.193		0.292	0.029	0.972	0	0	0.150478	2.14571
110	28322-02-3	4-Acetylaminofluorene		4.8635		223.29	-0.1687	0.2635		0.292	0.063	1.701	0	0	0.150478	2.14571
111	3693-22-9	2-Dibenzofuranamine		3.2344		183.22	-0.904	0.2146		0.087	-0.145	0.537	0	0	0.11076	2.04227
112	84-65-1	9,10-Anthracenedione		2.6434		208.22	-0.5276	0.2162		1.833	-0.11	0.097	0	0	0.0711806	1.77574
113	68844-77-9	Astemizole		4.0796		458.63	-0.2905	0.445		0.719	-0.055	0.547	34.796	1	0.206928	2.15154
114	64896-26-0	Benzalazine		1.4848		208.28	-0.0684	0.1889		1.571	0.081	0.755	18.095	1	0.06415	1.98764
115	92-87-5	Benzidine		5.6259		184.26	-1.4998	0.3522		1.769	-0.151	1.931	0	0	0.0555556	2.00085
116	50-32-8	Benzo(a)pyrene		4.0658		252.32	0	0.121		0.649	-0.02	1.033	0	0	0.111543	2.30907
117	120-78-5	Dibenzothiazyl disulfide		8.5952		332.52	2.3624	1.8859		1	-0.147	1.183	33.571	1	0.358816	2.34107
118	92-52-4	Biphenyl		3.6877		154.22	0	0.13		1.727	-0.034	0.906	0	0	0.06415	2.12037
119	145040-37-5	Candesartan cilexetil		5.0203		610.73	-0.8455	0.7267		0.576	0.044	1.04	66.652	1	0.247672	2.02214
120	63-25-2	Carbaryl		3.6443		201.24	0.2352	0.2284		0.337	-0.24	1.06	0	0	0.051834	1.98842
121	86-74-8	Carbazole		3.8136		167.22	-0.4204	0.2079		0.909	-0.123	0.328	0	0	0.127724	2.14699
122	80-33-1	Chlorfenson		3.4308		303.17	1.0958	0.2083		0.769	-0.264	0.177	86.047	0	0.0555556	1.9085
123	2227-13-6	Sulfide, p-chlorophenyl 2,4,5-trichlorophenyl		5.6114		324.05	3.5678	0.3836		0.348	-0.163	1.318	156.595	0	0.0486111	2.5833
124	94-20-2	Chlorpropamide		0.7489		276.77	-0.5337	0.3077		0.625	0.138	1.341	44.956	1	0.0277778	1.78882
125	22494-47-9	Clobuzarit		3.6541		304.79	0.9561	0.1788		0.934	-0.285	1.042	39.149	1	0.0555556	2.15776
126	477-30-5	Demecolcine		0.9183		371.47	-0.6064	0.225		0.808	0.006	0.921	33.672	1	0.0180422	1.98695
127	65765-07-3	3-Hydroxyproquazone		2.541		294.38	-0.6343	0.1076		0.557	0.041	1.064	0	0	0.064334	2.00541
128	80-08-0	Dapsone		4.6655		248.33	-1.925	0.2545		1.655	-0.182	1.531	6.046	0	0.0555556	1.59674
129	53-19-0	Mitotane		4.0234		320.04	2.6539	0.1284		0.751	-0.047	1.006	78.297	0	0.0555556	2.38169
130	52918-63-5	Deltamethrin		11.2613		505.22	1.9373	7.8058		0.644	0.046	0.513	9.476	1	0.66035	2.32055
131	131-01-1	Deserpidine		5.1084		578.72	-0.8124	0.6092		0.725	-0.049	0.972	0	1	0.245504	2.17829
132	63019-65-8	N-1-Diacetamidofluorene		2.8419		265.33	-0.2823	0.2799		0.729	0.224	0.782	0	0	0.150478	2.08828
133	538-41-0	4,4'-Diaminoazobenzene		4.5363		212.28	-1.4998	0.1686		1.714	-0.261	0.822	33.326	0	0.0555556	1.81561
134	785-30-8	4,4'-Diaminobenzanilide		2.7489		227.29	-2.1346	0.0815		0.867	-0.08	0.923	0	0	0.0555556	1.7545
135	439-14-5	Diazepam		4.5612		284.76	-0.0956	0.2099		0.447	-0.136	1.567	39.149	0	0.0561313	2.16622
136	53-70-3	Dibenz(a,h)anthracene		4.1655		278.36	0	0.1234		1.375	-0.137	1.058	0	1	0.118056	2.33278
137	4106-66-5	3-Aminodibenzofuran		2.2778		183.22	-0.904	0.1644		0.087	0.079	0.688	0	0	0.11076	2.05293
138	117-80-6	2,3-Dichlor-1,4-naphthochinon		5.9078		227.04	0.6776	0.7073		1	-0.008	2.798	85.299	0	0.0434028	1.80727
139	91-94-1	3,3'-Dichlorobenzidine		6.0817		253.14	-0.0112	0.2813		1.154	-0.297	1.517	78.297	0	0.0481125	2.18839
140	97-16-5	2,4-Dichlorophenyl benzenesulfonate		3.5547		303.17	1.0958	0.2031		0.385	-0.236	0.419	86.047	0	0.0561313	2.05388
141	56-53-1	Diethylstilbestrol		3.717		268.38	-0.2302	0.123		1.738	-0.109	0.888	0	0	0.0555556	1.94865
142	21626-89-1	Diftalone		4.1299		264.3	-1.2464	0.1089		1.125	-0.129	1.017	0	0	0.0909109	1.90115
143	65176-75-2	5,6-Dimethoxysterigmatocystin		1.1762		384.36	-1.5689	0.4365		0.648	0.335	0.959	9.476	1	0.160224	1.84017
144	60-11-7	4-(Dimethylamino)azobenzene		3.5821		225.32	0.2178	0.1335		1.11	-0.171	1.395	33.326	1	0.0598528	2.02713
145	57-97-6	7,12-Dimethylbenz(a)anthracene		4.1213		256.36	1.284	0.1138		0.875	-0.119	0.866	0	0	0.0920139	2.27028
146	74-31-7	p-Phenylenediamine, N,N'-diphenyl-		2.5412		260.36	-0.8408	0.1391		1.667	-0.061	0.626	0	1	0.0919278	2.06773
147	86-29-3	Diphenylacetonitrile		3.1206		193.26	-0.11	0.2642		1.462	0.154	1.153	0	0	0.06415	2.33463
148	102-09-0	Diphenyl carbonate		1.3834		214.23	0.4597	0.1716		1.538	0.069	0.875	0	1	0.06415	1.84265
149	40762-15-0	Doxefazepam		3.1144		348.78	-0.2762	0.1625		0.105	-0.113	1.133	39.149	0	0.051834	1.88536
150	476-66-4	Ellagic acid		3.8887		302.2	-2.0234	0.5207		1	-0.293	1.404	0	0	0.0615999	0.964564
151	29975-16-4	Estazolam		4.7224		294.76	0.4393	0.1716		0.313	-0.057	1.412	72.475	0	0.0872986	2.24955
152	22966-79-6	Estradiol mustard		8.851		788.74	3.4345	2.76		1.262	0.033	0.863	156.595	1	0.393783	2.23664
153	842-00-2	4-Ethylsulfonylnaphthalene-1-sulfonamide		2.6303		299.4	-1.009	0.1442		0.586	-0.189	0.656	11.853	0	0.0486111	1.69684
154	51630-58-1	Fenvalerate		1.3622		419.93	0.8049	0.1623		0.697	0.048	0.505	39.149	1	0.0876306	2.10265
155	363-17-7	Acetamide, N-fluoren-2-yl-2,2,2-trifluoro-		4.731		277.26	0.9195	0.2617		0.225	0.02	1.579	0	0	0.153896	1.98939
156	398-32-3	4'-Fluoro-4-biphenylacetamide		2.9478		229.27	-0.1203	0.1179		0.69	0.006	1.329	0	0	0.0555556	1.89436
157	93957-54-1	Fluvastatin		1.4755		411.51	-0.5015	0.2164		0.527	0.139	0.629	18.952	1	0.134081	2.02057
158	517-28-2	Hematoxylin		5.1844		302.3	-2.4092	0.6012		0.299	-0.045	1.343	0	0	0.205847	1.58154
159	70-30-4	Hexachlorophene		6.1707		406.89	4.0014	0.4961		0.963	-0.27	1.012	234.892	0	0.0360844	2.21504
160	103-16-2	Monobenzone		2.9957		200.25	-0.6028	0.1128		0.667	-0.14	0.719	0	0	0.0598528	2.0143
161	4463-22-3	N-Hydroxy-4-acetylaminobiphenyl		1.8677		227.28	-1.0852	0.1192		0.692	-0.141	0.777	0	1	0.0598528	2.01061
162	4363-03-5	3-Hydroxy-4-aminobiphenyl		4.4938		185.24	-1.2102	0.2912		0.4	-0.201	1.67	0	0	0.0561313	1.99104
163	53-86-1	Indomethacin		2.8112		357.81	0.2922	0.2101		0.476	-0.061	0.631	39.149	1	0.145799	1.95707
164	101-73-5	4-Isopropoxydiphenylamine		1.2772		227.33	-0.5223	0.1272		0.986	-0.012	0.68	0	1	0.0598528	2.04021
165	520-18-3	Kaempferol		0.594		286.25	-2.3409	0.1918		0.323	0.163	0.76	5.243	0	0.0613689	1.46013
166	22071-15-4	Ketoprofen		3.0496		254.3	-0.2088	0.1406		0.47	-0.172	0.866	0	0	0.0598528	1.84693
167	50264-69-2	Lonidamine		4.0629		321.17	1.2736	0.2047		0.065	0.001	0.897	94.96	0	0.110879	2.26954
168	67-98-1	Ethamoxytriphetol		1.839		419.61	0.1119	0.0939		1.035	-0.022	0.708	0	1	0.0876306	1.99746
169	80830-39-3	3-Methoxy-4-aminoazobenzene		2.4482		227.29	-0.8017	0.173		0.492	-0.228	0.863	33.326	1	0.0561313	1.93578
170	3544-23-8	2-Methoxy-4-aminoazobenzene		2.2848		227.29	-0.8017	0.1075		0.492	0.06	0.959	33.326	0	0.0561313	1.93335
171	5834-17-3	2-Methoxy-3-dibenzofuranamine		4.8334		213.25	-0.9558	0.2433		0.25	-0.104	1.696	0	0	0.107537	2.0246
172	72-43-5	Methoxychlor		2.1972		345.66	1.5503	0.3162		1.674	0.05	0.423	117.446	1	0.0555556	2.23029
173	55-80-1	3-Methyl-4'-(dimethylamino)azobenzene		2.8085		239.35	0.8598	0.1219		0.865	-0.073	1.383	33.326	1	0.0555556	2.04652
174	11013-97-1	Methyl hesperidin		1.6157		624.65	-4.4515	0.1344		0.503	0.046	0.929	0	1	0.118101	1.71477
175	16699-10-8	4-(4-N-Methyl-N-nitrosaminostyryl)quinoline		2.107		289.36	0.4563	0.1678		0.345	-0.146	0.57	54.899	1	0.0741895	2.07015
176	56-49-5	3-Methylcholanthrene		5.0247		268.37	0.7668	0.3235		0.345	-0.192	1.156	0	1	0.181237	2.39361
177	838-88-0	4,4'-Methylene bis(2-methylaniline)		4.0418		226.35	0.2404	0.1907		1.357	-0.267	0.664	0	0	0.0481125	2.1399
178	119-47-1	p-Cresol, 2,2'-methylenebis(6-tert- butyl-		1.4397		340.55	3.932	0.3495		2.317	0.041	0.535	0	1	0.0416667	2.05111
179	90-12-0	1-Methylnaphthalene		1.8394		142.21	0.642	0.2743		0.417	-0.158	0	0	0	0.051834	2.15741
180	5800-19-1	Metiapine		2.1545		323.5	0.9179	0.1261		0.671	0.033	0.829	0	1	0.101834	2.3708
181	86-86-2	2-(1-Naphthyl)acetamide		3.9339		185.24	-0.6	0.4416		0.32	0.067	2.3	0	0	0.051834	2.02761
182	86-87-3	alpha-Naphthylacetic acid		4.7685		186.22	-0.205	0.7403		0.25	0.06	2.885	0	0	0.051834	1.98679
183	93-46-9	p-Phenylenediamine, N,N'-(di-2-naphthyl)-		3.6907		360.48	-0.8408	0.141		1.417	-0.091	0.859	0	1	0.131446	2.17716
184	86-88-4	1-(1-Naphthyl)-2-thiourea		2.6593		202.3	0.2714	0.2258		0.25	0.076	1.474	0	0	0.051834	2.10401
185	51715-17-4	N-Nitrosochlordiazepoxide		3.2717		328.78	0.3019	0.1051		0.41	-0.051	1.059	58.31	0	0.0561313	2.00658
186	27753-52-2	Nonabromobiphenyl		3.3388		864.23	7.9992	0.4025		0.489	-0.045	1.06	0	0	0.0336672	2.78027
187	94-36-0	Benzoyl peroxide		3.5823		242.24	-0.1822	0.1959		1.571	-0.184	1.465	0	1	0.06415	1.77059
188	3096-50-2	2-Acetylaminofluoren-9-one		3.2468		237.27	-0.8887	0.1719		0.233	0.011	0.806	0	0	0.136761	1.94161
189	92-84-2	Phenothiazine		3.5893		199.29	0.1702	0.1624		0.87	-0.152	0.383	0	0	0.0938288	2.27349
190	71835-85-3	Phenylethyl 3-methylcaffeate		2.2502		298.36	0.0251	0.1395		0.419	-0.147	1.087	18.952	1	0.0561313	1.99246
191	90-43-7	2-Phenylphenol		2.1105		170.22	-0.4603	0.1096		0.468	-0.011	0.713	0	0	0.0598528	1.9812
192	92-69-3	4-Hydroxybiphenyl		5.27		170.22	-0.4603	0.4161		0.696	-0.113	2.257	0	0	0.0598528	2.048
193	2955-38-6	Prazepam		4.1606		324.83	0.0188	0.1559		0.55	-0.066	1.232	39.149	1	0.147418	2.22515
194	54-80-8	Pronetalol		1.5754		229.35	-0.8673	0.1263		0.709	-0.04	0.967	0	1	0.051834	2.08121
195	22760-18-5	Proquazone		3.1819		278.38	-0.174	0.1497		0.776	0.081	1.426	0	0	0.0686313	2.06111
196	1508-45-8	Mitopodozide		2.2658		474.56	-2.0191	0.0946		0.801	-0.063	0.928	0	1	0.103465	1.80145
197	81-54-9	Purpurin		2.2349		256.22	-1.9085	0.1103		0.444	0.011	1.158	0	0	0.061445	1.6035
198	13292-46-1	Rifampin		3.3536		823.05	-0.5731	0.263		0.629	-0.034	1.09	46.952	1	0.153114	1.68793
199	77-46-3	Acedapsone		1.314		332.41	-0.5686	0.2072		1.628	-0.116	0.43	6.046	1	0.0555556	1.55131
200	27470-51-5	Suxibuzone		3.5996		438.52	-2.3514	0.1826		1.047	-0.056	1.229	0	1	0.144918	1.81279
201	569-57-3	Chlorotrianisene		3.3751		380.89	0.4855	0.1574		1.881	-0.16	0.539	42.649	1	0.0833333	2.12543
202	846-50-4	Temazepam		4.0846		300.76	-0.2165	0.1674		0.375	-0.145	1.34	39.149	0	0.0561313	2.06178
203	15721-02-5	2,2',5,5'-Tetrachlorobenzidine		5.181		322.02	1.4774	0.2005		1.154	-0.169	0.921	156.595	0	0.0416667	2.31333
204	116-29-0	Tetradifon		5.0199		356.05	2.552	0.3255		0.4	-0.244	0.921	162.641	0	0.0486111	2.15841
205	97-18-7	Bithionol		5.478		356.05	2.6472	0.2493		0.96	-0.206	1.172	156.595	0	0.0416667	2.1919
206	458-37-7	Curcumin		0.9276		368.41	-0.7948	0.1677		1.181	0.018	0.709	37.905	1	0.0481125	1.62655
207	865-21-4	Vinblastine		9.465		811.08	-1.9554	4.0744		0.524	-0.029	1.093	18.952	1	0.497143	2.10464
208	5979-28-2	Pigment yellow 16		3.0387		726.48	2.1696	0.8344		1.25	0.242	0.9	223.247	1	0.096225	2.10517
209	5567-15-7	C.I. Pigment Yellow 83		3.7687		818.54	1.7848	0.7966		1.471	0.203	1.279	223.247	1	0.0897792	2.01309
210	304-28-9	2,7-Diacetylaminofluorene		3.6124		280.35	-0.7936	0.1991		1.23	0.088	1.424	0	1	0.150175	2.03226
211	23214-92-8	Doxorubicin		1.8017		543.57	-4.4188	0.1922		0.316	-0.012	1.044	0	1	0.123466	1.49851
212	5522-43-0	1-Nitropyrene		4.9978		247.26	0.6601	0.3104		0.527	-0.026	2.118	5.67	0	0.0865563	2.06542
213	3096-50-2	2-Acetylaminofluoren-9-one		3.2468		237.27	-0.8887	0.1719		0.233	0.011	0.806	0	0	0.136761	1.94161

[truncated: 5 more sheets: Table S15, Table S16, Table S17, Table S18, Table S19]
