# Supplementary material for: Systematic QSAR and iQCCR modelling of fused/non-fused aromatic hydrocarbons (FNFAHs) carcinogenicity to rodents: reducing unnecessary chemical synthesis and animal testing
Source: Royal Society of Chemistry journal article supplement (doi:10.1039/d2gc00986b), 2022-01-01
Supplement: d2gc00986b3.xlsx [file d2gc00986b3.xlsx]

## Sheet: Table of Contents
All Supplementary Tables are presented in Corresponding Excel Sheets
Electronic Supplementary Information-3
Systematic QSAR and iQCCR Modelling of Fused/Non-Fused Aromatic Hydrocarbons (FNFAHs) Carcinogenicity to Rodents: Reduce Unnecessary Chemical Synthesis and Animal Testing
Feifan Lia, Tengjiao Fana,b, Guohui Suna,*, Lijiao Zhaoa, Rugang Zhonga, Yongzhen Pengc
aBeijing Key Laboratory of Environmental and Viral Oncology, Faculty of Environment and Life, Beijing University of Technology, Beijing 100124, P. R. China bDepartment of Medical Technology, Beijing Pharmaceutical University of Staff and Workers, Beijing 100079, China cNational Engineering Laboratory for Advanced Municipal Wastewater Treatment and Reuse Technology, Faculty of Environment and Life…
*Corresponding author: Guohui Sun; E-mail address: sunguohui@bjut.edu.cn (G.S); Tel.: +86-10-67391917
Content of Sheets
Table S1. Detailed results of the prediction quality for each compound in the test set of the female rat QSAR model defined by Equation (1).
Table S2. Detailed results of the prediction quality for each unknown external compound in the female rat QSAR model defined by Equation (1).
Table S3. Detailed results of the prediction quality for each compound in the test set of the male rat QSAR model defined by Equation (2).
Table S4. Detailed results of the prediction quality for each unknown external compound in the male rat QSAR model defined by Equation (2).
Table S5. Detailed results of the prediction quality for each compound in the test set of the female mouse QSAR model defined by Equation (3).
Table S6. Detailed results of the prediction quality for each unknown external compound in the female mouse QSAR model defined by Equation (3).
Table S7. Detailed results of the prediction quality for each compound in the test set of the male mouse QSAR model defined by Equation (4).
Table S8. Detailed results of the prediction quality for each unknown external compound in the male mouse QSAR model defined by Equation (4).
Table S9. Detailed results of the prediction quality for each compound in the test set of the rat QSAR model defined by Equation (5).
Table S10. Detailed results of the prediction quality for unknown true external compound in the rat QSAR model defined by Equation (5).
Table S11. Detailed results of the prediction quality for each compound in the test set of the mouse QSAR model defined by Equation (6).
Table S12. Detailed results of the prediction quality for each unknown external compound in the mouse QSAR model defined by Equation (6).
Table S13. Detailed results of the prediction quality for each compound in the test set of the rat-mouse iQCCR model defined by Equation (7).
Table S14. Detailed results of the prediction quality for each unknown external compound in the rat-mouse iQCCR model defined by Equation (7).
Table S15. Detailed results of the prediction quality for each compound in the test set of the mouse-rat iQCCR model defined by Equation (8).
Table S16. Detailed results of the prediction quality for each unknown external compound in the mouse-rat iQCCR model defined by Equation (8).

## Sheet: Table S1-S2
Table S1. Detailed results of the prediction quality for each compound in the test set of the female rat QSAR model defined by Equation (1).
TestCompNo	Score(MAE-LOO)	Score(Proximity Train YObs Mean)	Score(Similarity based AD)	CompositeScore	Prediction Quality	Yobs(Test)	YPred(Test)	AbsPredictionError	Score(AbsPredictionError)	AD status	YObs(Test) Distribution	Closest Training Compound	Euclidean Distance	Generalized Jaccard Coeff.
2	2	3	3	3	Good	5.1641	5.50046	0.336356	3	In	Between +1SD and +2SD	67	0.446969	0.730822
28	2	3	3	3	Good	1.2387	1.19542	0.0432789	3	In	Between -1SD and -2SD	63	0.148758	0.862358
33	2	3	3	3	Good	5.1383	5.97764	0.839337	3	In	Between +1SD and +2SD	4	0.417238	0.758635
42	2	3	3	3	Good	2.8263	3.7199	0.893604	3	In	Between +1SD and -1SD	37	0.275299	0.583905
57	3	3	2	3	Good	1.6678	1.75729	0.0894943	3	In	Between +1SD and -1SD	54	0.289772	0.756178
60	2	3	3	3	Good	1.9536	2.18493	0.231329	3	In	Between +1SD and -1SD	30	0.0839494	0.886291
61	2	3	3	3	Good	3.7118	3.43909	0.272711	3	In	Between +1SD and -1SD	16	0.359905	0.589217
69	2	3	3	3	Good	1.7682	1.98986	0.22166	3	In	Between +1SD and -1SD	63	0.244973	0.784157
Best Weightage found :
To Score MAE(Loo)	0.5
To Score (AD)	0.5
To Score (Mean)	0
Correct Score Prediction(%) : 100
Internal validation metrics:
R^2	0.81697
Q^2(LOO)	0.69297
Avg Rm^2	0.60299
Delta Rm^2	0.09499
MAE (100% data)	0.8227
MAE (95% data)	0.73259
External validation metrics:
Q2F1 (or R2pred)	0.89717
Q2F2	0.89545
Q2F3	0.92632
Avg Rm^2 (Test)	0.9297
Delta Rm^2 (Test)	0.0329
CCC (test)	0.95473
MAE (100% Test data)	0.36597
MAE (95% Test data)	0
Table S2. Detailed results of the prediction quality for each unknown external compound in the female rat QSAR model defined by Equation (1).
TestCompNo	Score(MAE-LOO)	Score(Proximity Train YObs Mean)	Score(Similarity based AD)	CompositeScore	PredictionQuality	YPred(Test)	AD status	Closest Training Compound	Euclidean Distance	Generalized Jaccard Coeff.
1	2	3	3	3	Good	6.48196	In	59	0.390712	0.755447
5	2	3	3	3	Good	3.13371	In	24	0.177339	0.741003
7	3	3	3	3	Good	3.39018	In	46	0.11281	0.863541
8	2	3	3	3	Good	4.08967	In	3	0.16859	0.821562
10	2	3	3	3	Good	3.53007	In	37	0.0905496	0.836379
11	2	3	3	3	Good	4.58899	In	37	0.273925	0.713346
12	2	3	3	3	Good	3.59328	In	6	0.115187	0.876566
14	2	3	3	3	Good	2.63101	In	3	0.215464	0.769333
17	2	3	3	3	Good	1.85904	In	40	0.105092	0.841304
18	2	3	3	3	Good	2.0719	In	29	0.182898	0.566229
19	2	3	3	3	Good	3.44152	In	24	0.213378	0.705782
20	3	3	3	3	Good	3.06025	In	37	0.135317	0.762516
21	2	3	3	3	Good	0.813139	In	23	0.298727	0.640698
22	2	3	3	3	Good	0.901932	In	29	0.0797279	0.738852
25	3	2	3	3	Good	6.93935	In	3	0.284704	0.741208
26	2	3	3	3	Good	2.21362	In	29	0.110023	0.728394
27	2	3	3	3	Good	2.76001	In	6	0.175399	0.811975
31	3	3	3	3	Good	4.48108	In	32	0.100769	0.878588
34	2	3	3	3	Good	2.76578	In	24	0.135668	0.801564
35	2	3	1	2	Moderate	1.36589	Outside AD	39	0.706608	0.616512
36	2	3	3	3	Good	3.75835	In	39	0.232313	0.753731
41	2	3	3	3	Good	6.41856	In	32	0.41254	0.60342
43	3	3	3	3	Good	3.61674	In	23	0.188305	0.766182
44	2	3	3	3	Good	1.7327	In	54	0.365843	0.580891
45	2	3	3	3	Good	0.894997	In	23	0.243726	0.660593
47	2	3	3	3	Good	2.08095	In	15	0.135734	0.855113
48	2	3	3	3	Good	2.48211	In	46	0.0976604	0.902193
50	2	3	3	3	Good	1.73124	In	29	0.205446	0.468318
51	3	3	3	3	Good	4.14875	In	32	0.204503	0.766245
53	2	3	3	3	Good	0.0944886	In	63	0.243619	0.802048
55	1	1	1	1	Bad/Unreliable	22.1806	Outside AD	24	2.77771	0.168533
56	1	1	1	1	Bad/Unreliable	21.9357	Outside AD	24	2.78325	0.15271
58	1	1	1	1	Bad/Unreliable	17.2184	Outside AD	24	2.23535	0.208752
62	2	3	3	3	Good	3.12793	In	37	0.0950112	0.782109
65	1	1	1	1	Bad/Unreliable	61.0857	Outside AD	24	9.28407	0.0753918
68	2	3	2	2	Moderate	6.08547	In	32	0.49812	0.584347
108	2	3	3	3	Good	1.65062	In	64	0.0837708	0.904293
109	2	3	3	3	Good	4.59508	In	4	0.217188	0.842002
110	2	3	3	3	Good	4.28104	In	67	0.293652	0.793481
111	2	3	3	3	Good	4.08967	In	3	0.16859	0.821562
112	2	3	3	3	Good	2.3242	In	24	0.0992187	0.822165
113	2	3	3	3	Good	3.38839	In	13	0.200252	0.748695
114	2	3	3	3	Good	4.08892	In	32	0.0978712	0.901613
115	2	3	3	3	Good	3.89671	In	16	0.0726846	0.923735
116	1	1	1	1	Bad/Unreliable	31.6244	Outside AD	24	4.37786	0.141155
117	2	3	3	3	Good	0.680128	In	29	0.158253	0.46508
118	3	3	3	3	Good	2.72731	In	23	0.0844144	0.871637
119	2	3	3	3	Good	0.963767	In	63	0.0804158	0.921155
120	2	3	3	3	Good	0.943222	In	15	0.207494	0.754814
121	2	3	3	3	Good	5.50879	In	24	0.32381	0.623401
122	2	3	3	3	Good	2.34824	In	46	0.0631374	0.917575
123	2	3	2	2	Moderate	6.16899	In	16	0.443173	0.589873
124	2	3	3	3	Good	2.23412	In	15	0.0899213	0.894425
125	2	3	3	3	Good	2.59377	In	15	0.226028	0.794816
126	2	3	3	3	Good	3.0312	In	67	0.108179	0.907451
127	2	2	3	3	Good	-1.27473	In	63	0.33444	0.691109
128	2	3	3	3	Good	1.7887	In	46	0.205352	0.763348
129	2	3	3	3	Good	3.24362	In	37	0.228773	0.582744
130	2	3	3	3	Good	-0.356369	In	15	0.23657	0.776541
131	1	1	1	1	Bad/Unreliable	22.0109	Outside AD	24	2.77551	0.169402
132	2	3	3	3	Good	4.35948	In	67	0.326968	0.792785
133	3	3	3	3	Good	4.07312	In	49	0.112583	0.888861
134	3	3	3	3	Good	3.56941	In	49	0.0882042	0.915774
135	2	3	3	3	Good	2.57246	In	39	0.155665	0.850898
136	1	1	1	1	Bad/Unreliable	22.9809	Outside AD	24	2.77928	0.183126
137	2	3	3	3	Good	3.67929	In	24	0.145214	0.802002
138	2	2	2	2	Moderate	-2.22726	In	29	0.504823	-0.30526
139	2	3	3	3	Good	3.33986	In	16	0.0854309	0.915739
140	2	3	3	3	Good	2.25061	In	52	0.213738	0.750219
141	2	3	3	3	Good	0.573501	In	63	0.229203	0.796547
142	2	1	1	2	Moderate	13.2585	Outside AD	24	1.19424	0.303075
143	1	1	1	1	Bad/Unreliable	16.7812	Outside AD	24	2.2351	0.207938
144	2	3	3	3	Good	3.32123	In	6	0.0973081	0.923693
145	2	1	1	2	Moderate	9.70516	Outside AD	24	1.25978	0.277732
146	3	3	3	3	Good	2.385	In	66	0.0997404	0.912151
147	2	3	3	3	Good	2.86325	In	37	0.177193	0.641117
148	2	3	3	3	Good	2.62633	In	52	0.176276	0.801283
149	2	3	3	3	Good	2.7232	In	52	0.133554	0.861122
150	2	1	1	2	Moderate	10.849	Outside AD	3	1.21831	0.440825
151	2	2	3	3	Good	6.89881	In	59	0.319669	0.765049
152	1	1	1	1	Bad/Unreliable	13.1731	Outside AD	24	1.36734	0.197873
153	2	3	3	3	Good	0.701499	In	63	0.111615	0.892691
154	2	3	3	3	Good	1.2421	In	15	0.209468	0.805578
155	3	2	3	3	Good	8.18271	In	59	0.143447	0.893037
156	3	3	3	3	Good	4.15036	In	32	0.152766	0.842616
157	2	3	3	3	Good	-0.0827307	In	63	0.24709	0.76363
158	1	1	1	1	Bad/Unreliable	13.1729	Outside AD	24	1.1683	0.267109
159	2	3	3	3	Good	5.65387	In	37	0.337821	0.660747
160	2	3	3	3	Good	5.81422	In	32	0.289637	0.730531
161	2	3	3	3	Good	2.27771	In	64	0.0703304	0.941774
162	2	3	3	3	Good	3.49255	In	16	0.0737121	0.935502
163	2	3	3	3	Good	1.4282	In	63	0.207448	0.841926
164	2	3	3	3	Good	0.919975	In	15	0.18251	0.831932
165	3	3	3	3	Good	0.83931	In	54	0.111839	0.852182
166	2	3	3	3	Good	1.75314	In	15	0.149426	0.840487
167	3	3	3	3	Good	4.05964	In	32	0.138159	0.838821
168	2	3	3	3	Good	4.49322	In	38	0.118299	0.883962
169	2	3	3	3	Good	2.84887	In	39	0.145329	0.872465
170	2	3	3	3	Good	0.886345	In	63	0.129491	0.88181
171	2	3	3	3	Good	5.19939	In	4	0.386265	0.748787
172	2	3	3	3	Good	2.11306	In	40	0.122159	0.854006
173	2	3	3	3	Good	3.47724	In	39	0.0492414	0.953678
174	2	3	3	3	Good	2.55254	In	40	0.203513	0.763978
175	2	3	3	3	Good	2.91589	In	39	0.206081	0.831251
176	1	1	1	1	Bad/Unreliable	25.5832	Outside AD	24	3.36299	0.15005
177	2	3	3	3	Good	4.69341	In	13	0.0909088	0.904617
178	2	2	3	3	Good	-0.684026	In	30	0.364813	0.554409
179	2	3	3	3	Good	3.7525	In	38	0.321029	0.677167
180	2	3	3	3	Good	3.6776	In	4	0.190581	0.857967
181	3	3	3	3	Good	3.44282	In	37	0.132604	0.783422
182	3	3	3	3	Good	4.32137	In	37	0.198046	0.669705
183	2	3	2	2	Moderate	2.72042	In	54	0.365565	0.681954
184	2	3	3	3	Good	3.4561	In	32	0.187907	0.835285
185	2	3	3	3	Good	1.39057	In	63	0.19385	0.833863
186	2	3	3	3	Good	1.74665	In	23	0.165952	0.789478
187	2	3	3	3	Good	3.12229	In	52	0.111674	0.876011
188	2	3	3	3	Good	4.30824	In	67	0.332666	0.788214
189	2	3	3	3	Good	4.48836	In	24	0.221667	0.695748
190	2	3	3	3	Good	3.4694	In	39	0.192285	0.79683
191	2	3	3	3	Good	2.24102	In	23	0.176165	0.782861
192	2	3	3	3	Good	3.6304	In	32	0.133179	0.842263
193	2	3	3	3	Good	2.52642	In	46	0.133816	0.835348
194	2	3	3	3	Good	2.59885	In	15	0.132359	0.856761
195	2	2	3	3	Good	-1.60814	In	63	0.38689	0.626149
196	2	3	3	3	Good	4.86323	In	4	0.383176	0.720542
197	2	3	3	3	Good	3.55307	In	3	0.170996	0.834314
198	1	1	1	1	Bad/Unreliable	32.8672	Outside AD	24	4.43075	0.121806
199	2	3	3	3	Good	0.905044	In	63	0.183576	0.832316
200	2	3	3	3	Good	0.787207	In	15	0.271139	0.763104
201	2	3	3	3	Good	1.54154	In	63	0.245456	0.805843
202	2	3	3	3	Good	2.25277	In	63	0.140638	0.860677
203	2	3	3	3	Good	3.5996	In	16	0.0721336	0.940043
204	3	3	3	3	Good	4.48088	In	49	0.109284	0.909617
205	2	3	3	3	Good	3.48242	In	37	0.101391	0.828946
206	2	3	3	3	Good	1.91956	In	15	0.174519	0.853224
207	1	1	1	1	Bad/Unreliable	33.2794	Outside AD	24	4.40096	0.105646
208	2	3	3	3	Good	1.78123	In	63	0.110711	0.906563
209	2	3	3	3	Good	1.75483	In	64	0.0306657	0.970141
210	2	3	3	3	Good	5.16362	In	67	0.443895	0.784878
211	2	1	1	2	Moderate	12.7045	Outside AD	24	1.26246	0.260688
212	2	1	1	2	Moderate	12.0582	Outside AD	24	1.15971	0.31885
213	2	3	3	3	Good	4.30824	In	67	0.332666	0.788214
User-defined Weightage :
To Score MAE(Loo)	0.5
To Score (AD)	0.5
To Score (Mean)	0
Internal validation metrics:
R^2	0.81697
Q^2(LOO)	0.69297
Avg Rm^2	0.60299
Delta Rm^2	0.09499
MAE (100% data)	0.8227
MAE (95% data)	0.73259

## Sheet: Table S3-S4
Table S3. Detailed results of the prediction quality for each compound in the test set of the male rat QSAR model defined by Equation (2).
TestCompNo	Score(MAE-LOO)	Score(Proximity Train YObs Mean)	Score(Similarity based AD)	CompositeScore	Prediction Quality	Yobs(Test)	YPred(Test)	AbsPredictionError	Score(AbsPredictionError)	AD status	YObs(Test) Distribution	Closest Training Compound	Euclidean Distance	Generalized Jaccard Coeff.
3	2	3	3	3	Good	3.5724	3.99305	0.420654	3	In	Between +1SD and -1SD	4	0.173249	0.88292
6	2	3	3	3	Good	4.7034	3.72828	0.975117	3	In	Between +1SD and -1SD	2	0.129797	0.902955
15	2	3	3	3	Good	1.782	1.9777	0.195699	3	In	Between +1SD and -1SD	5	0.149992	0.910987
17	2	3	3	3	Good	1.308	1.67455	0.36655	3	In	Between -1SD and -2SD	10	0.284788	0.83741
29	2	3	3	3	Good	2.8566	1.96685	0.889754	3	In	Between +1SD and -1SD	39	0.192406	0.873913
33	2	3	3	3	Good	5.54	4.38718	1.15282	3	In	Between +1SD and +2SD	63	0.13471	0.899634
48	2	3	3	3	Good	3.9176	2.94774	0.969863	3	In	Between +1SD and -1SD	28	0.253718	0.86021
49	1	3	3	3	Good	4.4491	3.53887	0.910234	3	In	Between +1SD and -1SD	61	0.159386	0.872586
53	2	3	3	3	Good	2.4517	1.93601	0.515691	3	In	Between +1SD and -1SD	10	0.116902	0.912746
60	2	3	3	3	Good	3.044	3.77041	0.726414	3	In	Between +1SD and -1SD	45	0.419613	0.777609
Best Weightage found :
To Score MAE(Loo)	0.2
To Score (AD)	0.8
To Score (Mean)	0
Correct Score Prediction(%) : 100
Internal validation metrics:
R^2	0.62557
Q^2(LOO)	0.421
Avg Rm^2	0.32094
Delta Rm^2	0.11396
MAE (100% data)	1.09346
MAE (95% data)	0.94447
External validation metrics:
Q2F1 (or R2pred)	0.62704
Q2F2	0.6255
Q2F3	0.8203
Avg Rm^2 (Test)	0.62308
Delta Rm^2 (Test)	0.08511
CCC (test)	0.7757
MAE (100% Test data)	0.71228
MAE (95% Test data)	0.66333
Table S4. Detailed results of the prediction quality for each unknown external compound in the male rat QSAR model defined by Equation (2).
TestCompNo	Score(MAE-LOO)	Score(Proximity Train YObs Mean)	Score(Similarity based AD)	CompositeScore	Prediction Quality	YPred(Test)	AD status	Closest Training Compound	Euclidean Distance	Generalized Jaccard Coeff.
1	2	3	3	3	Good	5.24717	In	37	0.173103	0.867223
7	2	3	3	3	Good	3.05481	In	11	0.105162	0.925521
8	2	3	3	3	Good	3.49871	In	11	0.0628942	0.954991
12	2	3	3	3	Good	3.75713	In	11	0.254059	0.881594
13	2	3	3	3	Good	2.93407	In	11	0.219047	0.856827
14	2	3	3	3	Good	4.31711	In	67	0.232838	0.854959
16	2	3	3	3	Good	3.77245	In	61	0.134325	0.890205
18	2	3	3	3	Good	1.62433	In	42	0.287052	0.837244
19	2	3	3	3	Good	3.44935	In	67	0.151956	0.906932
21	2	3	3	3	Good	3.66876	In	41	0.142885	0.903853
22	2	3	3	3	Good	3.93386	In	41	0.219761	0.851636
24	2	3	3	3	Good	2.30881	In	32	0.168623	0.867541
27	2	3	3	3	Good	3.74904	In	11	0.0719264	0.950671
30	2	3	3	3	Good	4.17768	In	41	0.16376	0.891895
31	2	3	3	3	Good	2.59276	In	11	0.233893	0.842891
35	2	3	2	2	Moderate	1.31145	In	50	0.343275	0.705258
36	2	3	3	3	Good	3.08644	In	40	0.214096	0.852657
38	2	3	3	3	Good	4.37099	In	2	0.112287	0.91703
43	2	3	3	3	Good	3.11032	In	41	0.112486	0.927809
44	2	3	3	3	Good	2.49221	In	67	0.256465	0.887743
51	2	3	3	3	Good	3.19643	In	32	0.106324	0.924307
54	2	3	2	2	Moderate	4.94055	In	66	0.308194	0.771908
56	2	3	3	3	Good	5.72105	In	55	0.231857	0.774445
57	2	3	3	3	Good	2.61164	In	65	0.382011	0.708289
62	1	1	1	1	Bad/Unreliable	-47.2838	Outside AD	65	8.84231	0.18577
64	2	3	1	1	Bad/Unreliable	2.768	Outside AD	65	0.52948	0.664483
108	2	3	3	3	Good	3.15208	In	46	0.126888	0.90731
109	2	3	3	3	Good	4.26046	In	37	0.124639	0.91119
110	2	3	3	3	Good	4.1215	In	37	0.116558	0.914304
111	2	3	3	3	Good	3.49871	In	11	0.0628942	0.954991
112	2	3	3	3	Good	1.95715	In	45	0.170014	0.873684
113	2	3	2	2	Moderate	4.27593	In	65	0.435392	0.622153
114	2	3	3	3	Good	2.98716	In	9	0.122995	0.915497
115	2	3	3	3	Good	3.49725	In	61	0.100926	0.922187
116	2	3	3	3	Good	2.94373	In	32	0.125898	0.895867
117	2	3	3	3	Good	5.42817	In	32	0.326208	0.766702
118	2	3	3	3	Good	2.56828	In	32	0.160409	0.900153
119	2	3	1	1	Bad/Unreliable	6.13423	Outside AD	65	0.55333	0.563647
120	2	3	3	3	Good	3.01989	In	41	0.152027	0.909442
121	2	3	3	3	Good	3.34924	In	39	0.13488	0.90738
122	2	3	3	3	Good	2.23143	In	10	0.188884	0.89345
123	2	3	3	3	Good	5.76804	In	59	0.173344	0.854409
124	2	3	2	2	Moderate	3.74937	In	26	0.460991	0.727134
125	2	3	3	3	Good	3.80114	In	40	0.195653	0.865812
126	2	3	2	2	Moderate	4.20809	In	26	0.516869	0.716037
127	2	3	3	3	Good	2.70795	In	5	0.041593	0.97095
128	2	3	3	3	Good	1.46684	In	5	0.11471	0.935167
129	2	3	3	3	Good	3.61047	In	42	0.159693	0.903154
130	2	3	3	3	Good	2.78147	In	20	0.251756	0.834459
131	2	3	3	3	Good	4.79303	In	55	0.0436773	0.961021
132	2	3	3	3	Good	4.01758	In	4	0.152206	0.900864
133	2	3	3	3	Good	3.5917	In	61	0.150682	0.871665
134	2	3	3	3	Good	2.52258	In	5	0.137446	0.907448
135	2	3	3	3	Good	3.08169	In	28	0.20319	0.875313
136	2	3	3	3	Good	2.67625	In	65	0.137883	0.886432
137	2	3	3	3	Good	3.42618	In	39	0.107665	0.916445
138	2	3	3	3	Good	3.9626	In	26	0.260555	0.84666
139	2	3	3	3	Good	4.2698	In	37	0.180065	0.899946
140	2	3	3	3	Good	2.07882	In	10	0.137648	0.908463
141	2	3	3	3	Good	2.87265	In	11	0.243788	0.842879
142	2	3	3	3	Good	2.76035	In	9	0.164001	0.877697
143	2	2	3	3	Good	7.40797	In	58	0.221102	0.763224
144	1	3	3	3	Good	3.14158	In	32	0.0580285	0.950079
145	2	3	3	3	Good	3.42642	In	32	0.104426	0.917227
146	2	3	3	3	Good	2.52084	In	65	0.220795	0.845715
147	2	3	3	3	Good	1.64325	In	45	0.142663	0.915698
148	2	3	1	1	Bad/Unreliable	0.967994	Outside AD	45	0.323064	0.804949
149	2	3	3	3	Good	1.75445	In	28	0.445893	0.789246
150	2	3	1	1	Bad/Unreliable	5.31275	Outside AD	66	0.42172	0.736975
151	2	3	3	3	Good	2.6646	In	32	0.147124	0.877279
152	2	3	1	1	Bad/Unreliable	5.50554	Outside AD	55	0.314867	0.75351
153	2	3	3	3	Good	2.84877	In	26	0.405061	0.791009
154	2	3	3	3	Good	1.00369	In	65	0.281971	0.770444
155	2	3	2	2	Moderate	4.71886	In	40	0.425676	0.747566
156	2	3	3	3	Good	3.04063	In	63	0.198716	0.866185
157	2	3	3	3	Good	4.66638	In	47	0.280807	0.812815
158	2	3	3	3	Good	5.03068	In	47	0.358371	0.785783
159	2	3	3	3	Good	6.66736	In	26	0.403103	0.775529
160	2	3	3	3	Good	3.10806	In	61	0.215018	0.831338
161	2	3	3	3	Good	2.86209	In	63	0.147151	0.894285
162	2	3	3	3	Good	2.70151	In	11	0.0980308	0.919637
163	2	3	3	3	Good	3.63431	In	63	0.149217	0.891586
164	2	3	3	3	Good	3.59183	In	32	0.127909	0.900817
165	2	3	3	3	Good	4.23146	In	47	0.314578	0.78771
166	2	3	3	3	Good	1.88872	In	39	0.175808	0.872074
167	2	3	3	3	Good	4.55073	In	63	0.133066	0.90911
168	2	3	3	3	Good	1.56292	In	65	0.207942	0.833227
169	1	3	3	3	Good	2.87146	In	46	0.0631204	0.954102
170	2	3	3	3	Good	2.48366	In	46	0.101098	0.917321
171	2	3	3	3	Good	3.53861	In	2	0.122323	0.918686
172	2	3	3	3	Good	2.86597	In	41	0.107631	0.934933
173	2	3	3	3	Good	3.55532	In	2	0.115665	0.929591
174	1	1	1	1	Bad/Unreliable	9.80592	Outside AD	66	0.899086	0.597879
175	2	3	3	3	Good	3.22891	In	65	0.16418	0.866547
176	1	3	3	3	Good	4.5621	In	32	0.175466	0.864365
177	2	3	3	3	Good	4.83033	In	61	0.147091	0.899193
178	2	3	3	3	Good	3.91543	In	26	0.374431	0.792488
179	2	3	3	3	Good	3.06813	In	41	0.126303	0.925908
180	2	3	3	3	Good	4.85897	In	2	0.124973	0.895397
181	2	3	3	3	Good	3.41943	In	41	0.151045	0.901545
182	2	3	3	3	Good	3.28276	In	42	0.171779	0.896234
183	2	3	1	1	Bad/Unreliable	2.0295	Outside AD	65	0.367287	0.712464
184	2	3	3	3	Good	3.29214	In	41	0.066045	0.954752
185	2	3	3	3	Good	3.16047	In	39	0.133991	0.911339
186	2	3	3	3	Good	5.95905	In	26	0.513649	0.714071
187	2	3	3	3	Good	0.525818	In	10	0.191557	0.869115
188	2	3	3	3	Good	3.54976	In	39	0.12931	0.899396
189	2	3	3	3	Good	3.85556	In	2	0.134159	0.881922
190	2	3	3	3	Good	3.03767	In	63	0.169302	0.887706
191	2	3	3	3	Good	1.66534	In	5	0.152279	0.887898
192	2	3	3	3	Good	2.63867	In	11	0.161771	0.895434
193	1	3	3	3	Good	3.86438	In	2	0.179933	0.868222
194	2	3	3	3	Good	3.89024	In	37	0.139722	0.917328
195	2	3	3	3	Good	2.66123	In	45	0.164736	0.893328
196	2	3	3	3	Good	4.18939	In	55	0.375839	0.80453
197	2	3	3	3	Good	3.88685	In	47	0.391275	0.777447
198	2	2	1	1	Bad/Unreliable	8.13459	Outside AD	66	0.718475	0.504338
199	2	3	3	3	Good	2.2061	In	34	0.202077	0.865402
200	2	3	3	3	Good	4.22957	In	47	0.451058	0.726271
201	2	3	3	3	Good	1.78308	In	32	0.153243	0.905691
202	2	3	3	3	Good	2.5173	In	28	0.221993	0.867459
203	2	3	3	3	Good	5.09281	In	42	0.256673	0.847296
204	2	3	3	3	Good	4.07091	In	67	0.238618	0.867318
205	2	3	3	3	Good	5.84061	In	37	0.307008	0.791749
206	2	3	3	3	Good	3.88326	In	63	0.242666	0.839418
207	2	1	1	1	Bad/Unreliable	9.2629	Outside AD	47	0.491745	0.680589
208	2	3	1	1	Bad/Unreliable	6.08192	Outside AD	65	0.560584	0.663493
209	2	3	1	1	Bad/Unreliable	5.00154	Outside AD	55	0.516458	0.672963
210	1	3	3	3	Good	5.3365	In	2	0.166142	0.8861
211	2	1	1	1	Bad/Unreliable	10.4314	Outside AD	66	0.653555	0.580934
212	2	3	3	3	Good	2.29665	In	46	0.0646688	0.954258
213	2	3	3	3	Good	3.54976	In	39	0.12931	0.899396
User-defined Weightage :
To Score MAE(Loo)	0.2
To Score (AD)	0.8
To Score (Mean)	0
Internal validation metrics:
R^2	0.62557
Q^2(LOO)	0.421
Avg Rm^2	0.32094
Delta Rm^2	0.11396
MAE (100% data)	1.09346
MAE (95% data)	0.94447

## Sheet: Table S5-S6
Table S5. Detailed results of the prediction quality for each compound in the test set of the female mouse QSAR model defined by Equation (3).
TestCompNo	Score(MAE-LOO)	Score(Proximity Train YObs Mean)	Score(Similarity based AD)	CompositeScore	Prediction Quality	Yobs(Test)	YPred(Test)	AbsPredictionError	Score(AbsPredictionError)	AD status	YObs(Test) Distribution	Closest Training Compound	Euclidean Distance	Generalized Jaccard Coeff.
2	2	3	3	3	Good	4.6694	4.36226	0.307137	3	In	Between +1SD and +2SD	49	0.23924	0.695828
10	2	3	3	3	Good	0.4015	0.754634	0.353134	3	In	Between -1SD and -2SD	5	0.152694	0.863021
15	2	3	3	3	Good	1.5709	2.06855	0.497646	3	In	Between +1SD and -1SD	53	0.107077	0.896623
18	3	3	3	3	Good	3.6888	2.53329	1.15551	3	In	Between +1SD and -1SD	17	0.206078	0.821677
27	2	3	3	3	Good	3.2252	3.25747	0.032272	3	In	Between +1SD and -1SD	12	0.161117	0.764528
30	3	3	3	3	Good	2.0692	2.90781	0.838615	3	In	Between +1SD and -1SD	12	0.236832	0.714325
32	2	3	3	3	Good	3.8504	3.25604	0.594357	3	In	Between +1SD and -1SD	63	0.0695883	0.901846
38	2	3	3	3	Good	3.0895	3.63103	0.541533	3	In	Between +1SD and -1SD	12	0.168	0.770026
48	2	3	3	3	Good	4.1608	3.9591	0.201703	3	In	Between +1SD and -1SD	16	0.119407	0.888946
65	2	3	3	3	Good	1.1432	1.66146	0.51826	3	In	Between -1SD and -2SD	52	0.224077	0.784503
Best Weightage found :
To Score MAE(Loo)	0.5
To Score (AD)	0.5
To Score (Mean)	0
Correct Score Prediction(%) : 100
Internal validation metrics:
R^2	0.81316
Q^2(LOO)	0.71553
Avg Rm^2	0.60691
Delta Rm^2	0.20122
MAE (100% data)	0.69851
MAE (95% data)	0.64503
External validation metrics:
Q2F1 (or R2pred)	0.81253
Q2F2	0.80815
Q2F3	0.85952
Avg Rm^2 (Test)	0.62646
Delta Rm^2 (Test)	0.17821
CCC (test)	0.88081
MAE (100% Test data)	0.50402
MAE (95% Test data)	0.43163
Table S6. Detailed results of the prediction quality for each unknown external compound in the female mouse QSAR model defined by Equation (3).
TestCompNo	Score(MAE-LOO)	Score(Proximity Train YObs Mean)	Score(Similarity based AD)	CompositeScore	Prediction Quality	YPred(Test)	AD status	Closest Training Compound	Euclidean Distance	Generalized Jaccard Coeff.
6	3	3	3	3	Good	0.731641	In	51	0.231766	0.779001
8	2	3	3	3	Good	4.32443	In	7	0.197905	0.818967
9	3	3	3	3	Good	1.47207	In	52	0.109566	0.88661
14	2	3	3	3	Good	2.05435	In	3	0.0845836	0.913447
19	2	3	3	3	Good	2.1817	In	4	0.0730694	0.927962
24	2	3	3	3	Good	3.49913	In	62	0.172158	0.782813
25	2	2	3	3	Good	6.38771	In	16	0.257538	0.763263
26	2	3	3	3	Good	3.4415	In	17	0.137465	0.891056
28	2	3	3	3	Good	2.83764	In	29	0.0723907	0.923188
31	2	3	2	2	Moderate	2.13718	In	46	0.382261	0.700969
33	2	3	3	3	Good	4.05577	In	7	0.22322	0.771215
34	2	3	3	3	Good	2.07291	In	5	0.0426032	0.96592
35	2	3	3	3	Good	3.85946	In	57	0.139362	0.748437
37	2	3	3	3	Good	5.16299	In	21	0.157683	0.873491
40	2	3	3	3	Good	3.43588	In	63	0.132205	0.830575
41	2	3	3	3	Good	4.76095	In	68	0.226007	0.706514
45	2	3	3	3	Good	0.77349	In	5	0.193471	0.82958
47	2	3	3	3	Good	3.79567	In	16	0.219283	0.762578
50	3	3	3	3	Good	1.44892	In	51	0.18489	0.803832
54	2	3	3	3	Good	1.81731	In	69	0.264945	0.758249
55	2	3	1	2	Moderate	2.67624	Outside AD	51	0.35436	0.662641
56	2	3	3	3	Good	3.96991	In	57	0.0957701	0.830915
58	2	3	3	3	Good	3.6946	In	57	0.151533	0.705918
60	3	3	3	3	Good	1.06576	In	23	0.120862	0.862348
64	2	2	1	2	Moderate	7.44227	Outside AD	57	0.433178	0.331177
67	2	3	3	3	Good	2.00495	In	13	0.139291	0.889856
108	2	3	3	3	Good	2.82592	In	46	0.152937	0.859559
109	2	3	3	3	Good	3.99964	In	7	0.210853	0.812636
110	2	3	3	3	Good	3.68288	In	7	0.215403	0.799457
111	2	3	3	3	Good	2.79401	In	52	0.370794	0.719652
112	2	3	3	3	Good	1.84052	In	5	0.0892344	0.914798
113	2	3	1	2	Moderate	3.05342	Outside AD	51	0.397749	0.586228
114	2	3	3	3	Good	3.33063	In	57	0.105866	0.797248
115	2	3	3	3	Good	3.98563	In	7	0.0745087	0.930717
116	3	3	3	3	Good	1.13261	In	51	0.0932853	0.903838
117	2	3	3	3	Good	0.839274	In	51	0.297778	0.712652
118	2	3	3	3	Good	3.41026	In	5	0.171524	0.821309
119	2	3	1	2	Moderate	3.76047	Outside AD	57	0.472594	0.231389
120	2	3	3	3	Good	4.43784	In	42	0.145236	0.82851
121	2	3	3	3	Good	1.89334	In	43	0.306917	0.690266
122	2	3	3	3	Good	2.80576	In	11	0.278286	0.784099
123	2	2	2	2	Moderate	6.88145	In	59	0.122697	0.877599
124	2	3	2	2	Moderate	3.31179	In	44	0.401916	0.581714
125	2	3	3	3	Good	4.55916	In	36	0.107656	0.899518
126	3	3	3	3	Good	3.41026	In	12	0.172192	0.77367
127	2	3	3	3	Good	2.46716	In	29	0.0754239	0.918429
128	2	3	3	3	Good	1.00357	In	4	0.141599	0.859635
129	2	3	3	3	Good	4.23514	In	22	0.116252	0.925899
130	2	3	3	3	Good	3.10111	In	57	0.164304	0.733474
131	2	3	1	2	Moderate	2.86613	Outside AD	51	0.348344	0.629312
132	2	3	3	3	Good	3.90061	In	7	0.0496681	0.959954
133	2	3	3	3	Good	3.1658	In	63	0.074536	0.891567
134	2	3	3	3	Good	1.60677	In	46	0.190938	0.83001
135	2	3	3	3	Good	3.41819	In	11	0.136826	0.905403
136	2	3	3	3	Good	0.459345	In	51	0.258418	0.765845
137	2	3	3	3	Good	3.11912	In	1	0.300977	0.735443
138	2	3	3	3	Good	4.96461	In	44	0.450798	0.627172
139	2	3	3	3	Good	5.10923	In	21	0.183698	0.812236
140	2	3	3	3	Good	2.46382	In	17	0.274572	0.789295
141	2	3	3	3	Good	2.50578	In	13	0.171492	0.85057
142	2	3	3	3	Good	2.18881	In	20	0.123121	0.880531
143	2	3	3	3	Good	3.98075	In	57	0.150166	0.7227
144	2	3	3	3	Good	3.66443	In	63	0.117044	0.838119
145	3	3	3	3	Good	0.665045	In	51	0.151008	0.857462
146	2	3	3	3	Good	4.76013	In	57	0.134664	0.708148
147	2	3	3	3	Good	1.24852	In	5	0.0987117	0.895167
148	2	3	3	3	Good	1.45111	In	46	0.202148	0.813136
149	2	3	3	3	Good	3.23423	In	66	0.0894151	0.922847
150	2	3	3	3	Good	4.12468	In	29	0.179152	0.807353
151	2	3	3	3	Good	5.25374	In	16	0.235894	0.76117
152	2	3	1	2	Moderate	6.08307	Outside AD	57	0.464236	0.174162
153	2	3	3	3	Good	-0.082294	In	44	0.38057	0.674982
154	2	3	3	3	Good	4.27499	In	57	0.253263	0.596701
155	2	3	3	3	Good	4.51867	In	7	0.282946	0.751256
156	2	3	3	3	Good	2.47671	In	46	0.114018	0.881858
157	3	3	3	3	Good	1.78857	In	52	0.233034	0.787206
158	2	3	3	3	Good	3.803	In	49	0.101279	0.879163
159	2	2	1	2	Moderate	7.00598	Outside AD	59	0.469054	0.629247
160	3	3	3	3	Good	2.23491	In	20	0.163695	0.803634
161	2	3	3	3	Good	3.07254	In	7	0.193212	0.850779
162	2	3	3	3	Good	2.63406	In	5	0.172866	0.849557
163	2	3	3	3	Good	1.96415	In	69	0.294311	0.742805
164	2	3	3	3	Good	4.18219	In	61	0.113383	0.875197
165	2	3	3	3	Good	2.55393	In	49	0.103132	0.870197
166	2	3	3	3	Good	1.49835	In	3	0.109231	0.896431
167	2	3	3	3	Good	2.78692	In	69	0.415825	0.744238
168	2	3	3	3	Good	4.30055	In	57	0.211196	0.602943
169	2	3	3	3	Good	3.18878	In	63	0.0684725	0.902984
170	2	3	3	3	Good	3.04175	In	63	0.0928889	0.874268
171	3	3	3	3	Good	3.36743	In	52	0.34656	0.712832
172	3	3	3	3	Good	2.89904	In	12	0.182909	0.779707
173	2	3	3	3	Good	3.48183	In	63	0.133524	0.844141
174	2	3	2	2	Moderate	5.85533	In	57	0.281391	0.430468
175	2	3	3	3	Good	1.14405	In	52	0.154313	0.848963
176	2	3	3	3	Good	0.799829	In	51	0.161192	0.841121
177	2	3	3	3	Good	2.95653	In	49	0.154969	0.810689
178	3	3	3	3	Good	1.26336	In	23	0.168008	0.821862
179	2	3	3	3	Good	3.0384	In	43	0.07476	0.910488
180	2	3	3	3	Good	4.85201	In	57	0.235983	0.544029
181	2	3	3	3	Good	2.49352	In	68	0.261237	0.756633
182	2	3	3	3	Good	3.0536	In	68	0.345354	0.716456
183	2	3	1	2	Moderate	1.70031	Outside AD	51	0.517697	0.519734
184	2	3	3	3	Good	4.41182	In	43	0.231857	0.769031
185	2	3	3	3	Good	3.62943	In	66	0.136895	0.866057
186	3	3	3	3	Good	1.79846	In	23	0.126089	0.849541
187	2	3	3	3	Good	1.88318	In	20	0.098613	0.900295
188	2	3	3	3	Good	4.02242	In	7	0.17836	0.816637
189	2	3	3	3	Good	3.868	In	49	0.15629	0.832715
190	2	3	3	3	Good	2.59388	In	63	0.125012	0.846297
191	2	3	3	3	Good	1.92518	In	5	0.165204	0.83202
192	2	3	3	3	Good	3.34767	In	39	0.341143	0.701509
193	2	3	3	3	Good	4.26978	In	16	0.163578	0.828229
194	2	3	3	3	Good	2.78809	In	43	0.272225	0.678211
195	2	3	3	3	Good	2.20605	In	53	0.0794549	0.920422
196	2	3	3	3	Good	3.94319	In	12	0.204873	0.678053
197	2	3	3	3	Good	2.42309	In	3	0.103187	0.921289
198	2	3	2	2	Moderate	5.71163	In	57	0.367634	0.302441
199	2	3	3	3	Good	2.42342	In	29	0.0681374	0.935892
200	2	3	3	3	Good	3.19736	In	12	0.108198	0.866632
201	2	3	3	3	Good	5.15958	In	12	0.31022	0.532944
202	2	3	3	3	Good	3.31815	In	66	0.104714	0.918368
203	2	2	1	2	Moderate	6.65281	Outside AD	59	0.310703	0.761264
204	2	3	2	2	Moderate	4.53558	In	17	0.38372	0.750189
205	2	3	2	2	Moderate	5.53278	In	59	0.301043	0.732274
206	2	3	3	3	Good	2.89019	In	63	0.135165	0.812201
207	2	3	1	2	Moderate	1.68993	Outside AD	51	0.526441	0.462592
208	2	1	1	2	Moderate	9.15355	Outside AD	59	0.464847	0.522252
209	2	1	1	2	Moderate	9.09648	Outside AD	59	0.480652	0.501477
210	2	3	3	3	Good	4.35543	In	63	0.237519	0.690252
211	2	3	3	3	Good	4.37525	In	57	0.211632	0.617607
212	2	3	2	2	Moderate	3.2278	In	1	0.370695	0.708493
213	2	3	3	3	Good	4.02242	In	7	0.17836	0.816637
User-defined Weightage :
To Score MAE(Loo)	0.5
To Score (AD)	0.5
To Score (Mean)	0
Internal validation metrics:
R^2	0.81316
Q^2(LOO)	0.71553
Avg Rm^2	0.60691
Delta Rm^2	0.20122
MAE (100% data)	0.69851
MAE (95% data)	0.64503

## Sheet: Table S7-S8
Table S7. Detailed results of the prediction quality for each compound in the test set of the male mouse QSAR model defined by Equation (4).
TestCompNo	Score(MAE-LOO)	Score(Proximity Train YObs Mean)	Score(Similarity based AD)	CompositeScore	Prediction Quality	Yobs(Test)	YPred(Test)	AbsPredictionError	Score(AbsPredictionError)	AD status	YObs(Test) Distribution	Closest Training Compound	Euclidean Distance	Generalized Jaccard Coeff.
1	2	3	3	3	Good	3.1766	3.64707	0.47047	3	In	Between +1SD and -1SD	2	0.243896	0.689059
3	2	3	3	3	Good	2.9116	2.34165	0.569952	3	In	Between +1SD and -1SD	10	0.112585	0.813572
7	2	3	3	3	Good	4.6363	4.82595	0.189649	3	In	Between +1SD and -1SD	31	0.134932	0.857124
23	2	3	3	3	Good	1.9327	1.82262	0.110082	3	In	Between +1SD and -1SD	14	0.19913	0.744703
30	2	3	3	3	Good	1.5256	1.28218	0.243417	3	In	Between +1SD and -1SD	28	0.306282	0.73622
48	2	3	3	3	Good	3.6459	3.71575	0.0698487	3	In	Between +1SD and -1SD	46	0.222038	0.657277
49	2	3	3	3	Good	2.9494	3.28541	0.33601	3	In	Between +1SD and -1SD	9	0.128775	0.790739
51	2	3	3	3	Good	2.2107	1.66961	0.541094	3	In	Between +1SD and -1SD	20	0.192002	0.794171
62	2	3	3	3	Good	3.5155	3.23632	0.279175	3	In	Between +1SD and -1SD	14	0.265572	0.670644
66	2	3	3	3	Good	3.3851	2.70719	0.677908	3	In	Between +1SD and -1SD	5	0.380802	0.246657
Best Weightage found :
To Score MAE(Loo)	0.5
To Score (AD)	0.5
To Score (Mean)	0
Correct Score Prediction(%) : 100
Internal validation metrics:
R^2	0.67526
Q^2(LOO)	0.46285
Avg Rm^2	0.33897
Delta Rm^2	0.15984
MAE (100% data)	0.94995
MAE (95% data)	0.80532
External validation metrics:
Q2F1 (or R2pred)	0.79518
Q2F2	0.78603
Q2F3	0.94856
Avg Rm^2 (Test)	0.67682
Delta Rm^2 (Test)	0.12897
CCC (test)	0.91335
MAE (100% Test data)	0.34876
MAE (95% Test data)	0.31219
Table S8. Detailed results of the prediction quality for each unknown external compound in the male mouse QSAR model defined by Equation (4).
TestCompNo	Score(MAE-LOO)	Score(Proximity Train YObs Mean)	Score(Similarity based AD)	CompositeScore	Prediction Quality	YPred(Test)	AD status	Closest Training Compound	Euclidean Distance	Generalized Jaccard Coeff.
4	2	3	3	3	Good	2.464	In	5	0.0937171	0.859933
6	2	3	3	3	Good	3.88899	In	5	0.349349	0.403845
11	2	3	3	3	Good	4.43959	In	46	0.280652	0.617059
13	2	3	1	2	Moderate	6.74439	Outside AD	31	0.364244	0.714999
16	2	3	3	3	Good	3.70906	In	17	0.247949	0.585341
18	1	2	1	1	Bad/Unreliable	7.4093	Outside AD	56	0.749833	0.481662
24	2	3	3	3	Good	4.02523	In	9	0.232593	0.632632
27	2	3	3	3	Good	3.75395	In	15	0.17679	0.811778
33	2	3	3	3	Good	5.10933	In	2	0.238655	0.787073
34	2	3	3	3	Good	1.89405	In	10	0.112919	0.787018
37	2	3	3	3	Good	5.02375	In	25	0.159858	0.819358
40	2	3	3	3	Good	3.65518	In	65	0.223254	0.788481
41	2	3	3	3	Good	3.05094	In	9	0.163595	0.721285
43	2	3	3	3	Good	3.01105	In	19	0.220855	0.707926
45	2	3	3	3	Good	2.5802	In	14	0.213803	0.724102
47	2	3	3	3	Good	2.07901	In	52	0.067957	0.924757
50	2	3	3	3	Good	4.77316	In	5	0.356309	0.610158
58	2	3	3	3	Good	2.30977	In	2	0.353213	0.66678
60	2	3	3	3	Good	1.24273	In	39	0.281238	0.788793
63	2	3	3	3	Good	0.736047	In	20	0.147831	0.831925
64	2	3	3	3	Good	2.90597	In	53	0.48622	0.733193
67	2	3	3	3	Good	3.11717	In	5	0.12811	0.817064
68	2	1	1	2	Moderate	10.9202	Outside AD	31	0.948176	0.467839
108	2	3	3	3	Good	0.771205	In	20	0.121325	0.876527
109	2	3	3	3	Good	3.92819	In	2	0.20668	0.822646
110	2	3	3	3	Good	4.86349	In	2	0.0270195	0.966524
111	2	3	3	3	Good	3.23438	In	8	3.48927e-10	1
112	2	3	3	3	Good	2.64336	In	32	0.166922	0.729354
113	2	3	2	2	Moderate	4.07963	In	55	0.180769	0.836839
114	2	3	3	3	Good	1.48482	In	28	0.230483	0.772318
115	2	3	3	3	Good	5.62585	In	31	0.332567	0.714263
116	2	3	3	3	Good	4.06582	In	46	0.253594	0.660662
117	2	1	1	2	Moderate	8.59517	Outside AD	55	0.375263	0.746553
118	2	3	3	3	Good	3.68774	In	61	0.149425	0.836624
119	2	3	2	2	Moderate	5.02027	In	55	0.229027	0.825084
120	2	3	3	3	Good	3.64434	In	5	0.213757	0.59541
121	2	3	3	3	Good	3.81359	In	8	0.275454	0.642425
122	2	3	3	3	Good	3.43077	In	17	0.180135	0.731343
123	2	3	3	3	Good	5.61137	In	26	0.390679	0.578583
124	2	3	3	3	Good	0.748911	In	20	0.213221	0.770942
125	2	3	3	3	Good	3.65413	In	36	0.118046	0.893428
126	2	3	3	3	Good	0.918299	In	20	0.20763	0.800052
127	2	3	3	3	Good	2.54104	In	19	0.173433	0.780946
128	2	3	3	3	Good	4.66549	In	61	0.298227	0.680759
129	2	3	3	3	Good	4.02338	In	25	0.172202	0.782483
130	1	1	1	1	Bad/Unreliable	11.2613	Outside AD	55	1.23033	0.549002
131	2	3	2	2	Moderate	5.10836	In	55	0.0395102	0.970635
132	2	3	3	3	Good	2.84187	In	29	0.251239	0.750993
133	2	3	3	3	Good	4.53633	In	9	0.183807	0.750763
134	2	3	3	3	Good	2.74887	In	5	0.131042	0.791145
135	2	3	3	3	Good	4.56126	In	31	0.272699	0.66047
136	2	3	3	3	Good	4.1655	In	65	0.163871	0.844537
137	2	3	3	3	Good	2.27782	In	54	0.260036	0.620221
138	2	3	2	2	Moderate	5.90783	In	31	0.358737	0.644078
139	2	3	3	3	Good	6.08174	In	25	0.295834	0.681824
140	2	3	3	3	Good	3.55476	In	25	0.255327	0.653579
141	2	3	3	3	Good	3.71702	In	61	0.0899241	0.880238
142	2	3	3	3	Good	4.12995	In	5	0.230125	0.686264
143	2	3	2	2	Moderate	1.17621	In	53	0.304677	0.762282
144	2	3	3	3	Good	3.58206	In	15	0.189563	0.816862
145	2	3	3	3	Good	4.12129	In	46	0.190219	0.686621
146	2	3	3	3	Good	2.54117	In	65	0.224054	0.824232
147	2	3	3	3	Good	3.12059	In	29	0.251875	0.758439
148	2	3	3	3	Good	1.38342	In	28	0.183693	0.831842
149	2	3	3	3	Good	3.11442	In	46	0.237298	0.630286
150	2	3	3	3	Good	3.88869	In	5	0.400537	0.362532
151	2	3	3	3	Good	4.72245	In	25	0.326781	0.618109
152	2	1	1	2	Moderate	8.85095	Outside AD	55	0.647041	0.642595
153	2	3	3	3	Good	2.63033	In	5	0.138762	0.706761
154	2	3	3	3	Good	1.36221	In	20	0.188504	0.796962
155	2	3	3	3	Good	4.73104	In	2	0.0785673	0.918124
156	2	3	3	3	Good	2.94778	In	19	0.120994	0.834101
157	2	3	3	3	Good	1.47551	In	20	0.275143	0.79874
158	2	3	2	2	Moderate	5.18444	In	2	0.278417	0.682618
159	2	3	2	2	Moderate	6.17073	In	26	0.245974	0.686052
160	2	3	3	3	Good	2.99569	In	5	0.0975452	0.805298
161	2	3	3	3	Good	1.86772	In	15	0.172228	0.857165
162	2	3	3	3	Good	4.49379	In	31	0.233123	0.701215
163	2	3	3	3	Good	2.81124	In	35	0.213405	0.791358
164	2	3	3	3	Good	1.27715	In	28	0.193332	0.816716
165	2	3	3	3	Good	0.593982	In	44	0.133824	0.777016
166	2	3	3	3	Good	3.04958	In	5	0.0917752	0.820971
167	2	3	3	3	Good	4.06291	In	8	0.393404	0.551764
168	2	3	3	3	Good	1.83895	In	65	0.153714	0.879373
169	2	3	3	3	Good	2.44824	In	35	0.232935	0.74729
170	2	3	3	3	Good	2.28479	In	44	0.198985	0.701119
171	2	3	3	3	Good	4.83341	In	2	0.257118	0.747571
172	2	3	3	3	Good	2.19716	In	38	0.478214	0.672154
173	2	3	3	3	Good	2.80846	In	15	0.132184	0.868528
174	2	3	3	3	Good	1.61565	In	52	0.222138	0.772355
175	2	3	3	3	Good	2.10703	In	35	0.174433	0.79743
176	2	3	3	3	Good	5.02476	In	55	0.272803	0.743694
177	2	3	3	3	Good	4.04182	In	61	0.191237	0.762618
178	2	3	3	3	Good	1.43973	In	39	0.211463	0.840381
179	2	3	3	3	Good	1.83941	In	10	0.240351	0.524729
180	2	3	3	3	Good	2.15453	In	20	0.206051	0.788192
181	2	3	2	2	Moderate	3.93388	In	31	0.250998	0.756959
182	2	3	1	2	Moderate	4.76855	Outside AD	31	0.308076	0.67888
183	2	3	3	3	Good	3.69073	In	65	0.113599	0.910798
184	2	3	3	3	Good	2.65933	In	44	0.186462	0.753062
185	2	3	3	3	Good	3.27167	In	46	0.195704	0.725518
186	2	3	3	3	Good	3.3388	In	46	0.276014	0.600348
187	2	3	3	3	Good	3.58233	In	28	0.218965	0.810673
188	2	3	3	3	Good	3.24682	In	8	0.229433	0.654653
189	2	3	3	3	Good	3.58933	In	10	0.217523	0.63255
190	2	3	3	3	Good	2.25023	In	15	0.136601	0.828881
191	2	3	3	3	Good	2.11047	In	10	0.112025	0.791343
192	2	3	3	3	Good	5.26999	In	31	0.0400264	0.946985
193	2	3	3	3	Good	4.16062	In	35	0.251235	0.767478
194	2	3	3	3	Good	1.57538	In	15	0.13995	0.854963
195	2	3	3	3	Good	3.18193	In	19	0.161796	0.81275
196	2	3	3	3	Good	2.26579	In	65	0.135255	0.879019
197	2	3	3	3	Good	2.23489	In	19	0.140344	0.817012
198	2	3	3	3	Good	3.35362	In	35	0.240537	0.798249
199	2	3	3	3	Good	1.31399	In	12	0.231507	0.756543
200	2	3	3	3	Good	3.59956	In	65	0.126515	0.898886
201	2	3	3	3	Good	3.37504	In	38	0.213448	0.795838
202	2	3	3	3	Good	4.08461	In	46	0.23919	0.655803
203	2	3	3	3	Good	5.18099	In	26	0.187672	0.756591
204	1	3	3	2	Moderate	5.01992	In	26	0.32542	0.627701
205	2	3	3	3	Good	5.47802	In	26	0.25322	0.698466
206	2	3	3	3	Good	0.927591	In	28	0.208808	0.806446
207	2	1	1	2	Moderate	9.46499	Outside AD	55	0.751855	0.676392
208	2	3	2	2	Moderate	3.03862	In	22	0.629638	0.567326
209	2	3	2	2	Moderate	3.76867	In	22	0.641637	0.573674
210	2	3	3	3	Good	3.61235	In	53	0.0841295	0.935074
211	2	3	3	3	Good	1.8017	In	35	0.217189	0.77575
212	2	3	3	3	Good	4.99786	In	31	0.175086	0.762518
213	2	3	3	3	Good	3.24682	In	8	0.229433	0.654653
User-defined Weightage :
To Score MAE(Loo)	0.5
To Score (AD)	0.5
To Score (Mean)	0
Internal validation metrics:
R^2	0.67526
Q^2(LOO)	0.46285
Avg Rm^2	0.33897
Delta Rm^2	0.15984
MAE (100% data)	0.94995
MAE (95% data)	0.80532

## Sheet: Table S9-S10
Table S9. Detailed results of the prediction quality for each compound in the test set of the rat QSAR model defined by Equation (5).
TestCompNo	Score(MAE-LOO)	Score(Proximity Train YObs Mean)	Score(Similarity based AD)	CompositeScore	Prediction Quality	Yobs(Test)	YPred(Test)	AbsPredictionError	Score(AbsPredictionError)	AD status	YObs(Test) Distribution	Closest Training Compound	Euclidean Distance	Generalized Jaccard Coeff.
5	2	3	3	3	Good	3.3444	3.23465	0.109751	3	In	Between +1SD and -1SD	67	0.20343	0.841571
6	2	3	3	3	Good	4.744	4.00777	0.736228	3	In	Between +1SD and -1SD	16	0.144101	0.870494
20	2	3	3	3	Good	1.4305	2.44984	1.01934	3	In	Between +1SD and -1SD	15	0.298049	0.752324
28	2	3	3	3	Good	1.4454	1.31639	0.129006	3	In	Between +1SD and -1SD	15	0.244054	0.791361
33	2	3	3	3	Good	5.3392	5.39093	0.0517346	3	In	Between +1SD and +2SD	4	0.19296	0.89379
34	3	3	3	3	Good	3.0102	1.86648	1.14372	3	In	Between +1SD and -1SD	67	0.295227	0.758244
37	2	3	3	3	Good	4.3107	3.56114	0.74956	3	In	Between +1SD and -1SD	2	0.274259	0.818652
46	2	3	3	3	Good	2.6042	2.34828	0.255916	3	In	Between +1SD and -1SD	32	0.196107	0.746619
48	2	3	3	3	Good	3.9176	4.19352	0.275921	3	In	Between +1SD and -1SD	4	0.244224	0.826176
64	2	3	2	3	Good	0.9423	0.915301	0.026999	3	In	Between -1SD and -2SD	57	0.301958	0.751088
68	2	3	3	3	Good	3.4456	4.37077	0.925172	3	In	Between +1SD and -1SD	4	0.142959	0.92156
Best Weightage found :
To Score MAE(Loo)	0.5
To Score (AD)	0
To Score (Mean)	0.5
Correct Score Prediction(%) : 100
Internal validation metrics:
R^2	0.6277
Q^2(LOO)	0.47176
Avg Rm^2	0.33267
Delta Rm^2	0.22236
MAE (100% data)	0.9831
MAE (95% data)	0.83174
External validation metrics:
Q2F1 (or R2pred)	0.78429
Q2F2	0.78087
Q2F3	0.87102
Avg Rm^2 (Test)	0.71811
Delta Rm^2 (Test)	0.01963
CCC (test)	0.8882
MAE (100% Test data)	0.49303
MAE (95% Test data)	0.42796
Table S10. Detailed results of the prediction quality for each unknown external compound in the rat QSAR model defined by Equation (5).
TestCompNo	Score(MAE-LOO)	Score(Proximity Train YObs Mean)	Score(Similarity based AD)	CompositeScore	Prediction Quality	YPred(Test)	AD status	Closest Training Compound	Euclidean Distance	Generalized Jaccard Coeff.
1	2	3	3	3	Good	5.76066	In	4	0.300405	0.774676
7	2	3	3	3	Good	3.00263	In	32	0.235738	0.684201
8	2	3	3	3	Good	3.80967	In	4	0.213653	0.846416
12	2	3	3	3	Good	2.20982	In	25	0.282571	0.807947
14	2	3	3	3	Good	3.18824	In	67	0.196337	0.854673
18	2	3	3	3	Good	0.644406	In	17	0.138195	0.91564
19	2	3	3	3	Good	1.53637	In	54	0.354078	0.772931
21	2	3	3	3	Good	1.49907	In	42	0.184839	0.832161
22	2	3	3	3	Good	2.171	In	26	0.184884	0.857495
27	2	3	3	3	Good	2.68969	In	15	0.172945	0.863183
31	2	3	3	3	Good	3.3561	In	16	0.104296	0.911993
35	2	3	3	3	Good	0.650799	In	57	0.135025	0.897622
36	3	3	3	3	Good	2.27413	In	63	0.250703	0.792199
43	2	3	3	3	Good	2.6969	In	30	0.114484	0.904113
44	2	3	3	3	Good	0.877112	In	26	0.225735	0.838655
51	2	3	3	3	Good	2.66649	In	52	0.265113	0.753745
56	2	3	3	3	Good	6.40286	In	55	0.260301	0.775214
62	2	3	3	3	Good	0.627855	In	52	0.419833	0.638552
108	2	3	3	3	Good	2.46744	In	10	0.199426	0.797898
109	2	3	3	3	Good	4.77311	In	4	0.192722	0.871765
110	3	3	3	3	Good	4.00772	In	2	0.114391	0.952867
111	2	3	3	3	Good	3.80967	In	4	0.213653	0.846416
112	2	3	3	3	Good	1.89866	In	29	0.283106	0.812515
113	2	3	2	3	Good	4.53468	In	57	0.367399	0.690282
114	2	3	3	3	Good	3.40074	In	32	0.109368	0.851288
115	2	3	3	3	Good	3.43465	In	49	0.141042	0.873837
116	2	3	3	3	Good	1.96926	In	65	0.240134	0.784955
117	2	3	3	3	Good	5.02679	In	55	0.315853	0.755695
118	2	3	3	3	Good	2.10607	In	9	0.201697	0.672785
119	2	3	2	3	Good	3.42592	In	57	0.300078	0.758121
120	2	3	3	3	Good	1.94939	In	15	0.236196	0.793511
121	3	3	3	3	Good	2.98689	In	39	0.233567	0.870159
122	2	3	3	3	Good	2.10301	In	39	0.295503	0.819719
123	2	3	2	3	Good	5.61055	In	61	0.358888	0.716461
124	2	3	3	3	Good	0.789994	In	17	0.515261	0.685834
125	2	3	3	3	Good	4.70219	In	25	0.204066	0.872211
126	2	3	3	3	Good	2.42037	In	42	0.410025	0.71117
127	3	3	3	3	Good	2.28748	In	67	0.24546	0.812768
128	2	3	3	3	Good	2.26344	In	4	0.322589	0.78336
129	2	3	3	3	Good	2.98076	In	30	0.223858	0.840383
130	2	3	3	3	Good	3.22893	In	69	0.233659	0.852793
131	2	3	3	3	Good	5.15109	In	55	0.0559844	0.943486
132	2	3	3	3	Good	3.41734	In	67	0.167899	0.861482
133	2	3	3	3	Good	4.21653	In	49	0.139182	0.893696
134	2	3	3	3	Good	3.65921	In	16	0.0894665	0.931201
135	2	3	3	3	Good	3.89649	In	4	0.229184	0.839313
136	2	3	3	3	Good	2.18008	In	65	0.340251	0.741769
137	3	3	3	3	Good	3.21738	In	67	0.229482	0.812212
138	2	3	3	3	Good	2.99108	In	26	0.212626	0.833529
139	2	3	3	3	Good	4.04204	In	25	0.262189	0.838925
140	2	3	3	3	Good	1.37438	In	67	0.255779	0.82833
141	2	3	3	3	Good	-0.488971	In	63	0.348018	0.749241
142	1	3	3	2	Moderate	4.96262	In	40	0.179336	0.903481
143	2	3	3	3	Good	5.27456	In	58	0.176623	0.859483
144	2	3	3	3	Good	3.64374	In	16	0.214197	0.816625
145	2	3	3	3	Good	2.45388	In	65	0.280899	0.762237
146	2	3	3	3	Good	2.33893	In	9	0.317345	0.593382
147	2	3	3	3	Good	1.36471	In	45	0.189603	0.820088
148	2	3	3	3	Good	0.963985	In	45	0.195981	0.742616
149	3	3	3	3	Good	3.06226	In	66	0.211415	0.856077
150	2	3	1	3	Good	4.99575	Outside AD	54	0.484512	0.745788
151	2	3	3	3	Good	4.34212	In	40	0.2099	0.874832
152	2	3	2	3	Good	4.89739	In	55	0.321645	0.710753
153	2	3	3	3	Good	1.19483	In	67	0.309096	0.818076
154	2	3	3	3	Good	0.83756	In	52	0.321931	0.741854
155	2	3	3	3	Good	6.06072	In	3	0.279643	0.828968
156	2	3	3	3	Good	3.20465	In	15	0.221934	0.831581
157	3	3	3	3	Good	2.31038	In	67	0.241575	0.844007
158	2	3	1	3	Good	3.64147	Outside AD	54	0.222717	0.855203
159	2	3	3	3	Good	2.53787	In	60	0.293133	0.808935
160	2	3	3	3	Good	3.49708	In	49	0.237596	0.801128
161	2	3	3	3	Good	3.03591	In	53	0.152039	0.891203
162	2	3	3	3	Good	3.03454	In	11	0.112747	0.910671
163	2	3	3	3	Good	3.72803	In	66	0.164462	0.892075
164	2	3	3	3	Good	2.64934	In	10	0.239763	0.776699
165	3	3	2	3	Good	1.26668	In	54	0.177419	0.880205
166	2	3	3	3	Good	2.61117	In	53	0.203264	0.858696
167	2	3	3	3	Good	5.05773	In	66	0.218362	0.852733
168	2	3	3	3	Good	1.41646	In	52	0.289323	0.765685
169	2	3	3	3	Good	2.70114	In	15	0.148979	0.862977
170	2	3	3	3	Good	2.15059	In	15	0.190922	0.82957
171	2	3	3	3	Good	3.92518	In	4	0.201426	0.867624
172	2	3	3	3	Good	1.71837	In	42	0.180203	0.846164
173	2	3	3	3	Good	3.6279	In	38	0.191865	0.841733
174	2	3	3	3	Good	4.70084	In	55	0.205651	0.835979
175	2	3	3	3	Good	3.32777	In	52	0.32257	0.748022
176	2	3	3	3	Good	4.42218	In	65	0.272731	0.78757
177	2	3	3	3	Good	4.18217	In	25	0.212877	0.863471
178	2	3	3	3	Good	1.25949	In	60	0.175811	0.901786
179	2	3	3	3	Good	1.75892	In	42	0.149872	0.864261
180	2	3	3	3	Good	5.26469	In	25	0.146824	0.890758
181	2	3	3	3	Good	2.32891	In	42	0.218433	0.82981
182	2	3	3	3	Good	2.45817	In	30	0.221022	0.854152
183	2	3	1	3	Good	2.07652	Outside AD	57	0.553062	0.595147
184	2	3	3	3	Good	2.451	In	30	0.169462	0.879779
185	2	3	3	3	Good	2.76148	In	66	0.278525	0.825671
186	2	3	3	3	Good	2.30948	In	23	0.170902	0.851071
187	2	3	3	3	Good	1.39868	In	10	0.241702	0.76208
188	3	3	3	3	Good	3.66826	In	2	0.17548	0.867564
189	2	3	3	3	Good	3.68067	In	24	0.28691	0.769231
190	2	3	3	3	Good	2.45805	In	63	0.266501	0.799017
191	2	3	3	3	Good	0.940131	In	45	0.243538	0.700424
192	2	3	3	3	Good	2.2657	In	32	0.276101	0.640761
193	2	3	3	3	Good	4.48769	In	40	0.136773	0.918986
194	2	3	3	3	Good	4.08955	In	11	0.235444	0.818355
195	2	3	3	3	Good	2.45292	In	29	0.246624	0.823379
196	3	3	3	3	Good	3.24731	In	4	0.335647	0.762599
197	2	3	2	3	Good	2.18957	In	54	0.228775	0.839618
198	2	3	1	3	Good	4.55033	Outside AD	54	0.537483	0.629585
199	3	3	3	3	Good	1.00152	In	67	0.292028	0.79964
200	2	3	3	3	Good	1.46141	In	53	0.308586	0.819218
201	2	3	3	3	Good	0.758307	In	52	0.2468	0.809761
202	2	3	3	3	Good	3.86106	In	4	0.138283	0.902842
203	2	3	3	3	Good	4.66849	In	3	0.239955	0.823447
204	2	3	3	3	Good	3.96744	In	59	0.370858	0.797793
205	2	3	3	3	Good	2.77426	In	60	0.37055	0.760492
206	2	3	3	3	Good	1.50647	In	63	0.261601	0.793038
207	2	3	3	3	Good	5.59374	In	55	0.316692	0.812995
208	2	3	3	3	Good	2.92776	In	57	0.250863	0.779216
209	2	3	3	3	Good	1.99107	In	57	0.268098	0.762253
210	3	3	3	3	Good	4.26973	In	2	0.160346	0.891229
211	2	3	3	3	Good	5.03555	In	58	0.296799	0.788402
212	2	3	3	3	Good	2.4487	In	65	0.276305	0.767
213	3	3	3	3	Good	3.66826	In	2	0.17548	0.867564
User-defined Weightage :
To Score MAE(Loo)	0.5
To Score (AD)	0
To Score (Mean)	0.5
Internal validation metrics:
R^2	0.6277
Q^2(LOO)	0.47176
Avg Rm^2	0.33267
Delta Rm^2	0.22236
MAE (100% data)	0.9831
MAE (95% data)	0.83174

## Sheet: Table S11-S12
Table S11. Detailed results of the prediction quality for each compound in the test set of the mouse QSAR model defined by Equation (6).
TestCompNo	Score(MAE-LOO)	Score(Proximity Train YObs Mean)	Score(Similarity based AD)	CompositeScore	Prediction Quality	Yobs(Test)	YPred(Test)	AbsPredictionError	Score(AbsPredictionError)	AD status	YObs(Test) Distribution	Closest Training Compound	Euclidean Distance	Generalized Jaccard Coeff.
1	1	3	3	3	Good	3.7115	4.76732	1.05582	3	In	Between +1SD and -1SD	25	0.172304	0.871637
7	2	3	3	3	Good	5.2315	4.58809	0.643407	3	In	Between +1SD and +2SD	31	0.146627	0.87812
11	2	3	3	3	Good	2.5048	2.96338	0.458577	3	In	Between +1SD and -1SD	32	0.194558	0.816311
12	2	3	3	3	Good	3.7868	3.31025	0.476549	3	In	Between +1SD and -1SD	36	0.2852	0.805497
13	2	3	3	3	Good	1.2412	2.09963	0.858428	3	In	Between -1SD and -2SD	51	0.246803	0.807134
21	2	3	3	3	Good	4.527	4.17218	0.354823	3	In	Between +1SD and -1SD	9	0.298893	0.66109
35	2	3	3	3	Good	1.5089	0.483788	1.02511	3	In	Between +1SD and -1SD	65	0.397714	0.687718
38	2	3	3	3	Good	3.0895	3.00904	0.0804568	3	In	Between +1SD and -1SD	30	0.190006	0.860254
39	2	3	2	3	Good	3.7044	3.18862	0.51578	3	In	Between +1SD and -1SD	46	0.381644	0.713752
48	2	3	3	3	Good	4.1608	3.67585	0.484945	3	In	Between +1SD and -1SD	63	0.178077	0.876604
57	2	3	3	3	Good	2.5875	1.49746	1.09004	3	In	Between +1SD and -1SD	54	0.341494	0.72948
Best Weightage found :
To Score MAE(Loo)	0.2
To Score (AD)	0.3
To Score (Mean)	0.5
Correct Score Prediction(%) : 100
Internal validation metrics:
R^2	0.61606
Q^2(LOO)	0.40054
Avg Rm^2	0.27588
Delta Rm^2	0.17554
MAE (100% data)	0.95319
MAE (95% data)	0.79633
External validation metrics:
Q2F1 (or R2pred)	0.65255
Q2F2	0.63252
Q2F3	0.80617
Avg Rm^2 (Test)	0.60978
Delta Rm^2 (Test)	0.19319
CCC (test)	0.82902
MAE (100% Test data)	0.64036
MAE (95% Test data)	0.59539
Table S12. Detailed results of the prediction quality for each unknown external compound in the mouse QSAR model defined by Equation (6).
TestCompNo	Score(MAE-LOO)	Score(Proximity Train YObs Mean)	Score(Similarity based AD)	CompositeScore	Prediction Quality	YPred(Test)	AD status	Closest Training Compound	Euclidean Distance	Generalized Jaccard Coeff.
6	2	3	3	3	Good	2.77149	In	62	0.162689	0.843181
24	2	3	3	3	Good	4.24468	In	46	0.25674	0.756313
33	2	3	3	3	Good	2.17576	In	10	0.2363	0.844427
34	2	3	3	3	Good	1.99265	In	19	0.19093	0.864276
37	2	3	2	3	Good	5.08893	In	49	0.303091	0.799504
40	2	3	3	3	Good	2.46848	In	36	0.189473	0.861354
41	2	3	3	3	Good	4.64713	In	46	0.364411	0.662842
45	2	3	3	3	Good	2.91549	In	9	0.113556	0.838933
47	2	3	3	3	Good	3.75544	In	56	0.259302	0.759783
50	2	3	3	3	Good	1.46874	In	36	0.261139	0.796648
58	2	3	3	3	Good	3.36165	In	56	0.266378	0.74366
60	2	3	3	3	Good	2.23508	In	36	0.2183	0.842882
64	2	3	2	3	Good	4.26366	In	18	0.558634	0.672436
67	2	3	3	3	Good	1.1659	In	10	0.21421	0.820954
108	2	3	3	3	Good	1.87282	In	10	0.222272	0.876031
109	2	3	3	3	Good	2.21445	In	10	0.155215	0.866776
110	2	3	3	3	Good	2.44673	In	10	0.254669	0.821717
111	2	3	3	3	Good	3.72653	In	8	4.3611e-11	1
112	2	3	3	3	Good	2.44999	In	19	0.199242	0.817124
113	2	3	3	3	Good	2.96004	In	15	0.332122	0.737935
114	2	3	3	3	Good	2.68204	In	4	0.288275	0.687126
115	2	3	2	3	Good	4.76053	In	49	0.385909	0.757408
116	2	3	3	3	Good	2.27323	In	65	0.121986	0.884427
117	2	3	3	3	Good	2.37618	In	52	0.286959	0.731968
118	2	3	3	3	Good	3.55218	In	43	0.0841121	0.882406
119	2	3	3	3	Good	3.77218	In	56	0.287531	0.778445
120	2	3	3	3	Good	3.60946	In	2	0.279822	0.799748
121	2	3	3	3	Good	4.2969	In	43	0.205195	0.79082
122	1	3	3	3	Good	3.22151	In	66	0.452228	0.647671
123	1	3	3	3	Good	4.29459	In	22	0.407541	0.690768
124	2	3	3	3	Good	2.70974	In	10	0.277374	0.759127
125	2	3	3	3	Good	2.48455	In	36	0.141165	0.929132
126	2	3	3	3	Good	4.38479	In	56	0.24858	0.784182
127	2	3	3	3	Good	2.05333	In	15	0.118048	0.937355
128	2	3	1	2	Moderate	3.32146	Outside AD	61	0.435136	0.800023
129	2	3	3	3	Good	3.7751	In	9	0.334178	0.613487
130	2	3	3	3	Good	3.09236	In	36	0.223843	0.867431
131	2	3	1	2	Moderate	4.88292	Outside AD	55	0.0781848	0.942489
132	2	3	3	3	Good	2.0498	In	10	0.190529	0.834421
133	2	3	3	3	Good	3.06207	In	19	0.232675	0.781701
134	2	3	3	3	Good	2.54422	In	51	0.269049	0.791244
135	2	3	3	3	Good	2.89749	In	36	0.160026	0.875524
136	2	3	3	3	Good	2.17686	In	65	0.108152	0.912525
137	2	3	3	3	Good	4.38531	In	31	0.128541	0.909064
138	2	3	1	2	Moderate	3.40913	Outside AD	9	0.589871	0.397163
139	2	3	3	3	Good	4.50498	In	16	0.325203	0.737132
140	1	3	3	3	Good	2.24932	In	44	0.312475	0.74947
141	2	3	3	3	Good	2.45041	In	62	0.217233	0.797868
142	2	3	3	3	Good	2.37912	In	30	0.1905	0.86163
143	2	3	3	3	Good	3.96701	In	56	0.189372	0.838132
144	2	3	3	3	Good	2.86979	In	46	0.283908	0.802738
145	2	3	3	3	Good	2.45322	In	62	0.128202	0.909
146	2	3	3	3	Good	2.51181	In	65	0.140559	0.879799
147	2	3	3	3	Good	1.61869	In	44	0.229959	0.787645
148	2	3	3	3	Good	1.60347	In	44	0.254398	0.723353
149	2	3	3	3	Good	2.61642	In	36	0.233601	0.832767
150	2	3	3	3	Good	2.2449	In	54	0.199757	0.826762
151	2	3	3	3	Good	2.99579	In	52	0.293827	0.718412
152	2	3	1	2	Moderate	6.04121	Outside AD	55	0.540831	0.628786
153	2	3	3	3	Good	1.06514	In	68	0.254523	0.796727
154	2	3	3	3	Good	2.63079	In	63	0.177046	0.880117
155	2	3	3	3	Good	2.15861	In	68	0.316631	0.75509
156	2	3	3	3	Good	1.97196	In	20	0.265087	0.814234
157	2	3	3	3	Good	2.2582	In	36	0.252253	0.798157
158	2	3	3	3	Good	2.96713	In	54	0.186874	0.833462
159	2	3	2	3	Good	6.18532	In	26	0.28113	0.772814
160	2	3	3	3	Good	2.33894	In	10	0.25912	0.783903
161	2	3	3	3	Good	1.72084	In	10	0.271716	0.855827
162	2	3	3	3	Good	3.55625	In	5	0.149649	0.88532
163	2	3	3	3	Good	2.22722	In	36	0.202126	0.870266
164	2	3	3	3	Good	3.06661	In	27	0.225477	0.871068
165	2	3	3	3	Good	1.67562	In	54	0.05034	0.964001
166	2	3	3	3	Good	1.10876	In	10	0.184702	0.865513
167	2	3	3	3	Good	2.75726	In	52	0.348826	0.703009
168	2	3	3	3	Good	3.00645	In	56	0.292159	0.801277
169	2	3	3	3	Good	2.64205	In	51	0.198288	0.842927
170	2	3	3	3	Good	2.34258	In	52	0.234173	0.785985
171	2	3	3	3	Good	4.09006	In	16	0.231404	0.820701
172	2	3	3	3	Good	4.0676	In	26	0.31801	0.766906
173	2	3	3	3	Good	2.8579	In	51	0.227807	0.820434
174	2	3	1	2	Moderate	5.10395	Outside AD	55	0.273482	0.707511
175	2	3	3	3	Good	2.57925	In	65	0.234505	0.816
176	2	3	3	3	Good	3.13341	In	51	0.239542	0.817616
177	2	3	2	3	Good	4.13632	In	49	0.247954	0.820643
178	2	3	3	3	Good	3.30425	In	30	0.258662	0.791707
179	2	3	3	3	Good	4.73401	In	46	0.349586	0.67152
180	2	3	3	3	Good	2.70044	In	53	0.268406	0.80997
181	2	3	3	3	Good	2.60056	In	68	0.260724	0.769092
182	2	3	3	3	Good	1.94693	In	68	0.119895	0.893213
183	2	3	3	3	Good	2.10399	In	65	0.181574	0.852161
184	2	3	3	3	Good	3.00625	In	68	0.29129	0.741974
185	2	3	3	3	Good	2.88277	In	36	0.174648	0.874191
186	2	3	3	3	Good	4.71931	In	43	0.290628	0.711004
187	2	3	3	3	Good	1.25771	In	69	0.274067	0.705071
188	2	3	3	3	Good	1.86759	In	10	0.165358	0.889426
189	1	3	3	3	Good	2.90064	In	68	0.288532	0.753476
190	2	3	3	3	Good	2.03172	In	15	0.127486	0.893352
191	2	3	3	3	Good	3.2219	In	43	0.107621	0.851538
192	2	3	3	3	Good	3.51708	In	43	0.235076	0.770808
193	2	3	3	3	Good	3.10449	In	30	0.230441	0.825397
194	2	3	3	3	Good	2.76452	In	30	0.165197	0.846609
195	2	3	3	3	Good	2.40117	In	15	0.158365	0.900916
196	2	3	1	2	Moderate	5.84471	Outside AD	55	0.18474	0.83249
197	2	3	3	3	Good	1.20728	In	19	0.232118	0.782243
198	2	3	1	2	Moderate	5.1388	Outside AD	55	0.442919	0.598505
199	2	3	3	3	Good	3.64073	In	66	0.324573	0.746304
200	2	3	3	3	Good	2.49508	In	15	0.224393	0.824978
201	2	3	3	3	Good	3.70095	In	27	0.285104	0.803593
202	2	3	3	3	Good	2.75639	In	36	0.21056	0.865012
203	1	2	2	2	Moderate	6.74351	In	49	0.593991	0.669841
204	1	3	2	3	Good	4.48758	In	59	0.511564	0.668706
205	1	3	3	3	Good	3.66611	In	26	0.303942	0.782455
206	2	3	3	3	Good	2.07351	In	15	0.219625	0.824592
207	2	2	1	2	Moderate	6.81574	Outside AD	55	0.311311	0.695495
208	2	3	2	3	Good	3.40587	In	26	0.394578	0.723318
209	2	2	1	2	Moderate	7.12587	Outside AD	55	0.874152	0.546593
210	2	3	3	3	Good	2.42923	In	36	0.231528	0.826513
211	2	3	2	3	Good	3.72966	In	56	0.376195	0.696625
212	2	3	3	3	Good	1.06556	In	10	0.231398	0.816014
213	2	3	3	3	Good	1.86759	In	10	0.165358	0.889426
User-defined Weightage :
To Score MAE(Loo)	0.2
To Score (AD)	0.5
To Score (Mean)	0.5
Internal validation metrics:
R^2	0.61606
Q^2(LOO)	0.40054
Avg Rm^2	0.27588
Delta Rm^2	0.17554
MAE (100% data)	0.95319
MAE (95% data)	0.79633

## Sheet: Table S13-S14
Table S13. Detailed results of the prediction quality for each compound in the test set of the rat-mouse iQCCR model defined by Equation (7).
TestCompNo	Score(MAE-LOO)	Score(Proximity Train YObs Mean)	Score(Similarity based AD)	CompositeScore	Prediction Quality	Yobs(Test)	YPred(Test)	AbsPredictionError	Score(AbsPredictionError)	AD status	YObs(Test) Distribution	Closest Training Compound	Euclidean Distance	Generalized Jaccard Coeff.
4	2	3	3	3	Good	3.54439	3.17251	0.371874	3	In	Between +1SD and -1SD	42	0.00831018	0.984427
13	2	3	3	3	Good	2.58397	1.47081	1.11316	3	In	Between +1SD and -1SD	65	0.0130922	0.907823
15	2	3	3	3	Good	1.76347	1.76711	0.00363633	3	In	Between +1SD and -1SD	53	0.0201346	0.909081
23	2	3	3	3	Good	2.39961	1.66577	0.733833	3	In	Between +1SD and -1SD	53	0.0364303	0.835496
28	2	3	3	3	Good	1.44544	1.60355	0.158119	3	In	Between +1SD and -1SD	65	0.0328225	0.797096
38	2	3	3	3	Good	3.09798	3.13192	0.0339392	3	In	Between +1SD and -1SD	42	0.00015878	0.999698
39	3	3	3	3	Good	4.67224	3.68458	0.98766	3	In	Between +1SD and -1SD	68	0.0132239	0.981285
48	2	3	3	3	Good	3.91762	4.09471	0.177092	3	In	Between +1SD and -1SD	26	0.0245025	0.971819
54	2	3	3	3	Good	0.601253	1.52487	0.92362	3	In	Between -1SD and -2SD	65	0.0211277	0.859213
Best Weightage found :
To Score MAE(Loo)	0.5
To Score (AD)	0.5
To Score (Mean)	0
Correct Score Prediction(%) : 100
Internal validation metrics:
R^2	0.72896
Q^2(LOO)	0.65664
Avg Rm^2	0.53667
Delta Rm^2	0.23598
MAE (100% data)	0.86999
MAE (95% data)	0.79331
External validation metrics:
Q2F1 (or R2pred)	0.73514
Q2F2	0.71186
Q2F3	0.8494
Avg Rm^2 (Test)	0.65339
Delta Rm^2 (Test)	0.11856
CCC (test)	0.83048
MAE (100% Test data)	0.50033
MAE (95% Test data)	0
Table S14. Detailed results of the prediction quality for each unknown external compound in the rat-mouse iQCCR model defined by Equation (7).
TestCompNo	Score(MAE-LOO)	Score(Proximity Train YObs Mean)	Score(Similarity based AD)	CompositeScore	Prediction Quality	YPred(Test)	AD status	Closest Training Compound	Euclidean Distance	Generalized Jaccard Coeff.
1	3	3	3	3	Good	3.69092	In	68	0.0146381	0.979325
7	2	3	3	3	Good	5.05699	In	55	0.0378493	0.963531
8	2	3	3	3	Good	4.40388	In	2	0.03665	0.96335
12	3	3	3	3	Good	3.7586	In	61	0.00535979	0.992897
14	2	3	3	3	Good	2.78276	In	57	0.01879	0.955005
18	3	3	3	3	Good	3.67052	In	68	0.0100898	0.985657
19	2	3	3	3	Good	3.12104	In	42	0.00202643	0.996143
21	2	3	3	3	Good	4.42384	In	2	0.0317073	0.968293
22	2	3	3	3	Good	4.65544	In	9	0.0243597	0.97622
27	2	3	3	3	Good	3.25387	In	49	0.00800747	0.986108
31	2	3	3	3	Good	5.0258	In	55	0.0307229	0.970193
35	2	3	3	3	Good	1.71138	In	53	0.0290954	0.868618
36	2	3	3	3	Good	4.0275	In	26	0.00817648	0.990416
43	3	3	3	3	Good	3.37196	In	49	0.0165022	0.972167
44	2	3	3	3	Good	-0.178282	In	69	0.0913045	#NAME?
51	2	3	3	3	Good	1.78292	In	53	0.017591	0.920567
56	2	3	3	3	Good	5.49	In	55	0.136797	0.879665
62	3	3	3	3	Good	3.43901	In	49	0.0304171	0.949875
User-defined Weightage :
To Score MAE(Loo)	0.5
To Score (AD)	0.5
To Score (Mean)	0
Internal validation metrics:
R^2	0.72896
Q^2(LOO)	0.65664
Avg Rm^2	0.53667
Delta Rm^2	0.23598
MAE (100% data)	0.86999
MAE (95% data)	0.79331

## Sheet: Table S15-S16
Table S15. Detailed results of the prediction quality for each compound in the test set of the mouse-rat iQCCR model defined by Equation (8).
TestCompNo	Score(MAE-LOO)	Score(Proximity Train YObs Mean)	Score(Similarity based AD)	CompositeScore	Prediction Quality	Yobs(Test)	YPred(Test)	AbsPredictionError	Score(AbsPredictionError)	AD status	YObs(Test) Distribution	Closest Training Compound	Euclidean Distance	Generalized Jaccard Coeff.
4	2	3	3	3	Good	3.13467	3.33781	0.203143	3	In	Between +1SD and -1SD	66	0.0039688	0.992926
11	2	3	3	3	Good	2.50475	2.152	0.352756	3	In	Between +1SD and -1SD	65	0.00919703	0.962978
16	2	3	3	3	Good	2.98958	3.52266	0.53308	3	In	Between +1SD and -1SD	3	0.00221948	0.996478
30	2	3	3	3	Good	2.0692	1.65755	0.411656	3	In	Between +1SD and -1SD	63	0.0104654	0.93717
39	2	3	3	3	Good	3.70444	4.29092	0.586478	3	In	Between +1SD and -1SD	55	0.061579	0.938421
48	2	3	3	3	Good	4.16079	3.65322	0.507568	3	In	Between +1SD and -1SD	52	0.0219412	0.966744
53	2	3	3	3	Good	1.71021	2.4144	0.704183	3	In	Between +1SD and -1SD	29	0.00276913	0.991132
54	2	3	3	3	Good	1.30137	0.850689	0.450683	3	In	Between +1SD and -1SD	10	0.0250475	0
Best Weightage found :
To Score MAE(Loo)	0.5
To Score (AD)	0.5
To Score (Mean)	0
Correct Score Prediction(%) : 100
Internal validation metrics:
R^2	0.72978
Q^2(LOO)	0.69144
Avg Rm^2	0.57266
Delta Rm^2	0.22195
MAE (100% data)	0.7638
MAE (95% data)	0.68638
External validation metrics:
Q2F1 (or R2pred)	0.72512
Q2F2	0.71714
Q2F3	0.91034
Avg Rm^2 (Test)	0.71171
Delta Rm^2 (Test)	0.14647
CCC (test)	0.88149
MAE (100% Test data)	0.46869
MAE (95% Test data)	0
Table S16. Detailed results of the prediction quality for each unknown external compound in the mouse-rat iQCCR model defined by Equation (8).
TestCompNo	Score(MAE-LOO)	Score(Proximity Train YObs Mean)	Score(Similarity based AD)	CompositeScore	Prediction Quality	YPred(Test)	AD status	Closest Training Compound	Euclidean Distance	Generalized Jaccard Coeff.
6	2	3	3	3	Good	4.35156	In	55	0.045885	0.954115
24	2	3	3	3	Good	1.64002	In	28	0.011649	0.922123
33	2	3	3	3	Good	4.85454	In	2	0.0241268	0.976442
34	2	3	3	3	Good	2.8864	In	9	0.00214578	0.99497
37	2	3	3	3	Good	3.9854	In	32	0.00868428	0.989487
40	2	3	3	3	Good	3.75495	In	61	0.0113287	0.984552
41	2	3	3	3	Good	2.77197	In	26	0.00309802	0.992167
45	2	3	3	3	Good	-0.0285571	In	10	0.0934762	#NAME?
47	2	3	3	3	Good	4.74384	In	2	0.00293356	0.997066
50	2	3	3	3	Good	0.706815	In	10	0.00565305	0
58	2	3	3	3	Good	5.91535	In	2	0.283431	0.779161
60	2	3	3	3	Good	2.45423	In	42	0.000817874	0.997436
64	2	3	3	3	Good	1.13889	In	25	0.0445351	0.615529
67	2	3	3	3	Good	3.15445	In	5	0.00292898	0.994252
User-defined Weightage :
To Score MAE(Loo)	0.5
To Score (AD)	0.5
To Score (Mean)	0
Internal validation metrics:
R^2	0.72978
Q^2(LOO)	0.69144
Avg Rm^2	0.57266
Delta Rm^2	0.22195
MAE (100% data)	0.7638
MAE (95% data)	0.68638
