# Supplementary material for: Systematic QSAR and iQCCR modelling of fused/non-fused aromatic hydrocarbons (FNFAHs) carcinogenicity to rodents: reducing unnecessary chemical synthesis and animal testing
Source: Royal Society of Chemistry journal article supplement (doi:10.1039/d2gc00986b), 2022-01-01
Supplement: d2gc00986b4.xlsx [file d2gc00986b4.xlsx]

## Sheet: Tabe of Contents
All Supplementary Tables are presented in Corresponding Excel Sheets
Electronic Supplementary Information-4
Systematic QSAR and iQCCR Modelling of Fused/Non-Fused Aromatic Hydrocarbons (FNFAHs) Carcinogenicity to Rodents: Reduce Unnecessary Chemical Synthesis and Animal Testing
Feifan Lia, Tengjiao Fana,b, Guohui Suna,*, Lijiao Zhaoa, Rugang Zhonga, Yongzhen Pengc
aBeijing Key Laboratory of Environmental and Viral Oncology, Faculty of Environment and Life, Beijing University of Technology, Beijing 100124, P. R. China bDepartment of Medical Technology, Beijing Pharmaceutical University of Staff and Workers, Beijing 100079, China cNational Engineering Laboratory for Advanced Municipal Wastewater Treatment and Reuse Technology, Faculty of Environment and Life…
*Corresponding author: Guohui Sun; E-mail address: sunguohui@bjut.edu.cn (G.S); Tel.: +86-10-67391917
Content of Sheets
Table S1. Detailed information of the top 25 most carcinogenic FNFAHs in the unknown external set predicted by the female rat QSAR model.
Table S2. Detailed information of the top 25 most carcinogenic FNFAHs in the unknown external set predicted by the male rat QSAR model.
Table S3. Detailed information of the top 25 most carcinogenic FNFAHs in the unknown external set predicted by the female mouse QSAR model.
Table S4. Detailed information of the top 25 most carcinogenic FNFAHs in the unknown external set predicted by the female mouse QSAR model.
Table S5. Detailed information of the top 25 most carcinogenic FNFAHs in the unknown external set predicted by the rat QSAR model.
Table S6. Detailed information of the top 25 most carcinogenic FNFAHs in the unknown external set predicted by the mouse QSAR model.
Table S7. Detailed information of the top 10 most carcinogenic FNFAHs in the unknown external set predicted by the rat-mouse iQCCR model.
Table S8. Detailed information of the top 10 most carcinogenic FNFAHs in the unknown external set predicted by the mouse-rat iQCCR model.

## Sheet: Table S1
Table S1. Detailed information of the top 25 most carcinogenic FNFAHs in the unknown external set predicted by the female rat QSAR model.
Comp. No	CAS	Name	Structure	Prediction Quality	Pred. pTD50	Ranking of Carcinogenic Potency
142	21626-89-1	Diftalone		Moderate	13.2585	1
211	23214-92-8	Doxorubicin		Moderate	12.7045	2
212	5522-43-0	1-Nitropyrene		Moderate	12.0582	3
150	476-66-4	Ellagic acid		Moderate	10.849	4
145	57-97-6	7,12-Dimethylbenz(a)anthracene		Moderate	9.70516	5
155	363-17-7	N-(2-Fluorenyl)-2,2,2-trifluoroacetamide		Good	8.18271	6
25	33857-26-0	2,7-dichlorodibenzo[b,e][1,4]dioxine		Good	6.93935	7
151	29975-16-4	Estazolam		Good	6.89881	8
1	26148-68-5	1,9-dihydro-2H-pyrido[2,3-b]indol-2-imine		Good	6.48196	9
41	91-20-3	naphthalene		Good	6.41856	10
123	2227-13-6	Tetrasul		Moderate	6.16899	11
68	602-87-9	5-nitro-1,2-dihydroacenaphthylene		Moderate	6.08547	12
160	103-16-2	Monobenzone		Good	5.81422	13
159	70-30-4	Hexachlorophene		Good	5.65387	14
121	86-74-8	Carbazole		Good	5.50879	15
171	5834-17-3	2-Methoxy-3-dibenzofuranamine		Good	5.19939	16
210	304-28-9	2,7-Diacetylaminofluorene		Good	5.16362	17
196	1508-45-8	Mitopodozide		Good	4.86323	18
177	838-88-0	4,4'-Methylene bis(2-methylaniline)		Good	4.69341	19
109	28314-03-6	1-Acetylaminofluorene		Good	4.59508	20
11	120-32-1	2-benzyl-4-chlorophenol		Good	4.58899	21
168	67-98-1	Ethamoxytriphetol		Good	4.49322	22
189	92-84-2	Phenothiazine		Good	4.48836	23
31	324-93-6	4'-fluoro-[1,1'-biphenyl]-4-amine		Good	4.48108	24
204	116-29-0	Tetradifon		Good	4.48088	25

## Sheet: Table S2
Table S2. Detailed information of the top 25 most carcinogenic FNFAHs in the unknown external set predicted by the male rat QSAR model.
Comp. No	CAS	Name	Structure	Prediction Quality	Pred. pTD50	Ranking of Carcinogenic Potency
143	65176-75-2	5,6-Dimethoxysterigmatocystin		Good	7.40797	1
159	70-30-4	Hexachlorophene		Good	6.66736	2
186	27753-52-2	Nonabromobiphenyl		Good	5.95905	3
205	97-18-7	Bithionol		Good	5.84061	4
123	2227-13-6	Tetrasul		Good	5.76804	5
56	83-79-4	Rotenone		Good	5.72105	6
117	120-78-5	Dibenzothiazyl disulfide		Good	5.42817	7
210	304-28-9	2,7-Diacetylaminofluorene		Good	5.3365	8
1	26148-68-5	2-Amino-9H-Pyrido[2,3-B]Indole		Good	5.24717	9
203	15721-02-5	2,2',5,5'-Tetrachlorobenzidine		Good	5.09281	10
158	517-28-2	Hematoxylin		Good	5.03068	11
54	117-39-5	Quercetin		Moderate	4.94055	12
180	5800-19-1	Metiapine		Good	4.85897	13
177	838-88-0	4,4'-Methylene bis(2-methylaniline)		Good	4.83033	14
131	131-01-1	Deserpidine		Good	4.79303	15
155	363-17-7	Acetamide, N-fluoren-2-yl-2,2,2-trifluoro-		Moderate	4.71886	16
157	93957-54-1	Fluvastatin		Good	4.66638	17
176	56-49-5	3-Methylcholanthrene		Good	4.5621	18
167	50264-69-2	Lonidamine		Good	4.55073	19
38	101-61-1	4,4'-methylenebis(N,N-dimethylaniline)		Good	4.37099	20
14	2475-45-8	1,4,5,8-tetraaminoanthracene-9,10-dione		Good	4.31711	21
113	68844-77-9	Astemizole		Moderate	4.27593	22
139	91-94-1	3,3'-Dichlorobenzidine		Good	4.2698	23
109	28314-03-6	1-Acetylaminofluorene		Good	4.26046	24
165	520-18-3	Kaempferol		Good	4.23146	25

## Sheet: Table S3
Table S3. Detailed information of the top 25 most carcinogenic FNFAHs in the unknown external set predicted by the female mouse QSAR model.
Comp. No	CAS	Name	Structure	Prediction Quality	Pred. pTD50	Ranking of Carcinogenic Potency
208	5979-28-2	Pigment yellow 16		Moderate	9.15355	1
209	5567-15-7	C.I. Pigment Yellow 83		Moderate	9.09648	2
64	6358-85-6	C.I. Pigment Yellow 12		Moderate	7.44227	3
159	70-30-4	Hexachlorophene		Moderate	7.00598	4
123	2227-13-6	Tetrasul		Moderate	6.88145	5
203	15721-02-5	2,2',5,5'-Tetrachlorobenzidine		Moderate	6.65281	6
25	33857-26-0	2,7-dichlorodibenzo[b,e][1,4]dioxine		Good	6.38771	7
152	22966-79-6	Estradiol mustard		Moderate	6.08307	8
174	11013-97-1	Methyl hesperidin		Moderate	5.85533	9
198	13292-46-1	Rifampin		Moderate	5.71163	10
205	97-18-7	Bithionol		Moderate	5.53278	11
151	29975-16-4	Estazolam		Good	5.25374	12
37	101-14-4	4,4'-methylenebis(2-chloroaniline)		Good	5.16299	13
201	569-57-3	Chlorotrianisene		Good	5.15958	14
139	91-94-1	3,3'-Dichlorobenzidine		Good	5.10923	15
138	117-80-6	2,3-Dichlor-1,4-naphthochinon		Good	4.96461	16
180	5800-19-1	Metiapine		Good	4.85201	17
41	91-20-3	naphthalene		Good	4.76095	18
146	74-31-7	p-Phenylenediamine, N,N'-diphenyl-		Good	4.76013	19
125	22494-47-9	Clobuzarit		Good	4.55916	20
204	116-29-0	Tetradifon		Moderate	4.53558	21
155	363-17-7	Acetamide, N-fluoren-2-yl-2,2,2-trifluoro-		Good	4.51867	22
120	63-25-2	Carbaryl		Good	4.43784	23
184	86-88-4	1-(1-Naphthyl)-2-thiourea		Good	4.41182	24
211	23214-92-8	Doxorubicin		Good	4.37525	25

## Sheet: Table S4
Table S4. Detailed information of the top 25 most carcinogenic FNFAHs in the unknown external set predicted by the female mouse QSAR model.
Comp. No	CAS	Name	Structure	Prediction Quality	Pred. pTD50	Ranking of Carcinogenic Potency
159	70-30-4	Hexachlorophene		Moderate	6.17073	1
139	91-94-1	3,3'-Dichlorobenzidine		Good	6.08174	2
138	117-80-6	2,3-Dichlor-1,4-naphthochinon		Moderate	5.90783	3
115	92-87-5	Benzidine		Good	5.62585	4
123	2227-13-6	Tetrasul		Good	5.61137	5
205	97-18-7	Bithionol		Good	5.47802	6
192	92-69-3	4-Hydroxybiphenyl		Good	5.26999	7
158	517-28-2	Hematoxylin		Moderate	5.18444	8
203	15721-02-5	2,2',5,5'-Tetrachlorobenzidine		Good	5.18099	9
33	53-95-2	N-(9H-fluoren-2-yl)-N-hydroxyacetamide		Good	5.10933	10
131	131-01-1	Deserpidine		Moderate	5.10836	11
176	56-49-5	3-Methylcholanthrene		Good	5.02476	12
37	101-14-4	4,4'-methylenebis(2-chloroaniline)		Good	5.02375	13
119	145040-37-5	Candesartan cilexetil		Moderate	5.02027	14
204	116-29-0	Tetradifon		Moderate	5.01992	15
212	5522-43-0	1-Nitropyrene		Good	4.99786	16
110	28322-02-3	4-Acetylaminofluorene		Good	4.86349	17
171	5834-17-3	2-Methoxy-3-dibenzofuranamine		Good	4.83341	18
50	‘77-09-08	3,3-bis(4-hydroxyphenyl)isobenzofuran-1(3H)-one		Good	4.77316	19
182	86-87-3	alpha-Naphthylacetic acid		Moderate	4.76855	20
155	363-17-7	Acetamide, N-fluoren-2-yl-2,2,2-trifluoro-		Good	4.73104	21
151	29975-16-4	Estazolam		Good	4.72245	22
128	80-08-0	Dapsone		Good	4.66549	23
135	439-14-5	Diazepam		Good	4.56126	24
133	538-41-0	4,4'-Diaminoazobenzene		Good	4.53633	25

## Sheet: Table S5
Table S5. Detailed information of the top 25 most carcinogenic FNFAHs in the unknown external set predicted by the rat QSAR model.
Comp. No	CAS	Name	Structure	Prediction Quality	Pred. pTD50	Ranking of Carcinogenic Potency
56	83-79-4	Rotenone		Good	6.40286	1
155	363-17-7	Acetamide, N-fluoren-2-yl-2,2,2-trifluoro-		Good	6.06072	2
1	26148-68-5	1,9-dihydro-2H-pyrido[2,3-b]indol-2-imine		Good	5.76066	3
123	2227-13-6	Tetrasul		Good	5.61055	4
207	865-21-4	Vinblastine		Good	5.59374	5
143	65176-75-2	5,6-Dimethoxysterigmatocystin		Good	5.27456	6
180	5800-19-1	Metiapine		Good	5.26469	7
131	131-01-1	Deserpidine		Good	5.15109	8
167	50264-69-2	Lonidamine		Good	5.05773	9
211	23214-92-8	Doxorubicin		Good	5.03555	10
117	120-78-5	Dibenzothiazyl disulfide		Good	5.02679	11
150	476-66-4	Ellagic acid		Good	4.99575	12
142	21626-89-1	Diftalone		Moderate	4.96262	13
152	22966-79-6	Estradiol mustard		Good	4.89739	14
109	28314-03-6	1-Acetylaminofluorene		Good	4.77311	15
125	22494-47-9	Clobuzarit		Good	4.70219	16
174	11013-97-1	Methyl hesperidin		Good	4.70084	17
203	15721-02-5	2,2',5,5'-Tetrachlorobenzidine		Good	4.66849	18
198	13292-46-1	Rifampin		Good	4.55033	19
113	68844-77-9	Astemizole		Good	4.53468	20
193	2955-38-6	Prazepam		Good	4.48769	21
176	56-49-5	3-Methylcholanthrene		Good	4.42218	22
151	29975-16-4	Estazolam		Good	4.34212	23
210	304-28-9	2,7-Diacetylaminofluorene		Good	4.26973	24
133	538-41-0	4,4'-Diaminoazobenzene		Good	4.21653	25

## Sheet: Table S6
Table S6. Detailed information of the top 25 most carcinogenic FNFAHs in the unknown external set predicted by the mouse QSAR model.
Comp. No	CAS	Name	Structure	Prediction Quality	Pred. pTD50	Ranking of Carcinogenic Potency
203	15721-02-5	2,2',5,5'-Tetrachlorobenzidine		Moderate	6.74351	1
159	70-30-4	Hexachlorophene		Good	6.18532	2
37	101-14-4	4,4'-methylenebis(2-chloroaniline)		Good	5.08893	3
115	92-87-5	Benzidine		Good	4.76053	4
179	90-12-0	1-Methylnaphthalene		Good	4.73401	5
186	27753-52-2	Nonabromobiphenyl		Good	4.71931	6
41	91-20-3	naphthalene		Good	4.64713	7
139	91-94-1	3,3'-Dichlorobenzidine		Good	4.50498	8
204	116-29-0	Tetradifon		Good	4.48758	9
137	4106-66-5	3-Aminodibenzofuran		Good	4.38531	10
126	477-30-5	Demecolcine		Good	4.38479	11
121	86-74-8	Carbazole		Good	4.2969	12
123	2227-13-6	Tetrasul		Good	4.29459	13
64	6358-85-6	C.I. Pigment Yellow 12		Good	4.26366	14
24	262-12-4	dibenzo[b,e][1,4]dioxine		Good	4.24468	15
177	838-88-0	4,4'-Methylene bis(2-methylaniline)		Good	4.13632	16
171	5834-17-3	2-Methoxy-3-dibenzofuranamine		Good	4.09006	17
172	72-43-5	Methoxychlor		Good	4.0676	18
143	65176-75-2	5,6-Dimethoxysterigmatocystin		Good	3.96701	19
129	53-19-0	Mitotane		Good	3.7751	20
119	145040-37-5	Candesartan cilexetil		Good	3.77218	21
47	303-47-9	Ochratoxin A		Good	3.75544	22
211	23214-92-8	Doxorubicin		Good	3.72966	23
111	3693-22-9	2-Dibenzofuranamine		Good	3.72653	24
201	569-57-3	Chlorotrianisene		Good	3.70095	25

## Sheet: Table S7
Table S7. Detailed information of the top 10 most carcinogenic FNFAHs in the unknown external set predicted by the rat-mouse iQCCR model.
Comp. No	CAS	Name	Structure	Prediction Quality	Pred. pTD50	Ranking of Carcinogenic Potency
56	83-79-4	Rotenone		Good	5.49	1
7	92-67-1	[1,1'-biphenyl]-4-amine		Good	5.05699	2
31	324-93-6	4'-fluoro-[1,1'-biphenyl]-4-amine		Good	5.0258	3
22	50-29-3	4,4'-(2,2,2-trichloroethane-1,1-diyl)bis(chlorobenzene)		Good	4.65544	4
21	72-55-9	4,4'-(2,2-dichloroethene-1,1-diyl)bis(chlorobenzene)		Good	4.42384	5
8	3693-22-9	dibenzo[b,d]furan-2-amine		Good	4.40388	6
36	21340-68-1	Methyl clofenapate		Good	4.0275	7
12	79520-77-7	5,5'-([1,1'-biphenyl]-2,5-diylbis(oxy))bis(2,2-dimethylpentanoic acid)		Good	3.7586	8
1	26148-68-5	1,9-dihydro-2H-pyrido[2,3-b]indol-2-imine		Good	3.69092	9
18	10473-70-8	1-(4-chlorophenyl)-1-phenylprop-2-yn-1-yl hydrogen carbonimidate		Good	3.67052	10

## Sheet: Table S8
Table S8. Detailed information of the top 10 most carcinogenic FNFAHs in the unknown external set predicted by the mouse-rat iQCCR model.
Comp. No	CAS	Name	Structure	Prediction Quality	Pred. pTD50	Ranking of Carcinogenic Potency
58	10048-13-2	Sterigmatocystin		Good	5.91535	1
33	53-95-2	N-(9H-fluoren-2-yl)-N-hydroxyacetamide		Good	4.85454	2
47	303-47-9	Ochratoxin A		Good	4.74384	3
6	97-56-3	O-Aminoazotoluene		Good	4.35156	4
37	101-14-4	4,4'-methylenebis(2-chloroaniline)		Good	3.9854	5
40	3771-19-5	Nafenopin		Good	3.75495	6
67	129-15-7	2-methyl-1-nitroanthracene-9,10-dione		Good	3.15445	7
34	129-43-1	1-hydroxyanthracene-9,10-dione		Good	2.8864	8
41	91-20-3	naphthalene		Good	2.77197	9
60	96-69-5	4,4'-thiobis(2-(tert-butyl)-5-methylphenol)		Good	2.45423	10
